# Supplementary material for: Triple-arm trial of pH (Tri-pH) effect on live birth after ICSI in Egyptian IVF facilities: protocol of a randomised controlled trial
Source: PubMed Central journal article supplement — BMJ Open. 2020 Feb 4;10(2):e034194. doi: 10.1136/bmjopen-2019-034194 (PMC7044928; doi:10.1136/bmjopen-2019-034194), 2020-02-04
Supplement: bmjopen-2019-034194.draft_revisions.pdf [file bmjopen-2019-034194.draft_revisions.pdf]

# BMJ Open

BMJ Open is committed to open peer review. As part of this commitment we make the peer review history of every article we publish publicly available.

When an article is published we post the peer reviewers' comments and the authors' responses online. We also post the versions of the paper that were used during peer review. These are the versions that the peer review comments apply to.

The versions of the paper that follow are the versions that were submitted during the peer review process. They are not the versions of record or the final published versions. They should not be cited or distributed as the published version of this manuscript.

BMJ Open is an open access journal and the full, final, typeset and author-corrected version of record of the manuscript is available on our site with no access controls, subscription charges or pay-per-view fees (<http://bmjopen.bmj.com>).

If you have any questions on BMJ Open's open peer review process please email [info.bmjopen@bmj.com](mailto:info.bmjopen@bmj.com)

# BMJ Open

## Triple-arm Trial of pH (Tri-pH) Effect on Term Live birth After ICSI

|                               |                                                                                                                                                                                                                                                                                                                                  |
|-------------------------------|----------------------------------------------------------------------------------------------------------------------------------------------------------------------------------------------------------------------------------------------------------------------------------------------------------------------------------|
| Journal:                      | <i>BMJ Open</i>                                                                                                                                                                                                                                                                                                                  |
| Manuscript ID                 | bmjopen-2019-034194                                                                                                                                                                                                                                                                                                              |
| Article Type:                 | Protocol                                                                                                                                                                                                                                                                                                                         |
| Date Submitted by the Author: | 09-Sep-2019                                                                                                                                                                                                                                                                                                                      |
| Complete List of Authors:     | Fawzy, Mohamed; IbnSina Hospital, Ibsina IVF Centre<br>Emad, Mai<br>Wilkinson, Jack; University of Manchester, Centre for Biostatistics;<br>Salford Royal NHS Foundation Trust, Research and Development<br>Mansour, Ragaa; Egyptian IVF-ET Center<br>Mahran, Ali<br>Fetih, Ahmed<br>Abdelrahman , Mohamed<br>AbdelGhafar, Hazem |
| Keywords:                     | Embryo culture, pH level, culture media, blastocyst formation                                                                                                                                                                                                                                                                    |
|                               |                                                                                                                                                                                                                                                                                                                                  |

SCHOLARONE™  
Manuscripts

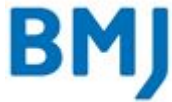

I, the Submitting Author has the right to grant and does grant on behalf of all authors of the Work (as defined in the below author licence), an exclusive licence and/or a non-exclusive licence for contributions from authors who are: i) UK Crown employees; ii) where BMJ has agreed a CC-BY licence shall apply, and/or iii) in accordance with the terms applicable for US Federal Government officers or employees acting as part of their official duties; on a worldwide, perpetual, irrevocable, royalty-free basis to BMJ Publishing Group Ltd ("BMJ") its licensees and where the relevant Journal is co-owned by BMJ to the co-owners of the Journal, to publish the Work in this journal and any other BMJ products and to exploit all rights, as set out in our [licence](#).

The Submitting Author accepts and understands that any supply made under these terms is made by BMJ to the Submitting Author unless you are acting as an employee on behalf of your employer or a postgraduate student of an affiliated institution which is paying any applicable article publishing charge ("APC") for Open Access articles. Where the Submitting Author wishes to make the Work available on an Open Access basis (and intends to pay the relevant APC), the terms of reuse of such Open Access shall be governed by a Creative Commons licence – details of these licences and which [Creative Commons](#) licence will apply to this Work are set out in our licence referred to above.

Other than as permitted in any relevant BMJ Author's Self Archiving Policies, I confirm this Work has not been accepted for publication elsewhere, is not being considered for publication elsewhere and does not duplicate material already published. I confirm all authors consent to publication of this Work and authorise the granting of this licence.

## pH-Study Protocol

### Title: Triple-arm Trial of pH (Tri-pH) Effect on Term Live birth After ICSI

Mohamed Fawzy,<sup>a</sup> Mai Emad,<sup>a</sup> Jack Wilkinson,<sup>b</sup> Ragaa Mansour,<sup>c</sup> Ali Mahran,<sup>d</sup> Ahmed N. Fetih,<sup>e</sup> Mohamed Y. AbdelRahman,<sup>f</sup> Hazem Abdelghafar,<sup>f</sup>

*IbnSina IVF Centre, Sohag and Banon IVF Centre, Assuit, Egypt*

<sup>a</sup>IbnSina IVF Centre, IbnSina Hospital, Sohag, Egypt; <sup>b</sup>Centre for Biostatistics, University of Manchester, UK; <sup>c</sup>Egyptian IVF-ET Centre, Cairo, Egypt; <sup>d</sup>Department of Dermatology, Venereology and Andrology, Faculty of Medicine, Assiut University, Egypt; <sup>e</sup>Department of Obstetrics and Gynecology, Faculty of Medicine, Assiut University, Egypt; <sup>f</sup>Department of Obstetrics and Gynecology, Sohag University, Egypt

Corresponding Author: Dr. Mohamed Fawzy, IVF Laboratory Director (IbnSina and Banon IVF Centres), IbnSina Hospital, 146 El Aref Square, Sohag, Egypt; Cell: +201011122286; E-mail: [drfawzy001@me.com](mailto:drfawzy001@me.com)

## Abstract

### Introduction

The pH of culture media for human in vitro fertilization (IVF) is a potential stressor that can affect pre- and post-implantation embryonic growth. There has been no clear evidence about the level that can support in vitro human embryo development optimally. Most manufactures of culture media have specified a range of 7.2 to 7.4, and routine practice is to use a level of 7.25 to 7.3 pH. However, these recommendations resulted from designers' wishes or experiments on mice models. There has been no randomised trial to search for the effect of pH level on live birth rate after IVF. The aim of this trial is to examine if there is an effect on live birth rate using three different levels of pH.

### Methods and analysis

This multicentre randomised trial will involve centres specialised in IVF in Egypt. Eligible women amenable for intracytoplasmic sperm injection (ICSI) will be randomized to undergo in vitro culture in either 7.2, 7.3 or 7.4 pH level. The study is designed to detect 10% difference in live birth rate with 93% per cent power at 1% significance level.

### Ethics of conduct

Ethics review boards of the participating centres approved the study and eligible women will sign written informed consent before enrolment. The study has established an independent data monitoring and safety committee from international experts in the field and in trial design.

**Trial registration number** NCT02896777.

### Keywords

Embryo culture, pH level, culture media, blastocyst formation

## 57 **Background**

58  
59 Assisted reproductive techniques (ART) result in around 65% cumulative live birth within six  
60 cycles of *in vitro* fertilisation (IVF),<sup>1</sup> which is relatively suboptimal. In addition, IVF results  
61 in adverse perinatal outcomes, such as preterm birth and low birth weight babies compared  
62 with the *in vivo* conception.<sup>2</sup> These outcomes can rely on factors relating to patients,  
63 stimulation, and *in vitro* culture elements. In relation to embryo culture conditions, over 200  
64 variables have been identified as being potentially relevant to the cycle outcome.<sup>3</sup> One  
65 element that may influence embryo development *in vitro* is the pH level of a culture medium,  
66 which thus far has been determined by manufacturers of culture media without recourse to a  
67 well-powered randomized clinical trial (RCT).<sup>4</sup> The pH levels are potential stressors that vary  
68 between media brands and from batch-to-batch depending on the bicarbonate level in culture  
69 media and on the CO<sub>2</sub> level of incubators.<sup>5</sup> This would suggest that pH level can vary  
70 between incubators within the same laboratory if it is not well adjusted. Recommendations  
71 for measuring pH for embryo culture are variable between daily to monthly measurement.<sup>4</sup>  
72 Oocytes and embryos have intercellular (pHi), which is modulated by the extracellular pH  
73 (pHe).<sup>6</sup> The *in vitro* conditions including concentrations of bicarbonates, proteins, amino  
74 acids in culture media and the CO<sub>2</sub> of incubators affect the pHe, which is a potential stressor.<sup>7</sup>  
75 The mechanism of pHi in oocyte and embryo is complex, regulating enzymatic activity, cell  
76 division and differentiation, protein synthesis, metabolism, mitochondrial function,  
77 cytoskeletal regulation, and microtubule dynamics.<sup>7,8</sup> Drifts in pHe translate into changes in  
78 pHi, which can adversely affect cell function if the compensatory mechanisms failed to adapt  
79 to restore pHi to a safe level.<sup>8</sup> The pHi can compensate through an active exchange among  
80 Na<sup>+</sup>, HCO<sub>3</sub><sup>-</sup>/Cl<sup>-</sup> and Na<sup>+</sup>/H<sup>+</sup> to maintain it between 7 to 7.3.<sup>5,8</sup> Denuded oocyte for ICSI  
81 through fertilization thereafter and vitrified-warmed embryos lack robust compensatory

1  
2  
3 82 mechanisms of pHi; therefore, drastic differences between pHe and pHi in these scenarios  
4  
5 83 can significantly perturbate embryo development.<sup>9-11</sup>  
6  
7  
8 84 That being said, an optimum level of pH for human embryo culture in vitro is still unknown.<sup>4</sup>  
9  
10 85 <sup>9 12-15</sup> Most recommendations rely on mice models or manufacturers of culture media.  
11  
12 86 Theoretically, a wide range of pHe levels (7.0–7.5) are believed to support human embryo  
13  
14 87 development *in vitro*. This multicentre, randomized, clinical trial aims to compare the  
15  
16 88 influence of three commonly used levels of pH on term live birth rate after ICSI, in order to  
17  
18 89 investigate the potential for optimisation.  
19  
20

## 21 90 **Methods and Design**

22  
23  
24 91 This protocol version one of a multicentre, randomized, triple-arm, triple-blind clinical trial  
25  
26 92 (NCT02896777, registered at [www.ClinicalTrials.gov](http://www.ClinicalTrials.gov)) will compare three levels of pH for  
27  
28 93 human embryo culture in vitro on term livebirth after ICSI. This partially blind design  
29  
30 94 represents that clinicians, participants and outcome assessor, not including the embryologists,  
31  
32 95 will be unaware of the study arms. This multicentre trial will involve private IVF facilities in  
33  
34 96 Egypt (Ibnsina IVF Centre, Egyptian IVF-ET centre, Banon IVF Centre, Qena IVF Centre  
35  
36 97 and Amshaj IVF Centre and others) with the study protocol in their hand before enrolment of  
37  
38 98 participants. This trial obtained the approval from Ethics Review Board of Upper Egypt IVF  
39  
40 99 Network relating to the participating sites (Approval No. 009/2016). An independent safety  
41  
42 100 and monitoring committee formed of five experts in reproductive endocrinology,  
43  
44 101 reproductive biology, embryo culture, biostatistics and trial methodology will oversee this  
45  
46 102 trial. All participants will receive independent counselling from research instructors who are  
47  
48 103 not involved in patient care or laboratory work. Participants who will accept to participate  
49  
50 104 will sign a written informed consent before enrolment. Conducting this study will be in  
51  
52 105 accordance with the Declaration of Helsinki.<sup>16</sup> The trial reporting will be according to the  
53  
54 106 CONSORT statement,<sup>17</sup> unless other guideline will have higher ranking at that time. No plan  
55  
56  
57  
58  
59  
60

1  
2  
3 107 exists to amend this protocol and any amendments will be responsibility for the safety  
4  
5 108 committee and will undergo detailed reporting on the trial registry and in the final  
6  
7  
8 109 manuscript.  
9  
10 110 Oocytes and embryos in the three arms will undergo continuous culture from day 0 through  
11  
12 111 day 5 or 6 without medium renewal. “Arm I” is to culture oocytes and resulting embryos after  
13  
14 112 ICSI in pHe of  $7.2\pm 0.02$ . Arm II The “Arm II” is to culture oocytes and resulting embryos  
15  
16 113 after ICSI in pHe of  $7.3\pm 0.02$ . “Arm III” is to culture oocytes and resulting embryos after  
17  
18 114 ICSI in pHe of  $7.4\pm 0.02$ . This trial will include intracytoplasmic sperm injection (ICSI)  
19  
20 115 cycles.  
21  
22

### 23 116 **Randomization and Masking**

24  
25  
26 117 Using an online tool, participants will be randomised to the experimental arms with a 1:1:1  
27  
28 118 allocation ratio. The allocation sequence of participants will be generated using a permuted  
29  
30 119 block randomization of 3, 6 and 9 block sizes with unique identifiers in random order,  
31  
32  
33 120 stratified by trial site. Randomization of participants and its storage in sequentially numbered,  
34  
35 121 opaque, sealed envelopes will occur by a secretary with no involvement in patient care and  
36  
37 122 will be provided to trial sites before enrolment of first participant. Eligible participants will  
38  
39 123 be allocated to the relevant arms on the day of maturation trigger and allocation result will be  
40  
41 124 communicated to the laboratory team. Participants, clinicians and outcome assessors for the  
42  
43 125 clinical outcomes will be unaware of the allocation, while embryologists who will assess  
44  
45 126 embryo development will be aware of the allocation.  
46  
47  
48

### 49 127 **Participants**

50  
51 128 The inclusion criteria include:

- 52  
53 129 1) Women age of  $\geq 18$  to  $\leq 40$ ;  
54  
55 130 2) BMI of  $\leq 31$ ;  
56  
57 131 3) Anticipated normal responder by 10 basal ultrasound examination or AMH measurement);  
58  
59  
60



- 1  
2  
3 132 4) Women who have  $\geq 1$  year of primary or secondary infertility;  
4  
5 133 5) Fresh ejaculate sperm of any count provided they have  $\geq 1\%$  normal forms and a motile  
6  
7 fraction;  
8 134  
9  
10 135 6) Women undergoing their first ICSI cycle or following a previous successful attempt;  
11  
12 136 7) Women with  $> 7$  mm endometrial thickness at day of trigger;  
13  
14 and 8) Women with no detected uterine abnormality on transvaginal ultrasound (e.g.  
15 137  
16 submucosal myomas, polyps or septa).  
17 138

18  
19 139 ***Women will be excluded if they have:***

- 20  
21 140 1) Unilateral oophorectomy;  
22  
23 141 2) Abnormal karyotyping for them or their male partners;  
24  
25 142 3) History of repeated abortions or implantation failure;  
26  
27 143 4) Uncontrolled diabetes;  
28  
29 144 5) Liver or renal disease;  
30  
31 145 6) History of severe ovarian hyperstimulation;  
32  
33 146 7) History of malignancy or borderline pathology;  
34  
35 147 8) Endometriosis;  
36  
37 148 9) Plan for PGD-A;  
38  
39 149 10) Severe male factor includes surgical sperm retrieval or cryopreserved sperm;  
40  
41 and 11) A plan for a “freeze-all”.  
42  
43  
44  
45  
46

47 151 **Stimulation Protocol, Oocyte retrieval, and Luteal Phase Support**

48  
49 152 Women will undergo controlled ovarian stimulation with agonist mid-luteal pituitary down-  
50  
51 153 regulation (Decapeptyl<sup>®</sup> 0.1mg, Ferring, Switzerland) or antagonist (Cetrotide<sup>®</sup> 0.25 mg,  
52  
53 Merck Serono) protocols. Agonist will start on day 19–21 of the preceding cycle and will  
54 154  
55 continue to the day of maturation trigger. For Antagonist group, women will start the  
56 155  
57 antagonist on day 6 of treatment cycle. All women will receive follicular stimulating  
58 156  
59  
60

1  
2  
3 157 hormone (rFSH; Gonal-F, Merck Serono) and human menopausal gonadotropin (HMG;  
4  
5 158 Menogon, Ferring) at 150-300 IU with a 2:1 ratio from cycle day 2 through follicular  
6  
7 159 maturation, with adjustment of the dosage according to the response. When  $\geq 3$  follicles  
8  
9 160 measure  $\geq 18$  mm mean diameter on ultrasound, women will receive a 10,000 IU hCG trigger  
10  
11 161 shot (Choriomon, IBSA) or 250  $\mu$ g rhCG (Ovitrelle, Merck Serono) for final oocyte  
12  
13 162 maturation. Oocyte retrieval will be performed 37 hours after hCG trigger under transvaginal  
14  
15 163 sonographic guidance. Follicular aspirates will be handled in HEPES-buffered medium  
16  
17 164 (global® HEPES, LifeGlobal, Canada) at 37°C using tube warmers. Luteal-phase support  
18  
19 165 will be achieved with intramuscular progesterone (100 mg/mL [Prontogest, IBSA]) once  
20  
21 166 daily or vaginal pessaries (400 mg prontosgest) twice daily, starting on day 1 after retrieval  
22  
23 167 (“day 1”) to 12 weeks of gestation, unless negative pregnancy.  
24  
25  
26  
27

### 28 168 **Sperm Preparation, Oocyte Denudation and ICSI**

29  
30 169 Semen samples will be processed through density gradient,<sup>18</sup> using Puresperm (Nidacon,  
31  
32 170 Sweden). The pellet will undergo once washing and incubation at room temperature in  
33  
34 171 HEPES buffered medium (AllGrade Wash, LifeGlobal). Denudation of oocytes will occur  
35  
36 172 immediately after collection using 40 IU hyaluronidase (LifeGlobal, Canada) diluted in  
37  
38 173 Global HEPES and a stripper of 170 micrometre (Cook, US). Metaphase II (MII) oocytes  
39  
40 174 will undergo ICSI in Global HEPES medium under inverted microscope as previously  
41  
42 175 described.<sup>19</sup>  
43  
44  
45  
46

### 47 176 **Incubator Management and pH Adjustment**

48  
49 177 Incubators for this study involve Labo C-Top (Labotect, Germany), Minc 1000 (Cook, US),  
50  
51 178 and AD-3100 (Astec, Japan). Each centre will use no more than a brand of incubator to  
52  
53 179 account for incubator as variable. If another brand of incubators will be used, we will ensure  
54  
55 180 they are humidified. Dry incubators such as ESCO (Esco Micro Pte. Ltd, Singapore) may be  
56  
57 181 used at some centres; however, we will adjust the analysis by trial site to account for  
58  
59  
60

1  
2  
3 182 differences between centres. Incubators will undergo stringent control of temperature  
4  
5 183 ( $36.9\pm 0.1^{\circ}\text{C}$ ). The temperature will be validated daily using a certified thermometer.  
6  
7  
8 184 Incubator's  $\text{CO}_2$  and  $\text{O}_2$  will be measured daily using a certified gas analyser to ensure 5%  $\text{O}_2$   
9  
10 185 and a proper  $\text{CO}_2$  concentration to achieve the required pH. All the three measurements  
11  
12 186 (temperature,  $\text{CO}_2$  level, and pH levels) will be verified by well-trained person traveling  
13  
14 187 across the sites. Incubators will undergo sterilization with 6%  $\text{H}_2\text{O}_2$  every four weeks, with  
15  
16 188 installation of inline filters (Green, Lifeglobal, CooperSurgical).<sup>20</sup>  
17  
18  
19 189 A minimum of 3 incubators of a single brand within each participating facility with different  
20  
21 190 levels of pH representing the study arms is obligatory: Incubator A of  $7.2\pm 0.02$  pH, Incubator  
22  
23 191 B of  $7.3\pm 0.02$  pH, and Incubator C of  $7.4\pm 0.02$ . The three incubators will undergo a strict  
24  
25 192 adjustment of the required pH using a handheld blood gas analyser (Epoc® Reader and Host;  
26  
27 193 BGEM card US). Constant pH levels will be ensured with twice weekly measurement of pH  
28  
29 194 with blood gas analyser and a daily measurement of  $\text{CO}_2$  level of incubators. Measurement of  
30  
31 195 pH will occur after an overnight incubation of 1mL culture media in a central well dish  
32  
33 196 covered with 0.4mL of oil. In the morning and before opening of incubators, the handheld  
34  
35 197 blood gas analyser (Epoc® Reader and Host; BGEM card US) will undergo preparation for  
36  
37 198 measuring pH as per the manufacturer protocol. Briefly, after switching on the device,  
38  
39 199 calibration of the device automatically occurs. Next, we adjust the temperature to  $37^{\circ}\text{C}$ , and  
40  
41 200 select the sample as arterial. Next, we insert the card, which undergoes automatic calibration.  
42  
43 201 Next, when the device is ready, it asks to inject sample. Next, using 1mL syringe attached to  
44  
45 202 wide needle calibre, we aspirate 0.5mL of the culture medium under oil. Next, we discard the  
46  
47 203 first droplet and smoothly inject the sample until the beep. We can see the results of pH,  
48  
49 204 partial  $\text{CO}_2$  and  $\text{O}_2$  pressures thereafter. Each laboratory will report the results to also  
50  
51 205 compare the resulting partial pressures of  $\text{CO}_2$  and  $\text{O}_2$  with the incubator display. pH will also  
52  
53 206 be measured every new batch of a culture medium. The measurement of pH and  $\text{CO}_2$  across  
54  
55  
56  
57  
58  
59  
60

1  
2  
3 207 the centres will be performed using a one-brand equipment that will undergo periodic  
4  
5 208 calibration together. To account for errors in measurement, one well-trained personnel will be  
6  
7  
8 209 assigned to measure the pH and double check the CO<sub>2</sub> level across the centres.  
9

210

211

## 212 **Culture Protocol and Embryo Scoring**

213 Each culture dish (micro-droplet, Vitrolife) will hold 12 droplets of 20 µl each from Global  
214 Total culture medium (Lifeglobal, CooperSurgical, US) overlaid with 5 ml of oil (NidOil,  
215 Nidacon). If a decision to change culture media at any time point of the study conduct is  
216 made, this will be performed at the same time across the study sites. Dishes will undergo  
217 overnight incubation in the relevant incubator adjusted to the relevant pH as per the  
218 randomization. After ICSI, the injected oocytes will undergo washing in culture medium  
219 followed by incubation from day 0 through day 5 or 6 in the relevant arm of pH, except for  
220 the portion of embryos transferred on day 3. The inseminated oocytes will undergo culture in  
221 groups of 3 each from days 0 to 5/6, with removal of the unfertilized, abnormally fertilized or  
222 degenerated oocytes at fertilization check. Two embryologists will perform the fertilization  
223 check and embryo grading on day 1, 2 and 3 of culture as per the Istanbul Consensus.<sup>21</sup> All  
224 laboratories will vitrify embryos no earlier than day 5. Embryos are suitable for transfer or  
225 vitrification on day 5 provided they are graded 311 as per the Istanbul Consensus.<sup>21</sup> Embryos  
226 utilized for transfer or cryopreservation will be pictured and recorded in the patient file. All  
227 the recorded pictures from all centres will undergo blind grading by two independent  
228 experienced embryologists.

## 229 **Embryo Transfer**

230 Women will undergo fresh embryo transfer by replacing one to two embryos on day 5 with  
231 those who replaced embryos on day 3 will be reported as per each centre protocol, except for

1  
2  
3 232 women with reduced uterine cavity or previous preterm birth, they will replace only one  
4  
5 233 embryo. One participating centre will transfer majority of its cases on day 3. This issue will  
6  
7  
8 234 be accounted for by adjusting the analysis by trial site. Embryo transfer will occur under  
9  
10 235 sonographic guidance using Sydney IVF Transfer Set (Cook, US) as per each centre  
11  
12 236 standardized protocol. The rest of the utilizable embryos will undergo vitrification for  
13  
14 237 transfer in subsequent cycles, while we plan to monitor the cumulative live birth resulted  
15  
16 238 from fresh and vitrified-warmed transfer within one year of randomization. Women will test  
17  
18 239 for biochemical pregnancy 14 days after oocyte retrieval with serum hCG level, and will  
19  
20 240 confirm pregnancy at  $\geq$  week 7 of gestation by detection of intrauterine sac with a heartbeat  
21  
22 241 on ultrasound.

## 26 242 **Outcome Measures**

28 243 Each outcome will be calculated including all randomised participants in the arms to which  
29  
30 244 they were allocated, with the exception of implantation rate, which will be interpreted  
31  
32 245 cautiously due to concerns over its validity as a measure of treatment effect, and perinatal  
33  
34 246 outcomes, which by definition are only available in the subset of participants achieving live  
35  
36 247 birth. This study will adopt the COMMIT definitions of outcomes,<sup>22</sup> where appropriate.

### 40 248 ***Primary outcome***

42 249 Live birth (delivery of one or more viable infants  $> 20^{\text{th}}$  weeks of gestation).

### 44 250 ***Secondary outcomes***

- 47 251 1) Biochemical pregnancy (positive  $\beta\text{hCG} \geq 10$  IU/L at 14 days after egg retrieval).
- 48 252 2) Clinical pregnancy (registered sacs with a heartbeat on ultrasound  $> 7^{\text{th}}$  weeks of  
51 253 gestation).
- 53 254 3) Ongoing pregnancy (continued viable pregnancy  $> 20^{\text{th}}$  weeks of gestation).
- 55 255 4) Miscarriage (loss of a clinical pregnancy  $\leq 20^{\text{th}}$  weeks of gestation).
- 57 256 5) Term live-birth (i.e. delivery of one or more viable infants  $\geq 37$  weeks of gestation).

- 1  
2  
3 257 6) Preterm Birth (delivery of one or more viable infants < 37<sup>th</sup> weeks of gestation).  
4  
5 258 7) Very preterm birth (delivery of one or more viable infants < 32<sup>nd</sup> weeks of gestation).  
6  
7  
8 259 8) Low birth weight babies (babies with < 2500 gm within 24 hours of delivery)  
9  
10 260 9) Congenital malformation (delivery of congenitally malformed babies).  
11  
12 261 10) Still Birth (delivery of nonviable babies > 20 weeks of gestation).  
13  
14 262 11) Cumulative live birth (registered viable neonates after one fresh plus one vitrified-  
15  
16 263 warmed within one year of randomization).  
17  
18 264 12) Fertilization (presence of 2 pronuclei 17±1 hr after ICSI).  
19  
20 265 13) Embryo cleavage (cleaved embryos per fertilized oocyte).  
21  
22 266 14) Top-quality embryo on day 3 (7-8 cells with appropriate-sizes blastomeres and less than  
23  
24 267 10% fragmentation by volume).  
25  
26 268 15) Blastocyst formation on day 5 or 6 (formed blastocysts per fertilized oocyte).  
27  
28 269 16) Top-quality blastocyst on day 5 (rounded and dense inner cell mass with many  
29  
30 270 trophoctodermal cells creating a connected zone and a blastocoel more than 100% by volume;  
31  
32 271 ≥ 311 grade per fertilized oocyte).  
33  
34 272 17) Cryopreservation (cryopreserved embryos per fertilized oocyte).  
35  
36 273 18) Live-birth-implantation rate (number of viable neonates per number of embryos  
37  
38 274 transferred).  
39  
40 275 19) Utilized embryos (number of cryopreserved plus transferred embryos per fertilized  
41  
42 276 oocyte).  
43  
44 277 20) Top-quality utilized embryos (number of high-quality embryos transferred plus blastocyst  
45  
46 278 cryopreserved of 311 grade per fertilized oocyte).  
47  
48  
49  
50  
51  
52  
53

## 279 **Statistical Analysis**

### 280 ***Sample size estimation***

1  
2  
3 281 The primary analysis will test whether there is an increase or decrease in live birth rate as pH  
4  
5 282 changes, using logistic regression. Supposing an increase from 25% to 35% live birth rate  
6  
7 283 across the tested pH range, a sample size of 680 per group would give 93% per cent power to  
8  
9 284 reject the null at a 1% significance level. If, on the other hand, live birth decreased (e.g. from  
10  
11 285 25% to 15%), then 680 participants per arm would grant more than 99% power at a 5%  
12  
13 286 significance level and 98% power at a 1% level. This is before adjustment for prognostic  
14  
15 287 covariates. This sample size is robust to 5% dropout, yielding > 90% for all scenarios  
16  
17 288 discussed above. Therefore, we anticipate recruiting 2100 participants assigned to the groups  
18  
19 289 at 1:1:1 ratio.  
20  
21  
22

### 23 290 *Analytical methods*

24  
25  
26 291 The study conduct will be according to the intention-to-treat approach, where each participant  
27  
28 292 randomised will be included in the analysis, regardless of protocol deviation. The primary  
29  
30 293 analysis of term live-birth will be conducted using logistic regression, with term live birth  
31  
32 294 event regressed on log(pH), adjusted for study site and participant age, which will be  
33  
34 295 standardised before being entered as a covariate. A secondary analysis of live birth will  
35  
36 296 compare the outcome between each pH group, by replacing log(pH) in the regression model  
37  
38 297 with a dummy variable for treatment group. For secondary outcomes, binary variables will be  
39  
40 298 analysed in an analogous fashion to the primary analysis. Count variables will be analysed  
41  
42 299 using Poisson regression, with zero-inflated models wherever the outcome is undefined for  
43  
44 300 some participants. Again, these will be adjusted for site and age. A 1% significance level will  
45  
46 301 be employed. Due to the short treatment duration, it is anticipated that loss to follow up will  
47  
48 302 be minimal, but if any loss does occur then these participants will be analysed as having  
49  
50 303 negative status for the primary outcome.  
51  
52  
53  
54

### 55 304 **Discussion**

56  
57  
58  
59  
60



1  
2  
3 305 Given the lack of evidence for a superior pH level for human embryo culture and whether  
4  
5 306 the pH level could make a difference in live birth after IVF, this trial is performed. This trial  
6  
7  
8 307 is expected to fill the gap in this area leaving the wishes of manufactures of culture media to  
9  
10 308 a solid base relying on evidence. The trial power is set to be high (>90%, with a 1%  
11  
12 309 significance level) to minimize the risk for uninformative results.

#### 14 310 **Strengths and limitations of this study**

16  
17 311 The study is randomised controlled which reduces the possibility of bias. The study has an  
18  
19 312 independent data monitoring committee with access to the data with no involvement in the  
20  
21 313 study conduct. A possible limitation is that the study will be conducted on ICSI cycles as  
22  
23 314 ICSI is the preferred insemination method in the participating centres. The embryologists will  
24  
25  
26 315 be aware of the culture arms during the study conduct.

#### 28 316 **Funding and conflict of interest**

29  
30 317 The study receives no fund and the authors have no conflict of interest to declare.  
31  
32  
33 318

#### 35 319 **References**

- 37  
38 320 1. Smith A, Tilling K, Nelson SM, et al. Live-Birth Rate Associated With Repeat In Vitro  
39 321 Fertilization Treatment Cycles. *JAMA* 2015;314(24):2654-62. doi:  
40 322 10.1001/jama.2015.17296 [published Online First: 2015/12/31]  
41 323 2. Berntsen S, Söderström-Anttila V, Wennerholm U-B, et al. The health of children  
42 324 conceived by ART: ‘the chicken or the egg?’. *Human Reproduction Update*  
43 325 2019;25(2):137-58. doi: 10.1093/humupd/dmz001  
44 326 3. Pool TB, Schoolfield J, Han D. Human embryo culture media comparisons. *Methods Mol*  
45 327 *Biol* 2012;912:367-86. doi: 10.1007/978-1-61779-971-6\_21 [published Online First:  
46 328 2012/07/26]  
47 329 4. Swain JE. Is there an optimal pH for culture media used in clinical IVF? *Hum Reprod*  
48 330 *Update* 2012;18(3):333-9. doi: 10.1093/humupd/dmr053 [published Online First:  
49 331 2012/02/09]  
50 332 5. Tarahomi M, de Melker AA, van Wely M, et al. pH stability of human preimplantation  
51 333 embryo culture media: effects of culture and batches. *Reprod Biomed Online*  
52 334 2018;37(4):409-14. doi: 10.1016/j.rbmo.2018.08.011 [published Online First:  
53 335 2018/09/20]  
54 336 6. Shalgi R, Kraicer PF, Soferman N. Gases and electrolytes of human follicular fluid. *J*  
55 337 *Reprod Fertil* 1972;28(3):335-40. [published Online First: 1972/03/01]  
56  
57  
58  
59  
60



- 1  
2  
3 338 7. Phillips KP, Leveille MC, Claman P, et al. Intracellular pH regulation in human  
4 339 preimplantation embryos. *Hum Reprod* 2000;15(4):896-904. doi:  
5 340 10.1093/humrep/15.4.896 [published Online First: 2000/03/31]  
6  
7 341 8. FitzHarris G, Siyanov V, Baltz JM. Granulosa cells regulate oocyte intracellular pH  
8 342 against acidosis in preantral follicles by multiple mechanisms. *Development*  
9 343 2007;134(23):4283-95. doi: 10.1242/dev.005272 [published Online First: 2007/11/06]  
10 344 9. Dale B, Menezo Y, Cohen J, et al. Intracellular pH regulation in the human oocyte. *Hum*  
11 345 *Reprod* 1998;13(4):964-70. doi: 10.1093/humrep/13.4.964 [published Online First:  
12 346 1998/06/10]  
13 347 10. Lane M, Baltz JM, Bavister BD. Na<sup>+</sup>/H<sup>+</sup> antiporter activity in hamster embryos is  
14 348 activated during fertilization. *Dev Biol* 1999;208(1):244-52. doi:  
15 349 10.1006/dbio.1999.9198 [published Online First: 1999/03/17]  
16 350 11. Swain JE, Pool TB. New pH-buffering system for media utilized during gamete and  
17 351 embryo manipulations for assisted reproduction. *Reprod Biomed Online*  
18 352 2009;18(6):799-810. [published Online First: 2009/06/06]  
19 353 12. Hentemann M, Mousavi K, Bertheussen K. Differential pH in embryo culture. *Fertil*  
20 354 *Steril* 2011;95(4):1291-4. doi: 10.1016/j.fertnstert.2010.10.018 [published Online  
21 355 First: 2010/11/12]  
22 356 13. Carney EW, Bavister BD. Regulation of hamster embryo development in vitro by carbon  
23 357 dioxide. *Biol Reprod* 1987;36(5):1155-63. doi: 10.1095/biolreprod36.5.1155  
24 358 [published Online First: 1987/06/01]  
25 359 14. Edwards LJ, Williams DA, Gardner DK. Intracellular pH of the mouse preimplantation  
26 360 embryo: amino acids act as buffers of intracellular pH. *Hum Reprod*  
27 361 1998;13(12):3441-8. doi: 10.1093/humrep/13.12.3441 [published Online First:  
28 362 1999/01/14]  
29 363 15. Edwards LJ, Williams DA, Gardner DK. Intracellular pH of the preimplantation mouse  
30 364 embryo: effects of extracellular pH and weak acids. *Mol Reprod Dev* 1998;50(4):434-  
31 365 42. doi: 10.1002/(SICI)1098-2795(199808)50:4<434::AID-MRD7>3.0.CO;2-J  
32 366 [published Online First: 1998/07/21]  
33 367 16. Williams JR. The Declaration of Helsinki and public health. *Bull World Health Organ*  
34 368 2008;86(8):650-2. doi: 10.2471/blt.08.050955 [published Online First: 2008/09/18]  
35 369 17. Schulz KF, Altman DG, Moher D, et al. CONSORT 2010 statement: updated guidelines  
36 370 for reporting parallel group randomised trials. *BMJ* 2010;340:c332. doi:  
37 371 10.1136/bmj.c332 [published Online First: 2010/03/25]  
38 372 18. World Health Organization. WHO laboratory manual for the examination and processing  
39 373 of human semen. 5th ed. Geneva: World Health Organization 2010.  
40 374 19. Palermo G, Joris H, Devroey P, et al. Pregnancies after intracytoplasmic injection of  
41 375 single spermatozoon into an oocyte. *Lancet* 1992;340(8810):17-8. doi: 10.1016/0140-  
42 376 6736(92)92425-f [published Online First: 1992/07/04]  
43 377 20. Mortimer D, Cohen J, Mortimer ST, et al. Cairo consensus on the IVF laboratory  
44 378 environment and air quality: report of an expert meeting. *Reprod Biomed Online*  
45 379 2018;36(6):658-74. doi: 10.1016/j.rbmo.2018.02.005 [published Online First:  
46 380 2018/04/17]  
47 381 21. Medicine ASIR, Embryology ESIG. Istanbul consensus workshop on embryo assessment:  
48 382 proceedings of an expert meeting. *Reprod Biomed Online* 2011;22(6):632-46. doi:  
49 383 10.1016/j.rbmo.2011.02.001 [published Online First: 2011/04/13]  
50 384 22. Duffy JMN, Bhattacharya S, Curtis C, et al. A protocol developing, disseminating and  
51 385 implementing a core outcome set for infertility. *Hum Reprod Open*  
52 386 2018;2018(3):hoy007. doi: 10.1093/hropen/hoy007 [published Online First:  
53 387 2019/03/22]

388

For peer review only

1  
2  
3  
4  
5  
6  
7  
8  
9  
10  
11  
12  
13  
14  
15  
16  
17  
18  
19  
20  
21  
22  
23  
24  
25  
26  
27  
28  
29  
30  
31  
32  
33  
34  
35  
36  
37  
38  
39  
40  
41  
42  
43  
44  
45  
46  
47  
48  
49  
50  
51  
52  
53  
54  
55  
56  
57  
58  
59  
60

# Reporting checklist for protocol of a clinical trial.

Based on the SPIRIT guidelines.

## Instructions to authors

Complete this checklist by entering the page numbers from your manuscript where readers will find each of the items listed below.

Your article may not currently address all the items on the checklist. Please modify your text to include the missing information. If you are certain that an item does not apply, please write "n/a" and provide a short explanation.

Upload your completed checklist as an extra file when you submit to a journal.

In your methods section, say that you used the SPIRIT reporting guidelines, and cite them as:

Chan A-W, Tetzlaff JM, Altman DG, Laupacis A, Gøtzsche PC, Krleža-Jerić K, Hróbjartsson A, Mann H, Dickersin K, Berlin J, Doré C, Parulekar W, Summerskill W, Groves T, Schulz K, Sox H, Rockhold FW, Rennie D, Moher D. SPIRIT 2013 Statement: Defining standard protocol items for clinical trials. *Ann Intern Med.* 2013;158(3):200-207

|                                             |                     | Reporting Item                                                                                               | Page Number |
|---------------------------------------------|---------------------|--------------------------------------------------------------------------------------------------------------|-------------|
| <b>Administrative information</b>           |                     |                                                                                                              |             |
| Title                                       | <a href="#">#1</a>  | Descriptive title identifying the study design, population, interventions, and, if applicable, trial acronym | 1           |
| Trial registration                          | <a href="#">#2a</a> | Trial identifier and registry name. If not yet registered, name of intended registry                         | 2           |
| Trial registration: data set                | <a href="#">#2b</a> | All items from the World Health Organization Trial Registration Data Set                                     | 4           |
| Protocol version                            | <a href="#">#3</a>  | Date and version identifier                                                                                  | 4           |
| Funding                                     | <a href="#">#4</a>  | Sources and types of financial, material, and other support                                                  | 13          |
| Roles and responsibilities: contributorship | <a href="#">#5a</a> | Names, affiliations, and roles of protocol contributors                                                      | 1           |

|    |                           |                     |                                                                    |       |
|----|---------------------------|---------------------|--------------------------------------------------------------------|-------|
| 1  | Roles and                 | <a href="#">#5b</a> | Name and contact information for the trial sponsor                 | 1     |
| 2  | responsibilities:         |                     |                                                                    |       |
| 3  | sponsor contact           |                     |                                                                    |       |
| 4  | information               |                     |                                                                    |       |
| 5  |                           |                     |                                                                    |       |
| 6  |                           |                     |                                                                    |       |
| 7  |                           |                     |                                                                    |       |
| 8  | Roles and                 | <a href="#">#5c</a> | Role of study sponsor and funders, if any, in study design;        | 13    |
| 9  | responsibilities:         |                     | collection, management, analysis, and interpretation of data;      |       |
| 10 | sponsor and funder        |                     | writing of the report; and the decision to submit the report for   |       |
| 11 |                           |                     | publication, including whether they will have ultimate authority   |       |
| 12 |                           |                     | over any of these activities                                       |       |
| 13 |                           |                     |                                                                    |       |
| 14 |                           |                     |                                                                    |       |
| 15 |                           |                     |                                                                    |       |
| 16 | Roles and                 | <a href="#">#5d</a> | Composition, roles, and responsibilities of the coordinating       | 4     |
| 17 | responsibilities:         |                     | centre, steering committee, endpoint adjudication committee,       |       |
| 18 | committees                |                     | data management team, and other individuals or groups              |       |
| 19 |                           |                     | overseeing the trial, if applicable (see Item 21a for data         |       |
| 20 |                           |                     | monitoring committee)                                              |       |
| 21 |                           |                     |                                                                    |       |
| 22 |                           |                     |                                                                    |       |
| 23 |                           |                     |                                                                    |       |
| 24 | <b>Introduction</b>       |                     |                                                                    |       |
| 25 |                           |                     |                                                                    |       |
| 26 |                           |                     |                                                                    |       |
| 27 | Background and            | <a href="#">#6a</a> | Description of research question and justification for undertaking | 2 & 3 |
| 28 | rationale                 |                     | the trial, including summary of relevant studies (published and    |       |
| 29 |                           |                     | unpublished) examining benefits and harms for each intervention    |       |
| 30 |                           |                     |                                                                    |       |
| 31 |                           |                     |                                                                    |       |
| 32 | Background and            | <a href="#">#6b</a> | Explanation for choice of comparators                              | 2 & 3 |
| 33 | rationale: choice of      |                     |                                                                    |       |
| 34 | comparators               |                     |                                                                    |       |
| 35 |                           |                     |                                                                    |       |
| 36 |                           |                     |                                                                    |       |
| 37 | Objectives                | <a href="#">#7</a>  | Specific objectives or hypotheses                                  | 3 & 4 |
| 38 |                           |                     |                                                                    |       |
| 39 |                           |                     |                                                                    |       |
| 40 | Trial design              | <a href="#">#8</a>  | Description of trial design including type of trial (eg, parallel  | 4     |
| 41 |                           |                     | group, crossover, factorial, single group), allocation ratio, and  |       |
| 42 |                           |                     | framework (eg, superiority, equivalence, non-inferiority,          |       |
| 43 |                           |                     | exploratory)                                                       |       |
| 44 |                           |                     |                                                                    |       |
| 45 |                           |                     |                                                                    |       |
| 46 | <b>Methods:</b>           |                     |                                                                    |       |
| 47 | <b>Participants,</b>      |                     |                                                                    |       |
| 48 | <b>interventions, and</b> |                     |                                                                    |       |
| 49 | <b>outcomes</b>           |                     |                                                                    |       |
| 50 |                           |                     |                                                                    |       |
| 51 |                           |                     |                                                                    |       |
| 52 |                           |                     |                                                                    |       |
| 53 | Study setting             | <a href="#">#9</a>  | Description of study settings (eg, community clinic, academic      | 4     |
| 54 |                           |                     | hospital) and list of countries where data will be collected.      |       |
| 55 |                           |                     | Reference to where list of study sites can be obtained             |       |
| 56 |                           |                     |                                                                    |       |
| 57 |                           |                     |                                                                    |       |
| 58 |                           |                     |                                                                    |       |
| 59 |                           |                     |                                                                    |       |
| 60 |                           |                     |                                                                    |       |

|    |                              |                      |                                                                                                                                                                                                                                                                                                                                                                                |         |
|----|------------------------------|----------------------|--------------------------------------------------------------------------------------------------------------------------------------------------------------------------------------------------------------------------------------------------------------------------------------------------------------------------------------------------------------------------------|---------|
| 1  | Eligibility criteria         | <a href="#">#10</a>  | Inclusion and exclusion criteria for participants. If applicable, eligibility criteria for study centres and individuals who will perform the interventions (eg, surgeons, psychotherapists)                                                                                                                                                                                   | 5 & 6   |
| 2  |                              |                      |                                                                                                                                                                                                                                                                                                                                                                                |         |
| 3  |                              |                      |                                                                                                                                                                                                                                                                                                                                                                                |         |
| 4  |                              |                      |                                                                                                                                                                                                                                                                                                                                                                                |         |
| 5  |                              |                      |                                                                                                                                                                                                                                                                                                                                                                                |         |
| 6  | Interventions:               | <a href="#">#11a</a> | Interventions for each group with sufficient detail to allow replication, including how and when they will be administered                                                                                                                                                                                                                                                     | 4 & 5   |
| 7  | description                  |                      |                                                                                                                                                                                                                                                                                                                                                                                |         |
| 8  |                              |                      |                                                                                                                                                                                                                                                                                                                                                                                |         |
| 9  |                              |                      |                                                                                                                                                                                                                                                                                                                                                                                |         |
| 10 | Interventions:               | <a href="#">#11b</a> | Criteria for discontinuing or modifying allocated interventions for a given trial participant (eg, drug dose change in response to harms, participant request, or improving / worsening disease)                                                                                                                                                                               | 4 & 5   |
| 11 | modifications                |                      |                                                                                                                                                                                                                                                                                                                                                                                |         |
| 12 |                              |                      |                                                                                                                                                                                                                                                                                                                                                                                |         |
| 13 |                              |                      |                                                                                                                                                                                                                                                                                                                                                                                |         |
| 14 |                              |                      |                                                                                                                                                                                                                                                                                                                                                                                |         |
| 15 | Interventions:               | <a href="#">#11c</a> | Strategies to improve adherence to intervention protocols, and any procedures for monitoring adherence (eg, drug tablet return; laboratory tests)                                                                                                                                                                                                                              | 4 & 5   |
| 16 | adherence                    |                      |                                                                                                                                                                                                                                                                                                                                                                                |         |
| 17 |                              |                      |                                                                                                                                                                                                                                                                                                                                                                                |         |
| 18 |                              |                      |                                                                                                                                                                                                                                                                                                                                                                                |         |
| 19 |                              |                      |                                                                                                                                                                                                                                                                                                                                                                                |         |
| 20 |                              |                      |                                                                                                                                                                                                                                                                                                                                                                                |         |
| 21 | Interventions:               | <a href="#">#11d</a> | Relevant concomitant care and interventions that are permitted or prohibited during the trial                                                                                                                                                                                                                                                                                  | 9       |
| 22 | concomitant care             |                      |                                                                                                                                                                                                                                                                                                                                                                                |         |
| 23 |                              |                      |                                                                                                                                                                                                                                                                                                                                                                                |         |
| 24 |                              |                      |                                                                                                                                                                                                                                                                                                                                                                                |         |
| 25 | Outcomes                     | <a href="#">#12</a>  | Primary, secondary, and other outcomes, including the specific measurement variable (eg, systolic blood pressure), analysis metric (eg, change from baseline, final value, time to event), method of aggregation (eg, median, proportion), and time point for each outcome. Explanation of the clinical relevance of chosen efficacy and harm outcomes is strongly recommended | 10 & 11 |
| 26 |                              |                      |                                                                                                                                                                                                                                                                                                                                                                                |         |
| 27 |                              |                      |                                                                                                                                                                                                                                                                                                                                                                                |         |
| 28 |                              |                      |                                                                                                                                                                                                                                                                                                                                                                                |         |
| 29 |                              |                      |                                                                                                                                                                                                                                                                                                                                                                                |         |
| 30 |                              |                      |                                                                                                                                                                                                                                                                                                                                                                                |         |
| 31 |                              |                      |                                                                                                                                                                                                                                                                                                                                                                                |         |
| 32 |                              |                      |                                                                                                                                                                                                                                                                                                                                                                                |         |
| 33 |                              |                      |                                                                                                                                                                                                                                                                                                                                                                                |         |
| 34 | Participant timeline         | <a href="#">#13</a>  | Time schedule of enrolment, interventions (including any run-ins and washouts), assessments, and visits for participants. A schematic diagram is highly recommended (see Figure)                                                                                                                                                                                               | 8       |
| 35 |                              |                      |                                                                                                                                                                                                                                                                                                                                                                                |         |
| 36 |                              |                      |                                                                                                                                                                                                                                                                                                                                                                                |         |
| 37 |                              |                      |                                                                                                                                                                                                                                                                                                                                                                                |         |
| 38 |                              |                      |                                                                                                                                                                                                                                                                                                                                                                                |         |
| 39 |                              |                      |                                                                                                                                                                                                                                                                                                                                                                                |         |
| 40 | Sample size                  | <a href="#">#14</a>  | Estimated number of participants needed to achieve study objectives and how it was determined, including clinical and statistical assumptions supporting any sample size calculations                                                                                                                                                                                          | 11 & 12 |
| 41 |                              |                      |                                                                                                                                                                                                                                                                                                                                                                                |         |
| 42 |                              |                      |                                                                                                                                                                                                                                                                                                                                                                                |         |
| 43 |                              |                      |                                                                                                                                                                                                                                                                                                                                                                                |         |
| 44 |                              |                      |                                                                                                                                                                                                                                                                                                                                                                                |         |
| 45 | Recruitment                  | <a href="#">#15</a>  | Strategies for achieving adequate participant enrolment to reach target sample size                                                                                                                                                                                                                                                                                            | 4       |
| 46 |                              |                      |                                                                                                                                                                                                                                                                                                                                                                                |         |
| 47 |                              |                      |                                                                                                                                                                                                                                                                                                                                                                                |         |
| 48 |                              |                      |                                                                                                                                                                                                                                                                                                                                                                                |         |
| 49 | <b>Methods: Assignment</b>   |                      |                                                                                                                                                                                                                                                                                                                                                                                |         |
| 50 | <b>of interventions (for</b> |                      |                                                                                                                                                                                                                                                                                                                                                                                |         |
| 51 | <b>controlled trials)</b>    |                      |                                                                                                                                                                                                                                                                                                                                                                                |         |
| 52 |                              |                      |                                                                                                                                                                                                                                                                                                                                                                                |         |
| 53 |                              |                      |                                                                                                                                                                                                                                                                                                                                                                                |         |
| 54 | Allocation: sequence         | <a href="#">#16a</a> | Method of generating the allocation sequence (eg, computer-generated random numbers), and list of any factors for stratification. To reduce predictability of a random sequence, details of any planned restriction (eg, blocking) should be                                                                                                                                   | 5       |
| 55 | generation                   |                      |                                                                                                                                                                                                                                                                                                                                                                                |         |
| 56 |                              |                      |                                                                                                                                                                                                                                                                                                                                                                                |         |
| 57 |                              |                      |                                                                                                                                                                                                                                                                                                                                                                                |         |
| 58 |                              |                      |                                                                                                                                                                                                                                                                                                                                                                                |         |
| 59 |                              |                      |                                                                                                                                                                                                                                                                                                                                                                                |         |
| 60 |                              |                      |                                                                                                                                                                                                                                                                                                                                                                                |         |

provided in a separate document that is unavailable to those who enrol participants or assign interventions

|    |                        |                      |                                                                     |
|----|------------------------|----------------------|---------------------------------------------------------------------|
| 1  |                        |                      |                                                                     |
| 2  |                        |                      |                                                                     |
| 3  |                        |                      |                                                                     |
| 4  | Allocation             | <a href="#">#16b</a> | Mechanism of implementing the allocation sequence (eg, central      |
| 5  | concealment            |                      | telephone; sequentially numbered, opaque, sealed envelopes),        |
| 6  |                        |                      | describing any steps to conceal the sequence until interventions    |
| 7  | mechanism              |                      | are assigned                                                        |
| 8  |                        |                      |                                                                     |
| 9  |                        |                      |                                                                     |
| 10 |                        |                      |                                                                     |
| 11 | Allocation:            | <a href="#">#16c</a> | Who will generate the allocation sequence, who will enrol           |
| 12 | implementation         |                      | participants, and who will assign participants to interventions     |
| 13 |                        |                      |                                                                     |
| 14 | Blinding (masking)     | <a href="#">#17a</a> | Who will be blinded after assignment to interventions (eg, trial    |
| 15 |                        |                      | participants, care providers, outcome assessors, data analysts),    |
| 16 |                        |                      | and how                                                             |
| 17 |                        |                      |                                                                     |
| 18 |                        |                      |                                                                     |
| 19 |                        |                      |                                                                     |
| 20 | Blinding (masking):    | <a href="#">#17b</a> | If blinded, circumstances under which unblinding is permissible,    |
| 21 | emergency unblinding   |                      | and procedure for revealing a participant's allocated intervention  |
| 22 |                        |                      | during the trial                                                    |
| 23 |                        |                      |                                                                     |
| 24 |                        |                      |                                                                     |
| 25 | <b>Methods: Data</b>   |                      |                                                                     |
| 26 | <b>collection,</b>     |                      |                                                                     |
| 27 | <b>management, and</b> |                      |                                                                     |
| 28 | <b>analysis</b>        |                      |                                                                     |
| 29 |                        |                      |                                                                     |
| 30 |                        |                      |                                                                     |
| 31 |                        |                      |                                                                     |
| 32 | Data collection plan   | <a href="#">#18a</a> | Plans for assessment and collection of outcome, baseline, and       |
| 33 |                        |                      | other trial data, including any related processes to promote data   |
| 34 |                        |                      | quality (eg, duplicate measurements, training of assessors) and a   |
| 35 |                        |                      | description of study instruments (eg, questionnaires, laboratory    |
| 36 |                        |                      | tests) along with their reliability and validity, if known.         |
| 37 |                        |                      | Reference to where data collection forms can be found, if not in    |
| 38 |                        |                      | the protocol                                                        |
| 39 |                        |                      |                                                                     |
| 40 |                        |                      |                                                                     |
| 41 |                        |                      |                                                                     |
| 42 |                        |                      |                                                                     |
| 43 | Data collection plan:  | <a href="#">#18b</a> | Plans to promote participant retention and complete follow-up,      |
| 44 | retention              |                      | including list of any outcome data to be collected for participants |
| 45 |                        |                      | who discontinue or deviate from intervention protocols              |
| 46 |                        |                      |                                                                     |
| 47 |                        |                      |                                                                     |
| 48 | Data management        | <a href="#">#19</a>  | Plans for data entry, coding, security, and storage, including any  |
| 49 |                        |                      | related processes to promote data quality (eg, double data entry;   |
| 50 |                        |                      | range checks for data values). Reference to where details of data   |
| 51 |                        |                      | management procedures can be found, if not in the protocol          |
| 52 |                        |                      |                                                                     |
| 53 |                        |                      |                                                                     |
| 54 |                        |                      |                                                                     |
| 55 | Statistics: outcomes   | <a href="#">#20a</a> | Statistical methods for analysing primary and secondary             |
| 56 |                        |                      | outcomes. Reference to where other details of the statistical       |
| 57 |                        |                      | analysis plan can be found, if not in the protocol                  |
| 58 |                        |                      |                                                                     |
| 59 |                        |                      |                                                                     |
| 60 |                        |                      |                                                                     |

|    |                            |                      |                                                                    |         |
|----|----------------------------|----------------------|--------------------------------------------------------------------|---------|
| 1  | Statistics: additional     | <a href="#">#20b</a> | Methods for any additional analyses (eg, subgroup and adjusted     | 11 & 12 |
| 2  | analyses                   |                      | analyses)                                                          |         |
| 3  |                            |                      |                                                                    |         |
| 4  | Statistics: analysis       | <a href="#">#20c</a> | Definition of analysis population relating to protocol non-        | 11 & 12 |
| 5  | population and missing     |                      | adherence (eg, as randomised analysis), and any statistical        |         |
| 6  | data                       |                      | methods to handle missing data (eg, multiple imputation)           |         |
| 7  |                            |                      |                                                                    |         |
| 8  |                            |                      |                                                                    |         |
| 9  |                            |                      |                                                                    |         |
| 10 | <b>Methods: Monitoring</b> |                      |                                                                    |         |
| 11 |                            |                      |                                                                    |         |
| 12 | Data monitoring:           | <a href="#">#21a</a> | Composition of data monitoring committee (DMC); summary of         | 4       |
| 13 | formal committee           |                      | its role and reporting structure; statement of whether it is       |         |
| 14 |                            |                      | independent from the sponsor and competing interests; and          |         |
| 15 |                            |                      | reference to where further details about its charter can be found, |         |
| 16 |                            |                      | if not in the protocol. Alternatively, an explanation of why a     |         |
| 17 |                            |                      | DMC is not needed                                                  |         |
| 18 |                            |                      |                                                                    |         |
| 19 |                            |                      |                                                                    |         |
| 20 |                            |                      |                                                                    |         |
| 21 |                            |                      |                                                                    |         |
| 22 | Data monitoring:           | <a href="#">#21b</a> | Description of any interim analyses and stopping guidelines,       | 4, 11 & |
| 23 | interim analysis           |                      | including who will have access to these interim results and make   | 12      |
| 24 |                            |                      | the final decision to terminate the trial                          |         |
| 25 |                            |                      |                                                                    |         |
| 26 |                            |                      |                                                                    |         |
| 27 | Harms                      | <a href="#">#22</a>  | Plans for collecting, assessing, reporting, and managing solicited | 4       |
| 28 |                            |                      | and spontaneously reported adverse events and other unintended     |         |
| 29 |                            |                      | effects of trial interventions or trial conduct                    |         |
| 30 |                            |                      |                                                                    |         |
| 31 |                            |                      |                                                                    |         |
| 32 |                            |                      |                                                                    |         |
| 33 | Auditing                   | <a href="#">#23</a>  | Frequency and procedures for auditing trial conduct, if any, and   | 4       |
| 34 |                            |                      | whether the process will be independent from investigators and     |         |
| 35 |                            |                      | the sponsor                                                        |         |
| 36 |                            |                      |                                                                    |         |
| 37 |                            |                      |                                                                    |         |
| 38 | <b>Ethics and</b>          |                      |                                                                    |         |
| 39 | <b>dissemination</b>       |                      |                                                                    |         |
| 40 |                            |                      |                                                                    |         |
| 41 |                            |                      |                                                                    |         |
| 42 | Research ethics            | <a href="#">#24</a>  | Plans for seeking research ethics committee / institutional review | 4       |
| 43 | approval                   |                      | board (REC / IRB) approval                                         |         |
| 44 |                            |                      |                                                                    |         |
| 45 |                            |                      |                                                                    |         |
| 46 | Protocol amendments        | <a href="#">#25</a>  | Plans for communicating important protocol modifications (eg,      | 4       |
| 47 |                            |                      | changes to eligibility criteria, outcomes, analyses) to relevant   |         |
| 48 |                            |                      | parties (eg, investigators, REC / IRBs, trial participants, trial  |         |
| 49 |                            |                      | registries, journals, regulators)                                  |         |
| 50 |                            |                      |                                                                    |         |
| 51 |                            |                      |                                                                    |         |
| 52 |                            |                      |                                                                    |         |
| 53 | Consent or assent          | <a href="#">#26a</a> | Who will obtain informed consent or assent from potential trial    | 4       |
| 54 |                            |                      | participants or authorised surrogates, and how (see Item 32)       |         |
| 55 |                            |                      |                                                                    |         |
| 56 |                            |                      |                                                                    |         |
| 57 |                            |                      |                                                                    |         |
| 58 |                            |                      |                                                                    |         |
| 59 |                            |                      |                                                                    |         |
| 60 |                            |                      |                                                                    |         |



|    |                          |                      |                                                                      |     |
|----|--------------------------|----------------------|----------------------------------------------------------------------|-----|
| 1  | Consent or assent:       | <a href="#">#26b</a> | Additional consent provisions for collection and use of              | 4   |
| 2  | ancillary studies        |                      | participant data and biological specimens in ancillary studies, if   |     |
| 3  |                          |                      | applicable                                                           |     |
| 4  |                          |                      |                                                                      |     |
| 5  |                          |                      |                                                                      |     |
| 6  | Confidentiality          | <a href="#">#27</a>  | How personal information about potential and enrolled                | 4   |
| 7  |                          |                      | participants will be collected, shared, and maintained in order to   |     |
| 8  |                          |                      | protect confidentiality before, during, and after the trial          |     |
| 9  |                          |                      |                                                                      |     |
| 10 |                          |                      |                                                                      |     |
| 11 | Declaration of interests | <a href="#">#28</a>  | Financial and other competing interests for principal investigators  | 13  |
| 12 |                          |                      | for the overall trial and each study site                            |     |
| 13 |                          |                      |                                                                      |     |
| 14 |                          |                      |                                                                      |     |
| 15 | Data access              | <a href="#">#29</a>  | Statement of who will have access to the final trial dataset, and    | 4   |
| 16 |                          |                      | disclosure of contractual agreements that limit such access for      |     |
| 17 |                          |                      | investigators                                                        |     |
| 18 |                          |                      |                                                                      |     |
| 19 |                          |                      |                                                                      |     |
| 20 | Ancillary and post trial | <a href="#">#30</a>  | Provisions, if any, for ancillary and post-trial care, and for       | 4   |
| 21 | care                     |                      | compensation to those who suffer harm from trial participation       |     |
| 22 |                          |                      |                                                                      |     |
| 23 |                          |                      |                                                                      |     |
| 24 | Dissemination policy:    | <a href="#">#31a</a> | Plans for investigators and sponsor to communicate trial results     | 4   |
| 25 | trial results            |                      | to participants, healthcare professionals, the public, and other     |     |
| 26 |                          |                      | relevant groups (eg, via publication, reporting in results           |     |
| 27 |                          |                      | databases, or other data sharing arrangements), including any        |     |
| 28 |                          |                      | publication restrictions                                             |     |
| 29 |                          |                      |                                                                      |     |
| 30 |                          |                      |                                                                      |     |
| 31 |                          |                      |                                                                      |     |
| 32 |                          |                      |                                                                      |     |
| 33 | Dissemination policy:    | <a href="#">#31b</a> | Authorship eligibility guidelines and any intended use of            | 1   |
| 34 | authorship               |                      | professional writers                                                 |     |
| 35 |                          |                      |                                                                      |     |
| 36 |                          |                      |                                                                      |     |
| 37 | Dissemination policy:    | <a href="#">#31c</a> | Plans, if any, for granting public access to the full protocol,      | n/a |
| 38 | reproducible research    |                      | participant-level dataset, and statistical code                      |     |
| 39 |                          |                      |                                                                      |     |
| 40 |                          |                      |                                                                      |     |
| 41 | <b>Appendices</b>        |                      |                                                                      |     |
| 42 |                          |                      |                                                                      |     |
| 43 | Informed consent         | <a href="#">#32</a>  | Model consent form and other related documentation given to          | 4   |
| 44 | materials                |                      | participants and authorised surrogates                               |     |
| 45 |                          |                      |                                                                      |     |
| 46 |                          |                      |                                                                      |     |
| 47 | Biological specimens     | <a href="#">#33</a>  | Plans for collection, laboratory evaluation, and storage of          | n/a |
| 48 |                          |                      | biological specimens for genetic or molecular analysis in the        |     |
| 49 |                          |                      | current trial and for future use in ancillary studies, if applicable |     |
| 50 |                          |                      |                                                                      |     |
| 51 |                          |                      |                                                                      |     |

The SPIRIT checklist is distributed under the terms of the Creative Commons Attribution License CC-BY-ND 3.0. This checklist was completed on 09. September 2019 using <https://www.goodreports.org/>, a tool made by the [EQUATOR Network](#) in collaboration with [Penelope.ai](#)



# BMJ Open

## Triple-arm Trial of pH (Tri-pH) Effect on Live birth After ICSI: Protocol of a randomised controlled trial

|                                 |                                                                                                                                                                                                                                                                                                                                                                                                                                                                                                                                                                                                                                                                                                                                                   |
|---------------------------------|---------------------------------------------------------------------------------------------------------------------------------------------------------------------------------------------------------------------------------------------------------------------------------------------------------------------------------------------------------------------------------------------------------------------------------------------------------------------------------------------------------------------------------------------------------------------------------------------------------------------------------------------------------------------------------------------------------------------------------------------------|
| Journal:                        | <i>BMJ Open</i>                                                                                                                                                                                                                                                                                                                                                                                                                                                                                                                                                                                                                                                                                                                                   |
| Manuscript ID                   | bmjopen-2019-034194.R1                                                                                                                                                                                                                                                                                                                                                                                                                                                                                                                                                                                                                                                                                                                            |
| Article Type:                   | Protocol                                                                                                                                                                                                                                                                                                                                                                                                                                                                                                                                                                                                                                                                                                                                          |
| Date Submitted by the Author:   | 19-Nov-2019                                                                                                                                                                                                                                                                                                                                                                                                                                                                                                                                                                                                                                                                                                                                       |
| Complete List of Authors:       | Fawzy, Mohamed; IbnSina Hospital, Ibsina IVF Centre; Banon IVF Centre<br>Emad, Mai; IbnSina Hospital, Ibsina IVF Centre; Banon IVF Centre<br>Wilkinson, Jack; University of Manchester, Centre for Biostatistics; Salford Royal NHS Foundation Trust, Research and Development<br>Mansour, Ragaa; Egyptian IVF-ET Center<br>Mahran, Ali; Assiut University Faculty of Medicine, Department of Dermatology, Venereology and Andrology<br>Fetih, Ahmed; Assiut University Faculty of Medicine, Department of Obstetrics and Gynecology<br>Abdelrahman , Mohamed; Sohag University Faculty of Medicine, Department of Obstetrics and Gynecology<br>AbdelGhafar, Hazem; Sohag University Faculty of Medicine, Department of Obstetrics and Gynecology |
| <b>Primary Subject Heading</b>: | Obstetrics and gynaecology                                                                                                                                                                                                                                                                                                                                                                                                                                                                                                                                                                                                                                                                                                                        |
| Secondary Subject Heading:      | Reproductive medicine, Obstetrics and gynaecology                                                                                                                                                                                                                                                                                                                                                                                                                                                                                                                                                                                                                                                                                                 |
| Keywords:                       | Embryo culture, pH level, culture media, blastocyst formation                                                                                                                                                                                                                                                                                                                                                                                                                                                                                                                                                                                                                                                                                     |
|                                 |                                                                                                                                                                                                                                                                                                                                                                                                                                                                                                                                                                                                                                                                                                                                                   |

SCHOLARONE™  
Manuscripts



I, the Submitting Author has the right to grant and does grant on behalf of all authors of the Work (as defined in the below author licence), an exclusive licence and/or a non-exclusive licence for contributions from authors who are: i) UK Crown employees; ii) where BMJ has agreed a CC-BY licence shall apply, and/or iii) in accordance with the terms applicable for US Federal Government officers or employees acting as part of their official duties; on a worldwide, perpetual, irrevocable, royalty-free basis to BMJ Publishing Group Ltd ("BMJ") its licensees and where the relevant Journal is co-owned by BMJ to the co-owners of the Journal, to publish the Work in this journal and any other BMJ products and to exploit all rights, as set out in our [licence](#).

The Submitting Author accepts and understands that any supply made under these terms is made by BMJ to the Submitting Author unless you are acting as an employee on behalf of your employer or a postgraduate student of an affiliated institution which is paying any applicable article publishing charge ("APC") for Open Access articles. Where the Submitting Author wishes to make the Work available on an Open Access basis (and intends to pay the relevant APC), the terms of reuse of such Open Access shall be governed by a Creative Commons licence – details of these licences and which [Creative Commons](#) licence will apply to this Work are set out in our licence referred to above.

Other than as permitted in any relevant BMJ Author's Self Archiving Policies, I confirm this Work has not been accepted for publication elsewhere, is not being considered for publication elsewhere and does not duplicate material already published. I confirm all authors consent to publication of this Work and authorise the granting of this licence.

## pH-Study Protocol

### **Title: Triple-arm Trial of pH (Tri-pH) Effect on Live birth After ICSI: Protocol of A Randomised Controlled Trial**

Mohamed Fawzy,<sup>ab</sup> Mai Emad,<sup>ab</sup> Jack Wilkinson,<sup>c</sup> Ragaa Mansour,<sup>d</sup> Ali Mahran,<sup>d</sup> Ahmed  
N. Fetih,<sup>f</sup> Mohamed Y. AbdelRahman,<sup>g</sup> Hazem Abdelghafar,<sup>g</sup>

*IbnSina IVF Centre, Sohag and Banon IVF Centre, Assuit, Egypt*

<sup>a</sup>IbnSina IVF Centre, IbnSina Hospital, Sohag, Egypt; <sup>b</sup>Banon IVF Centre, Assiut, Egypt;  
<sup>c</sup>Centre for Biostatistics, University of Manchester, UK; <sup>d</sup>Egyptian IVF-ET Centre, Cairo,  
Egypt; <sup>e</sup>Department of Dermatology, Venereology and Andrology, Faculty of Medicine,  
Assiut University, Egypt; <sup>f</sup>Department of Obstetrics and Gynecology, Faculty of Medicine,  
Assiut University, Egypt; <sup>g</sup>Department of Obstetrics and Gynecology, Faculty of Medicine,  
Sohag University, Egypt

Corresponding Author: Dr. Mohamed Fawzy, IVF Laboratory Director (IbnSina and Banon  
IVF Centres), IbnSina Hospital, 146 El Aref Square, Sohag, Egypt; Cell: +201011122286; E-  
mail: [drfawzy001@me.com](mailto:drfawzy001@me.com)

## Abstract

### Introduction

The pH of culture media for human in vitro fertilization (IVF) is a potential stressor that can affect pre- and post-implantation embryonic growth. There has been no clear evidence about the level that can support in vitro human embryo development optimally. Most manufactures of culture media have specified a range of 7.2 to 7.4, and routine practice is to use a level of 7.25 to 7.3 pH. However, these recommendations resulted from designers' opinions or experiments on mice models. There has been no randomised trial to search for the effect of pH level on live birth rate after IVF. The aim of this trial is to examine if there is an effect on live birth rate using three different levels of pH.

### Methods and analysis

This multicentre randomised trial will involve centres specialised in IVF in Egypt. Eligible women amenable for intracytoplasmic sperm injection (ICSI) will be randomized to undergo in vitro culture in either 7.2, 7.3 or 7.4 pH level. The study is designed to detect 10% difference in live birth rate with 93% per cent power at 1% significance level.

### Ethics and dissemination

Ethics review boards of the participating centres approved the study and eligible women will sign written informed consent before enrolment. The study has established an independent data monitoring and safety committee from international experts in the field and in trial design.

**Trial registration number** NCT02896777.

### Keywords

Embryo culture, pH level, culture media, blastocyst formation

1  
2  
3  
4 55  
5 56  
6 57

### Strengths and limitations of this study

- 8 58
- The study is randomised controlled which reduces the possibility of bias.
- 10 59
- The study has an independent data monitoring committee with access to the data with
- 12 60
- no involvement in the study conduct.
- 14 61
- A possible limitation is that the study will be conducted on ICSI cycles as ICSI is the
- 16 62
- preferred insemination method in the participating centres.
- 18 63
- The embryologists will be aware of the culture arms during the study conduct.
- 20 64

### Background

22 64

23 65

24 66

25 66

26 67

27 67

28 68

29 68

30 69

31 69

32 69

33 69

34 70

35 70

36 71

37 71

38 72

39 72

40 73

41 73

42 74

43 74

44 75

45 75

46 76

47 76

48 77

49 77

50 78

51 78

52 79

53 79

54 80

55 80

56 81

57 81

58 81

59 81

81

Assisted reproductive techniques (ART) result in around 65% cumulative live birth within six cycles of *in vitro* fertilisation (IVF),<sup>1</sup> which is relatively suboptimal. In addition, IVF results in adverse perinatal outcomes, such as preterm birth and low birth weight babies compared with the *in vivo* conception.<sup>2</sup> These outcomes can rely on factors relating to patients, stimulation, and *in vitro* culture elements. In relation to embryo culture conditions, over 200 variables have been identified as being potentially relevant to the cycle outcome.<sup>3</sup> One element that may influence embryo development *in vitro* is the pH level of a culture medium, which thus far has been determined by manufacturers of culture media without recourse to a well-powered randomized clinical trial (RCT).<sup>4</sup> The pH levels are potential stressors that vary between media brands and from batch-to-batch depending on the bicarbonate level in culture media and on the CO<sub>2</sub> level of incubators.<sup>5</sup> This would suggest that pH level can vary between incubators within the same laboratory if it is not well adjusted. Recommendations for measuring pH for embryo culture are variable between daily to monthly measurement.<sup>4</sup> Oocytes and embryos have intracellular (pHi), which is modulated by the extracellular pH (pHe).<sup>6</sup> The *in vitro* conditions including concentrations of bicarbonates, proteins, amino acids in culture media and the CO<sub>2</sub> of incubators affect the pHe, which is a potential stressor.<sup>7</sup>

1  
2  
3 82 The mechanism of pHi in oocyte and embryo is complex, regulating enzymatic activity, cell  
4  
5 83 division and differentiation, protein synthesis, metabolism, mitochondrial function,  
6  
7 84 cytoskeletal regulation, and microtubule dynamics.<sup>7,8</sup> Drifts in pHe translate into changes in  
8  
9 85 pHi, which can adversely affect cell function if the compensatory mechanisms failed to adapt  
10  
11 86 to restore pHi to a safe level.<sup>8</sup> The pHi can compensate through an active exchange among  
12  
13 87 Na<sup>+</sup>, HCO<sub>3</sub><sup>-</sup>/Cl<sup>-</sup> and Na<sup>+</sup>/H<sup>+</sup> to maintain it between 7 to 7.3.<sup>5,8</sup> Denuded oocyte for ICSI  
14  
15 88 through fertilization thereafter and vitrified-warmed embryos lack robust compensatory  
16  
17 89 mechanisms of pHi; therefore, drastic differences between pHe and pHi in these scenarios  
18  
19 90 can significantly perturbate embryo development.<sup>9-11</sup>  
20  
21 91 That being said, an optimum level of pH for human embryo culture *in vitro* is still unknown.<sup>4</sup>  
22  
23 92 <sup>9,12-15</sup> Most recommendations rely on mice models or manufacturers of culture media.  
24  
25 93 Theoretically, a wide range of pHe levels (7.0–7.5) are believed to support human embryo  
26  
27 94 development *in vitro*. However, extreme pHe levels can adversely affect oocyte and embryo  
28  
29 95 development.<sup>4</sup> An acidic range of pHe can negative affect the oocyte spindle leading to no  
30  
31 96 fertilization, degeneration or blocking embryo development.<sup>4</sup> An alkaline shift in pHe has the  
32  
33 97 similar adverse effects but lesser than the acidic shift.<sup>4</sup> Recently, there has been anecdotal  
34  
35 98 evidence that culturing embryos at pHe away from 7.2 to 7.4 can lead to mitotic errors.  
36  
37 99 Therefore, the optimal level of pHe for human embryo development is still to be determined.  
38  
39 100 Given the anecdotal evidence that levels between 7.2 to 7.4 pHe can support embryo  
40  
41 101 development with variable results, this multicentre, randomized, clinical trial aims to  
42  
43 102 compare the influence of three commonly used levels of pH (7.2, 7.3 and 7.4) on live birth  
44  
45 103 rate after ICSI, in order to investigate the potential for optimisation.  
46  
47  
48  
49  
50  
51  
52  
53

#### 104 **Methods and Design**

54  
55 105 This protocol version one of a multicentre, randomized, triple-arm, triple-blind clinical trial  
56  
57 106 (NCT02896777, registered at [www.ClinicalTrials.gov](http://www.ClinicalTrials.gov)) will compare three levels of pH for  
58  
59  
60

1  
2  
3 107 human embryo culture in vitro on live birth after ICSI (Figure 1). This partially blind design  
4  
5 108 represents that clinicians, participants and outcome assessor, not including the embryologists,  
6  
7  
8 109 will be unaware of the study arms. This multicentre trial will involve private IVF facilities in  
9  
10 110 Egypt (Ibnsina IVF Centre, Egyptian IVF-ET centre, Banon IVF Centre, Qena IVF Centre  
11  
12 111 and Amshaj IVF Centre) with the study protocol in their hand before enrolment of  
13  
14  
15 112 participants. If other IVF facilities join this trial before recruitment, this will be reported in  
16  
17 113 the study.

#### 19 114 **Ethics and dissemination**

21 115 This trial obtained the approval from Ethics Review Board of Upper Egypt IVF Network  
22  
23 116 relating to the participating sites (Approval No. 009/2016). An independent safety and  
24  
25  
26 117 monitoring committee formed of five experts in reproductive endocrinology, reproductive  
27  
28 118 biology, embryo culture, biostatistics and trial methodology will oversee this trial. All  
29  
30 119 participants will receive independent counselling from research instructors who are not  
31  
32  
33 120 involved in patient care or laboratory work. Participants who will accept to participate will  
34  
35 121 sign a written informed consent before enrolment. Conducting this study will be in  
36  
37 122 accordance with the Declaration of Helsinki.<sup>16</sup> The trial reporting will be according to the  
38  
39 123 CONSORT statement,<sup>17</sup> unless other guideline will have higher ranking at that time. No plan  
40  
41 124 exists to amend this protocol and any amendments will be responsibility for the safety  
42  
43 125 committee and will undergo detailed reporting on the trial registry and in the final  
44  
45  
46 126 manuscript.

#### 49 127 **Intervention**

51 128 Oocytes and embryos in the three arms will undergo continuous culture from day 0 through  
52  
53 129 day 5 or 6 without medium renewal. “Arm I” is to culture oocytes and resulting embryos after  
54  
55 130 ICSI in pHe of  $7.2 \pm 0.02$ . Arm II The “Arm II” is to culture oocytes and resulting embryos  
56  
57 131 after ICSI in pHe of  $7.3 \pm 0.02$ . “Arm III” is to culture oocytes and resulting embryos after  
58  
59  
60

1  
2  
3 132 ICSI in pHe of  $7.4 \pm 0.02$ . This trial will include intracytoplasmic sperm injection (ICSI)  
4  
5 133 cycles.

7  
8 **134 Patient and Public Involvement**

9  
10 135 No patient involved

11  
12 **136 Randomization and Masking**

13  
14 137 Using an online tool, participants will be randomised to the experimental arms with a 1:1:1  
15  
16 138 allocation ratio. The allocation sequence of participants will be generated using a permuted  
17  
18 139 block randomization of 3, 6 and 9 block sizes with unique identifiers in random order,  
19  
20 140 stratified by trial site. Randomization of participants and its storage in sequentially numbered,  
21  
22 141 opaque, sealed envelopes will occur by a secretary with no involvement in patient care and  
23  
24 142 will be provided to trial sites before enrolment of first participant. Eligible participants will  
25  
26 143 be allocated to the relevant arms on the day of maturation trigger and allocation result will be  
27  
28 144 communicated to the laboratory team. Participants, clinicians and outcome assessors for the  
29  
30 145 clinical outcomes will be unaware of the allocation, while embryologists who will assess  
31  
32 146 embryo development will be aware of the allocation.

33  
34  
35  
36  
37 **147 Participants**

38  
39 148 The inclusion criteria include:

- 40  
41 149 1) Women age of  $\geq 18$  to  $\leq 40$ ;  
42  
43 150 2) BMI of  $\leq 31$ ;  
44  
45 151 3) Anticipated normal responder ( $\geq 5$  antral follicle count or  $\geq 5.4$  pmol/L AMH);  
46  
47 152 4) Women who have  $\geq 1$  year of primary or secondary infertility;  
48  
49 153 5) Fresh ejaculate sperm of any count provided they have  $\geq 1\%$  normal forms and a motile  
50  
51 154 fraction;  
52  
53 155 6) Women undergoing their first ICSI cycle or their second ICSI cycle after previous  
54  
55 156 successful one;



1  
2  
3 157 7) Women with > 7 mm endometrial thickness at day of trigger;  
4  
5 158 and 8) Women with no detected uterine abnormality on transvaginal ultrasound (e.g.  
6  
7 159 submucosal myomas, polyps or septa).

8  
9  
10 160 ***Women will be excluded if they have:***

- 11  
12 161 1) Unilateral oophorectomy;  
13  
14 162 2) Abnormal karyotyping for them or their male partners;  
15  
16 163 3) History of repeated abortions or implantation failure;  
17  
18 164 4) Uncontrolled diabetes;  
19  
20 165 5) Liver or renal disease;  
21  
22 166 6) History of severe ovarian hyperstimulation;  
23  
24 167 7) History of malignancy or borderline pathology;  
25  
26 168 8) Endometriosis;  
27  
28 169 9) Plan for PGD-A;  
29  
30 170 10) Severe male factor includes surgical sperm retrieval or cryopreserved sperm;  
31  
32 171 and 11) Severe PCOS, hyper-responder, OHSS patients, and cycles with agonist trigger or  
33  
34 172 any patient with a plan for a “freeze-all”.

35  
36  
37  
38  
39  
40 173 **Stimulation Protocol, Oocyte retrieval, and Luteal Phase Support**

41  
42 174 Women will undergo controlled ovarian stimulation with agonist mid-luteal pituitary down-  
43  
44 175 regulation (Decapeptyl® 0.1mg, Ferring, Switzerland) or antagonist (Cetrotide® 0.25 mg,  
45  
46 176 Merck Serono) protocols. Agonist will start on day 19–21 of the preceding cycle and will  
47  
48 177 continue to the day of maturation trigger. For Antagonist group, women will start the  
49  
50 178 antagonist on day 6 of treatment cycle. All women will receive follicular stimulating  
51  
52 179 hormone (rFSH; Gonal-F, Merck Serono) and human menopausal gonadotropin (HMG;  
53  
54 180 Menogon, Ferring) at 150-300 IU with a 2:1 ratio from cycle day 2 through follicular  
55  
56 181 maturation, with adjustment of the dosage according to the response. When  $\geq 3$  follicles  
57  
58  
59  
60

1  
2  
3 182 measure  $\geq 18$  mm mean diameter on ultrasound, women will receive a 10,000 IU hCG trigger  
4  
5 183 shot (Choriomon, IBSA) for final oocyte maturation. Oocyte retrieval will be performed 37  
6  
7 184 hours after hCG trigger under transvaginal sonographic guidance. Follicular aspirates will be  
8  
9 185 handled in HEPES-buffered medium (global® HEPES, LifeGlobal, Canada) at 37°C using  
10  
11 186 tube warmers. Luteal-phase support will be achieved with intramuscular progesterone (100  
12  
13 187 mg/mL [Prontogest, IBSA]) once daily or vaginal pessaries (400 mg prontogest) twice daily,  
14  
15 188 starting on day 1 after retrieval (“day 1”) to 12 weeks of gestation, unless negative  
16  
17 189 pregnancy.

### 18 190 **Sperm Preparation, Oocyte Denudation and ICSI**

19  
20  
21  
22  
23 191 Semen samples will be processed through density gradient,<sup>18</sup> using Puresperm (Nidacon,  
24  
25 192 Sweden). The pellet will undergo once washing and incubation at room temperature in  
26  
27 193 HEPES buffered medium (AllGrade Wash, LifeGlobal). Denudation of oocytes will occur  
28  
29 194 immediately after collection using 40 IU hyaluronidase (LifeGlobal, Canada) diluted in  
30  
31 195 Global HEPES and a stripper of 170 micrometre (Cook, US). Metaphase II (MII) oocytes  
32  
33 196 will undergo ICSI in Global HEPES medium under inverted microscope as previously  
34  
35 197 described.<sup>19</sup>

### 36 198 **Incubator Management and pH Adjustment**

37  
38  
39  
40 199 Incubators for this study involve Labo C-Top (Labotect, Germany), Minc 1000 (Cook, US),  
41  
42 200 and AD-3100 (Astec, Japan). Each centre will use no more than a brand of incubator to  
43  
44 201 account for incubator as variable. If another brand of incubators will be used, we will ensure  
45  
46 202 they are humidified. Dry incubators such as ESCO (Esco Micro Pte. Ltd, Singapore) may be  
47  
48 203 used at some centres; however, we will adjust the analysis by trial site to account for  
49  
50 204 differences between centres. Incubators will undergo stringent control of temperature  
51  
52 205 (36.9±0.1°C). The temperature will be validated daily using a certified thermometer.  
53  
54 206 Incubator’s CO<sub>2</sub> and O<sub>2</sub> will be measured daily using a certified gas analyser to ensure 5% O<sub>2</sub>  
55  
56  
57  
58  
59  
60

1  
2  
3 207 and a proper CO<sub>2</sub> concentration to achieve the required pH. All the three measurements  
4  
5 208 (temperature, CO<sub>2</sub> level, and pH levels) will be verified by well-trained person traveling  
6  
7 209 across the sites. Incubators will undergo sterilization with 6% H<sub>2</sub>O<sub>2</sub> every four weeks, with  
8  
9 210 installation of inline filters (Green, Lifeglobal, CooperSurgical).<sup>20</sup>  
11  
12 211 A minimum of 3 incubators of a single brand within each participating facility with different  
13  
14 212 levels of pH representing the study arms is obligatory: Incubator A of 7.2±0.02 pH, Incubator  
15  
16 213 B of 7.3±0.02 pH, and Incubator C of 7.4±0.02. The three incubators will undergo a strict  
17  
18 214 adjustment of the required pH using a handheld blood gas analyser (Epoc® Reader and Host;  
19  
20 215 BGEM card US). Constant pH levels will be ensured with twice weekly measurement of pH  
21  
22 216 with blood gas analyser and a daily measurement of CO<sub>2</sub> level of incubators. Measurement of  
23  
24 217 pH will occur after an overnight incubation of 1mL culture media in a central well dish  
25  
26 218 covered with 0.4mL of oil. In the morning and before opening of incubators, the handheld  
27  
28 219 blood gas analyser (Epoc® Reader and Host; BGEM card US) will undergo preparation for  
29  
30 220 measuring pH as per the manufacturer protocol. Briefly, after switching on the device,  
31  
32 221 calibration of the device automatically occurs. Next, we adjust the temperature to 37°C, and  
33  
34 222 select the sample as arterial. Next, we insert the card, which undergoes automatic calibration.  
35  
36 223 Next, when the device is ready, it asks to inject sample. Next, using 1mL syringe attached to  
37  
38 224 wide needle calibre, we aspirate 0.5mL of the culture medium under oil. Next, we discard the  
39  
40 225 first droplet and smoothly inject the sample until the beep. We can see the results of pH,  
41  
42 226 partial CO<sub>2</sub> and O<sub>2</sub> pressures thereafter. Each laboratory will report the results to also  
43  
44 227 compare the resulting partial pressures of CO<sub>2</sub> and O<sub>2</sub> with the incubator display. pH will also  
45  
46 228 be measured every new batch of a culture medium. The measurement of pH and CO<sub>2</sub> across  
47  
48 229 the centres will be performed using a one-brand equipment that will undergo periodic  
49  
50 230 calibration together. To account for errors in measurement, one well-trained personnel will be  
51  
52 231 assigned to measure the pH and double check the CO<sub>2</sub> level across the centres.  
53  
54  
55  
56  
57  
58  
59  
60

232

233

### 234 **Culture Protocol and Embryo Scoring**

235 Each culture dish (micro-droplet, Vitrolife) will hold 12 droplets of 20 µl each from Global  
236 Total culture medium (Lifeglobal, CooperSurgical, US) overlaid with 5 ml of oil (NidOil,  
237 Nidacon). If a decision to change culture media at any time point of the study conduct is  
238 made, this will be performed at the same time across the study sites. Dishes will undergo  
239 overnight incubation in the relevant incubator adjusted to the relevant pH as per the  
240 randomization. After ICSI, the injected oocytes will undergo washing in culture medium  
241 followed by incubation from day 0 through day 5 or 6 in the relevant arm of pH, except for a  
242 small portion of embryos transferred on day 3. The inseminated oocytes will undergo culture  
243 in groups of 3 each from days 0 to 5/6, with removal of the unfertilized, abnormally fertilized  
244 or degenerated oocytes at fertilization check. Two embryologists will perform the  
245 fertilization check and embryo grading on day 1, 2 and 3 of culture as per the Istanbul  
246 Consensus.<sup>21</sup> All laboratories will vitrify embryos no earlier than day 5. Embryos are suitable  
247 for transfer or vitrification on day 5 provided they are graded 311 as per the Istanbul  
248 Consensus.<sup>21</sup> Embryos utilized for transfer or cryopreservation will be pictured and recorded  
249 in the patient file. All the recorded pictures from all centres will undergo blind grading by  
250 two independent experienced embryologists.

### 251 **Embryo Transfer**

252 Women will undergo fresh embryo transfer by replacing one to two embryos on day 5 with  
253 those who replaced embryos on day 3 will be reported as per each centre protocol, except for  
254 women with reduced uterine cavity or previous preterm birth, they will replace only one  
255 embryo. One participating centre will transfer majority of its cases on day 3. This issue will  
256 be accounted for by adjusting the analysis by trial site. Embryo transfer will occur under

1  
2  
3 257 sonographic guidance using Sydney IVF Transfer Set (Cook, US) as per each centre  
4  
5 258 standardized protocol. The rest of the utilizable embryos will undergo vitrification for  
6  
7 259 transfer in subsequent cycles, while we plan to monitor the cumulative live birth resulted  
8  
9 260 from fresh and vitrified-warmed transfer within one year of randomization. Women will test  
10  
11 261 for biochemical pregnancy 14 days after oocyte retrieval with serum hCG level, and will  
12  
13 262 confirm pregnancy at  $\geq$  week 7 of gestation by detection of intrauterine sac with a heartbeat  
14  
15 263 on ultrasound.

### 19 264 **Outcome Measures**

21 265 Each outcome will be calculated including all randomised participants in the arms to which  
22  
23 266 they were allocated, with the exception of implantation rate, which will be interpreted  
24  
25 267 cautiously due to concerns over its validity as a measure of treatment effect, and perinatal  
26  
27 268 outcomes, which by definition are only available in the subset of participants achieving live  
28  
29 269 birth. This study will adopt the COMMIT definitions of outcomes,<sup>22</sup> where appropriate.

#### 33 270 **Primary outcome**

35 271 Live birth (delivery of one or more viable infants  $>$  20<sup>th</sup> weeks of gestation).

#### 38 272 **Secondary outcomes**

- 40 273 1) Biochemical pregnancy (positive  $\beta$ hCG  $\geq$  10 IU/L at 14 days after egg retrieval).
- 42 274 2) Clinical pregnancy (registered sacs with a heartbeat on ultrasound  $>$  7<sup>th</sup> weeks of  
44 275 gestation).
- 46 276 3) Ongoing pregnancy (continued viable pregnancy  $>$  20<sup>th</sup> weeks of gestation).
- 48 277 4) Miscarriage (loss of a clinical pregnancy  $\leq$  20<sup>th</sup> weeks of gestation).
- 50 278 5) Term live-birth (i.e. delivery of one or more viable infants  $\geq$ 37 weeks of gestation).
- 52 279 6) Preterm Birth (delivery of one or more viable infants  $<$  37<sup>th</sup> weeks of gestation).
- 54 280 7) Very preterm birth (delivery of one or more viable infants  $<$  32<sup>nd</sup> weeks of gestation).
- 56 281 8) Low birth weight babies (babies with  $<$  2500 gm within 24 hours of delivery)

- 1  
2  
3 282 9) Congenital malformation (delivery of congenitally malformed babies).  
4  
5 283 10) Still Birth (delivery of nonviable babies > 20 weeks of gestation).  
6  
7 284 11) Cumulative live birth (registered viable neonates after one fresh plus one vitrified-  
8  
9 warmed within one year of randomization).  
10  
11 285  
12 286 12) Fertilization (presence of 2 pronuclei 17±1 hr after ICSI).  
13  
14 287 13) Embryo cleavage (cleaved embryos per fertilized oocyte).  
15  
16 288 14) Top-quality embryo on day 3 (7-8 cells with appropriate-sizes blastomeres and less than  
17  
18 289 10% fragmentation by volume).  
19  
20 290 15) Blastocyst formation on day 5 or 6 (formed blastocysts per fertilized oocyte).  
21  
22 291 16) Top-quality blastocyst on day 5 (rounded and dense inner cell mass with many  
23  
24 292 trophoctodermal cells creating a connected zone and a blastocoel more than 100% by volume;  
25  
26 293 ≥ 311 grade per fertilized oocyte).  
27  
28 294 17) Cryopreservation (cryopreserved embryos per fertilized oocyte).  
29  
30 295 18) Live-birth-implantation rate (live birth per embryo transferred).  
31  
32 296 19) Utilized embryos (number of cryopreserved plus transferred embryos per fertilized  
33  
34 297 oocyte).  
35  
36 298 20) Top-quality utilized embryos (number of high-quality embryos transferred plus blastocyst  
37  
38 299 cryopreserved of 311 grade per fertilized oocyte).  
39  
40  
41  
42  
43

## 300 **Statistical Analysis**

### 301 ***Sample size estimation***

302 This is a three-arm study looking at pH over a range of 7.2 to 7.4. The hypothesis to be tested  
303 is that adjusting the pH value to the edges of this range might result in improvements to the  
304 live birth rate, although we remain in equipoise as to whether higher or lower values will be  
305 optimal. On the basis of internal data, live birth rates in the region of 25-35% are typical, and  
306 our goal is to investigate whether this is associated with varying pH.

1  
2  
3 307 The study has been powered for a global test of the effect of pH, calculated using plausible  
4  
5 308 birth rates in the three groups of 25%, 30%, and 35%. 646 participants per arm yields 98%  
6  
7 309 power in this scenario, using a 5% significance level. This test makes no assumption about  
8  
9 310 the ordering of the live birth rates in relation to the ordering of the pH values. The high power  
10  
11 311 level has been adopted to allow for some leeway in relation to the minimum effect size. For  
12  
13 312 illustration, if the birth rates were slightly less distinct, with 26%, 30%, 33% (a spread of just  
14  
15 313 seven percentage points) this sample size yields 85% power against a 5% significance level,  
16  
17 314 and 65% at a 1% significance level. We have also been conservative in our inflation of  
18  
19 315 numbers for dropout. We have allowed for 5% loss to follow up, inflating our group size to  
20  
21 316 680. In reality, we will conduct analysis on an intention to treat basis, including all  
22  
23 317 randomised women. Women who do not complete treatment (for example, they do not  
24  
25 318 undergo embryo transfer) will be counted as not having a live birth. The only exceptions to  
26  
27 319 this will be participants who withdraw consent for their data to be used in the study. Our  
28  
29 320 inflation for loss to follow up reflects this possibility.  
30  
31 321 We also note that adjustment for site and age in the analysis will increase power further.  
32  
33  
34  
35  
36  
37  
38  
39

### 40 323 *Analytical methods*

41  
42 324 The study conduct will be according to the intention-to-treat approach, where each participant  
43  
44 325 randomised will be included in the analysis, regardless of protocol deviation. The primary  
45  
46 326 analysis of live birth will be conducted using logistic regression, with live birth event  
47  
48 327 regressed on pH group, adjusted for study site and participant age, which will be standardised  
49  
50 328 before being entered as a covariate. pH will be entered as a categorical covariate, allowing a  
51  
52 329 Likelihood Ratio test of the association between pH and live birth rate across the three groups  
53  
54 330 to be performed. Secondary supportive analyses will be conducted to try to characterise the  
55  
56 331 nature of any association. This will include a test of linear trend in live birth rates across pH  
57  
58  
59  
60



1  
2  
3 332 groups, which would imply an optimal pH level for the lowest or highest value, as well as  
4  
5 333 pairwise comparisons between each group (again, these analyses will be adjusted for site and  
6  
7 334 age). The pairwise comparisons will focus on size and precision of the odds ratios. Although  
8  
9  
10 335 it would be desirable to power the study for all pairwise comparisons as the primary outcome,  
11  
12 336 this yields impracticable sample sizes (> 4000 participants) against realistic effects. The study  
13  
14 337 has therefore been designed to represent the most informative test of the hypothesis that pH  
15  
16 338 level affects live birth, that is practicable.

17  
18  
19 339

20  
21 340 For secondary outcomes, binary variables will be analysed in an analogous fashion to the  
22  
23 341 primary analysis. Count variables will be analysed using Poisson regression, with zero-  
24  
25 342 inflated models wherever the outcome is structurally undefined for some participants. Again,  
26  
27 343 these will be adjusted for site and age. In the analysis of number of usable embryos,  
28  
29 344 implanted embryos arising from the day 3 transfer will be included as formed and good  
30  
31 345 quality blastocysts, while those that do not implant in this portion will be considered blocked  
32  
33 346 at day 3. The total of the number of embryos transferred and the formed blastocysts will be  
34  
35 347 used to calculate number of utilizable embryos. A 1% significance level will be employed.  
36  
37 348 Due to the short treatment duration, it is anticipated that loss to follow up will be minimal,  
38  
39 349 but if any loss does occur then these participants will be analysed as having negative status  
40  
41 350 for the primary outcome, unless consent to use data is withdrawn. The follow-up period is  
42  
43 351 identified as one year from randomization of the last participant provided that all pregnant  
44  
45 352 women have given birth.

## 51 353 **Discussion**

52  
53 354 Given the lack of evidence for a superior pH level for human embryo culture and whether  
54  
55 355 the pH level could make a difference in live birth after IVF, this trial is performed. This trial  
56  
57 356 is expected to fill the gap in this area leaving the recommendations of manufactures of culture  
58  
59  
60



1  
2  
3 357 media to a solid base relying on evidence. The trial power is set to be high (>90%, with a 1%  
4  
5 358 significance level) to minimize the risk for uninformative results.  
6  
7

### 8 359 **Funding and conflict of interest**

9  
10 360 The study receives no fund and the authors have no conflict of interest to declare.  
11

### 12 361 **Authors' contributions**

13  
14 362 Mohamed is the creator of the concept and design of the study, and is the principal  
15  
16 363 investigator of the study. Mohamed Fawzy is also a supervisor for the study conduct across  
17  
18 364 the sites and will make sure that data is periodically sent to for storage in independent  
19  
20 365 database. Jack Wilkinson is the statistician of the study who revised the study design and  
21  
22 366 calculated the sample size and power of the study and he will be responsible for the data  
23  
24 367 analysis and data transfer to the independent safety and monitoring committee. Mai Emad is a  
25  
26 368 primary investigator at Banon IVF centre and a sub-investigator at Ibsina Centre, and she  
27  
28 369 participated in revising the trial protocol and will participate in trial reporting thereafter.  
29  
30  
31 370 Ragaa Mansour is a primary investigator at the Egyptian IVF-ET Centre, and revised the trial  
32  
33 371 protocol and provided advice during the protocol design. Ali Mahran is the andrologist of the  
34  
35 372 study that will make sure all male partners are in line with the inclusion criteria, and revised  
36  
37 373 the protocol and provided comments. Ahmed Fetih is a primary investigator at Banon IVF  
38  
39 374 Centre and participated revising the protocol and provided comments. Mohamed  
40  
41 375 AbdelRahman participated in the trial design and is a primary investigator at Amshaj IVF  
42  
43 376 Centre. Hazem Abdelghafar is a primary investigator at Ibsina IVF Centre and participated  
44  
45 377 in the trial design. All authors provided comments and agreed on the study design and  
46  
47 378 protocol, and will participate in reporting this trial thereafter.  
48  
49  
50  
51  
52

### 53 379 **References**

54  
55  
56 380 1. Smith A, Tilling K, Nelson SM, et al. Live-Birth Rate Associated With Repeat In Vitro  
57 381 Fertilization Treatment Cycles. *JAMA* 2015;314(24):2654-62. doi:  
58 382 10.1001/jama.2015.17296 [published Online First: 2015/12/31]  
59  
60

- 1  
2  
3 383 2. Berntsen S, Söderström-Anttila V, Wennerholm U-B, et al. The health of children  
4 384 conceived by ART: 'the chicken or the egg?'. *Human Reproduction Update*  
5 385 2019;25(2):137-58. doi: 10.1093/humupd/dmz001
- 6 386 3. Pool TB, Schoolfield J, Han D. Human embryo culture media comparisons. *Methods Mol*  
7 387 *Biol* 2012;912:367-86. doi: 10.1007/978-1-61779-971-6\_21 [published Online First:  
8 388 2012/07/26]
- 9 389 4. Swain JE. Is there an optimal pH for culture media used in clinical IVF? *Hum Reprod*  
10 390 *Update* 2012;18(3):333-9. doi: 10.1093/humupd/dmr053 [published Online First:  
11 391 2012/02/09]
- 12 392 5. Tarahomi M, de Melker AA, van Wely M, et al. pH stability of human preimplantation  
13 393 embryo culture media: effects of culture and batches. *Reprod Biomed Online*  
14 394 2018;37(4):409-14. doi: 10.1016/j.rbmo.2018.08.011 [published Online First:  
15 395 2018/09/20]
- 16 396 6. Shalgi R, Kraicer PF, Soferman N. Gases and electrolytes of human follicular fluid. *J*  
17 397 *Reprod Fertil* 1972;28(3):335-40. [published Online First: 1972/03/01]
- 18 398 7. Phillips KP, Leveille MC, Claman P, et al. Intracellular pH regulation in human  
19 399 preimplantation embryos. *Hum Reprod* 2000;15(4):896-904. doi:  
20 400 10.1093/humrep/15.4.896 [published Online First: 2000/03/31]
- 21 401 8. FitzHarris G, Siyanov V, Baltz JM. Granulosa cells regulate oocyte intracellular pH  
22 402 against acidosis in preantral follicles by multiple mechanisms. *Development*  
23 403 2007;134(23):4283-95. doi: 10.1242/dev.005272 [published Online First: 2007/11/06]
- 24 404 9. Dale B, Menezo Y, Cohen J, et al. Intracellular pH regulation in the human oocyte. *Hum*  
25 405 *Reprod* 1998;13(4):964-70. doi: 10.1093/humrep/13.4.964 [published Online First:  
26 406 1998/06/10]
- 27 407 10. Lane M, Baltz JM, Bavister BD. Na<sup>+</sup>/H<sup>+</sup> antiporter activity in hamster embryos is  
28 408 activated during fertilization. *Dev Biol* 1999;208(1):244-52. doi:  
29 409 10.1006/dbio.1999.9198 [published Online First: 1999/03/17]
- 30 410 11. Swain JE, Pool TB. New pH-buffering system for media utilized during gamete and  
31 411 embryo manipulations for assisted reproduction. *Reprod Biomed Online*  
32 412 2009;18(6):799-810. [published Online First: 2009/06/06]
- 33 413 12. Hentemann M, Mousavi K, Bertheussen K. Differential pH in embryo culture. *Fertil*  
34 414 *Steril* 2011;95(4):1291-4. doi: 10.1016/j.fertnstert.2010.10.018 [published Online  
35 415 First: 2010/11/12]
- 36 416 13. Carney EW, Bavister BD. Regulation of hamster embryo development in vitro by carbon  
37 417 dioxide. *Biol Reprod* 1987;36(5):1155-63. doi: 10.1095/biolreprod36.5.1155  
38 418 [published Online First: 1987/06/01]
- 39 419 14. Edwards LJ, Williams DA, Gardner DK. Intracellular pH of the mouse preimplantation  
40 420 embryo: amino acids act as buffers of intracellular pH. *Hum Reprod*  
41 421 1998;13(12):3441-8. doi: 10.1093/humrep/13.12.3441 [published Online First:  
42 422 1999/01/14]
- 43 423 15. Edwards LJ, Williams DA, Gardner DK. Intracellular pH of the preimplantation mouse  
44 424 embryo: effects of extracellular pH and weak acids. *Mol Reprod Dev* 1998;50(4):434-  
45 425 42. doi: 10.1002/(SICI)1098-2795(199808)50:4<434::AID-MRD7>3.0.CO;2-J  
46 426 [published Online First: 1998/07/21]
- 47 427 16. Williams JR. The Declaration of Helsinki and public health. *Bull World Health Organ*  
48 428 2008;86(8):650-2. doi: 10.2471/blt.08.050955 [published Online First: 2008/09/18]
- 49 429 17. Schulz KF, Altman DG, Moher D, et al. CONSORT 2010 statement: updated guidelines  
50 430 for reporting parallel group randomised trials. *BMJ* 2010;340:c332. doi:  
51 431 10.1136/bmj.c332 [published Online First: 2010/03/25]
- 52  
53  
54  
55  
56  
57  
58  
59  
60

- 1  
2  
3 432 18. World Health Organization. WHO laboratory manual for the examination and processing  
4 433 of human semen. 5th ed. Geneva: World Health Organization 2010.  
5 434 19. Palermo G, Joris H, Devroey P, et al. Pregnancies after intracytoplasmic injection of  
6 435 single spermatozoon into an oocyte. *Lancet* 1992;340(8810):17-8. doi: 10.1016/0140-  
7 436 6736(92)92425-f [published Online First: 1992/07/04]  
8 437 20. Mortimer D, Cohen J, Mortimer ST, et al. Cairo consensus on the IVF laboratory  
9 438 environment and air quality: report of an expert meeting. *Reprod Biomed Online*  
10 439 2018;36(6):658-74. doi: 10.1016/j.rbmo.2018.02.005 [published Online First:  
11 440 2018/04/17]  
12 441 21. Medicine ASIR, Embryology ESIG. Istanbul consensus workshop on embryo assessment:  
13 442 proceedings of an expert meeting. *Reprod Biomed Online* 2011;22(6):632-46. doi:  
14 443 10.1016/j.rbmo.2011.02.001 [published Online First: 2011/04/13]  
15 444 22. Duffy JMN, Bhattacharya S, Curtis C, et al. A protocol developing, disseminating and  
16 445 implementing a core outcome set for infertility. *Hum Reprod Open*  
17 446 2018;2018(3):hoy007. doi: 10.1093/hropen/hoy007 [published Online First:  
18 447 2019/03/22]  
19  
20  
21  
22 448

23  
24 449 Figure Legend: Trial plan for enrolment  
25  
26  
27  
28  
29  
30  
31  
32  
33  
34  
35  
36  
37  
38  
39  
40  
41  
42  
43  
44  
45  
46  
47  
48  
49  
50  
51  
52  
53  
54  
55  
56  
57  
58  
59  
60

Couples will receive detailed information on the possible risks and potential benefits.

Couples with primary acceptance will be randomized to the three pH arms of the study

Randomization will occur to assign ~ 2100 participants to undergo day-5 fresh embryo-transfer utilizing the blastocysts developed in the either 7.2, 7.3 or 7.4 pH levels.

### Women randomization

~ 700 participants will be randomized to undergo embryo culture in 7.2 pH level for 5 to 6 days and will receive fresh embryo transfer from this arm.

~ 700 participants will be randomized to undergo embryo culture in 7.3 pH level for 5 to 6 days and will receive fresh embryo transfer from this arm.

~ 700 participants will be randomized to undergo embryo culture in 7.4 pH level for 5 to 6 days and will receive fresh embryo transfer from this arm.

The intention-to-treat will include all randomized participants to 7.2 pH level group with the live birth rate as primary endpoint.

The intention-to-treat will include all randomized participants to 7.3 pH level group with the live birth rate as primary endpoint.

The intention-to-treat will include all randomized participants to 7.4 pH level group with the live birth rate as primary endpoint.

## pH trial plan for enrollment and outcomes – 7.2, 7.3 and 7.4 pH levels

# Reporting checklist for protocol of a clinical trial.

Based on the SPIRIT guidelines.

## Instructions to authors

Complete this checklist by entering the page numbers from your manuscript where readers will find each of the items listed below.

Your article may not currently address all the items on the checklist. Please modify your text to include the missing information. If you are certain that an item does not apply, please write "n/a" and provide a short explanation.

Upload your completed checklist as an extra file when you submit to a journal.

In your methods section, say that you used the SPIRIT reporting guidelines, and cite them as:

Chan A-W, Tetzlaff JM, Altman DG, Laupacis A, Gøtzsche PC, Krleža-Jerić K, Hróbjartsson A, Mann H, Dickersin K, Berlin J, Doré C, Parulekar W, Summerskill W, Groves T, Schulz K, Sox H, Rockhold FW, Rennie D, Moher D. SPIRIT 2013 Statement: Defining standard protocol items for clinical trials. *Ann Intern Med.* 2013;158(3):200-207

|                                             |                     | Reporting Item                                                                                               | Page Number |
|---------------------------------------------|---------------------|--------------------------------------------------------------------------------------------------------------|-------------|
| <b>Administrative information</b>           |                     |                                                                                                              |             |
| Title                                       | <a href="#">#1</a>  | Descriptive title identifying the study design, population, interventions, and, if applicable, trial acronym | 1           |
| Trial registration                          | <a href="#">#2a</a> | Trial identifier and registry name. If not yet registered, name of intended registry                         | 2           |
| Trial registration: data set                | <a href="#">#2b</a> | All items from the World Health Organization Trial Registration Data Set                                     | 4           |
| Protocol version                            | <a href="#">#3</a>  | Date and version identifier                                                                                  | 4           |
| Funding                                     | <a href="#">#4</a>  | Sources and types of financial, material, and other support                                                  | 13          |
| Roles and responsibilities: contributorship | <a href="#">#5a</a> | Names, affiliations, and roles of protocol contributors                                                      | 1           |

|    |                           |                     |                                                                    |       |
|----|---------------------------|---------------------|--------------------------------------------------------------------|-------|
| 1  | Roles and                 | <a href="#">#5b</a> | Name and contact information for the trial sponsor                 | 1     |
| 2  | responsibilities:         |                     |                                                                    |       |
| 3  | sponsor contact           |                     |                                                                    |       |
| 4  | information               |                     |                                                                    |       |
| 5  |                           |                     |                                                                    |       |
| 6  |                           |                     |                                                                    |       |
| 7  |                           |                     |                                                                    |       |
| 8  | Roles and                 | <a href="#">#5c</a> | Role of study sponsor and funders, if any, in study design;        | 13    |
| 9  | responsibilities:         |                     | collection, management, analysis, and interpretation of data;      |       |
| 10 | sponsor and funder        |                     | writing of the report; and the decision to submit the report for   |       |
| 11 |                           |                     | publication, including whether they will have ultimate authority   |       |
| 12 |                           |                     | over any of these activities                                       |       |
| 13 |                           |                     |                                                                    |       |
| 14 |                           |                     |                                                                    |       |
| 15 |                           |                     |                                                                    |       |
| 16 | Roles and                 | <a href="#">#5d</a> | Composition, roles, and responsibilities of the coordinating       | 4     |
| 17 | responsibilities:         |                     | centre, steering committee, endpoint adjudication committee,       |       |
| 18 | committees                |                     | data management team, and other individuals or groups              |       |
| 19 |                           |                     | overseeing the trial, if applicable (see Item 21a for data         |       |
| 20 |                           |                     | monitoring committee)                                              |       |
| 21 |                           |                     |                                                                    |       |
| 22 |                           |                     |                                                                    |       |
| 23 |                           |                     |                                                                    |       |
| 24 | <b>Introduction</b>       |                     |                                                                    |       |
| 25 |                           |                     |                                                                    |       |
| 26 |                           |                     |                                                                    |       |
| 27 | Background and            | <a href="#">#6a</a> | Description of research question and justification for undertaking | 2 & 3 |
| 28 | rationale                 |                     | the trial, including summary of relevant studies (published and    |       |
| 29 |                           |                     | unpublished) examining benefits and harms for each intervention    |       |
| 30 |                           |                     |                                                                    |       |
| 31 |                           |                     |                                                                    |       |
| 32 | Background and            | <a href="#">#6b</a> | Explanation for choice of comparators                              | 2 & 3 |
| 33 | rationale: choice of      |                     |                                                                    |       |
| 34 | comparators               |                     |                                                                    |       |
| 35 |                           |                     |                                                                    |       |
| 36 |                           |                     |                                                                    |       |
| 37 | Objectives                | <a href="#">#7</a>  | Specific objectives or hypotheses                                  | 3 & 4 |
| 38 |                           |                     |                                                                    |       |
| 39 |                           |                     |                                                                    |       |
| 40 | Trial design              | <a href="#">#8</a>  | Description of trial design including type of trial (eg, parallel  | 4     |
| 41 |                           |                     | group, crossover, factorial, single group), allocation ratio, and  |       |
| 42 |                           |                     | framework (eg, superiority, equivalence, non-inferiority,          |       |
| 43 |                           |                     | exploratory)                                                       |       |
| 44 |                           |                     |                                                                    |       |
| 45 |                           |                     |                                                                    |       |
| 46 | <b>Methods:</b>           |                     |                                                                    |       |
| 47 | <b>Participants,</b>      |                     |                                                                    |       |
| 48 | <b>interventions, and</b> |                     |                                                                    |       |
| 49 | <b>outcomes</b>           |                     |                                                                    |       |
| 50 |                           |                     |                                                                    |       |
| 51 |                           |                     |                                                                    |       |
| 52 |                           |                     |                                                                    |       |
| 53 | Study setting             | <a href="#">#9</a>  | Description of study settings (eg, community clinic, academic      | 4     |
| 54 |                           |                     | hospital) and list of countries where data will be collected.      |       |
| 55 |                           |                     | Reference to where list of study sites can be obtained             |       |
| 56 |                           |                     |                                                                    |       |
| 57 |                           |                     |                                                                    |       |
| 58 |                           |                     |                                                                    |       |
| 59 |                           |                     |                                                                    |       |
| 60 |                           |                     |                                                                    |       |

|    |                              |                      |                                                                                                                                                                                                                                                                                                                                                                                |         |
|----|------------------------------|----------------------|--------------------------------------------------------------------------------------------------------------------------------------------------------------------------------------------------------------------------------------------------------------------------------------------------------------------------------------------------------------------------------|---------|
| 1  | Eligibility criteria         | <a href="#">#10</a>  | Inclusion and exclusion criteria for participants. If applicable, eligibility criteria for study centres and individuals who will perform the interventions (eg, surgeons, psychotherapists)                                                                                                                                                                                   | 5 & 6   |
| 2  |                              |                      |                                                                                                                                                                                                                                                                                                                                                                                |         |
| 3  |                              |                      |                                                                                                                                                                                                                                                                                                                                                                                |         |
| 4  |                              |                      |                                                                                                                                                                                                                                                                                                                                                                                |         |
| 5  |                              |                      |                                                                                                                                                                                                                                                                                                                                                                                |         |
| 6  | Interventions:               | <a href="#">#11a</a> | Interventions for each group with sufficient detail to allow replication, including how and when they will be administered                                                                                                                                                                                                                                                     | 4 & 5   |
| 7  | description                  |                      |                                                                                                                                                                                                                                                                                                                                                                                |         |
| 8  |                              |                      |                                                                                                                                                                                                                                                                                                                                                                                |         |
| 9  |                              |                      |                                                                                                                                                                                                                                                                                                                                                                                |         |
| 10 | Interventions:               | <a href="#">#11b</a> | Criteria for discontinuing or modifying allocated interventions for a given trial participant (eg, drug dose change in response to harms, participant request, or improving / worsening disease)                                                                                                                                                                               | 4 & 5   |
| 11 | modifications                |                      |                                                                                                                                                                                                                                                                                                                                                                                |         |
| 12 |                              |                      |                                                                                                                                                                                                                                                                                                                                                                                |         |
| 13 |                              |                      |                                                                                                                                                                                                                                                                                                                                                                                |         |
| 14 |                              |                      |                                                                                                                                                                                                                                                                                                                                                                                |         |
| 15 | Interventions:               | <a href="#">#11c</a> | Strategies to improve adherence to intervention protocols, and any procedures for monitoring adherence (eg, drug tablet return; laboratory tests)                                                                                                                                                                                                                              | 4 & 5   |
| 16 | adherence                    |                      |                                                                                                                                                                                                                                                                                                                                                                                |         |
| 17 |                              |                      |                                                                                                                                                                                                                                                                                                                                                                                |         |
| 18 |                              |                      |                                                                                                                                                                                                                                                                                                                                                                                |         |
| 19 |                              |                      |                                                                                                                                                                                                                                                                                                                                                                                |         |
| 20 |                              |                      |                                                                                                                                                                                                                                                                                                                                                                                |         |
| 21 | Interventions:               | <a href="#">#11d</a> | Relevant concomitant care and interventions that are permitted or prohibited during the trial                                                                                                                                                                                                                                                                                  | 9       |
| 22 | concomitant care             |                      |                                                                                                                                                                                                                                                                                                                                                                                |         |
| 23 |                              |                      |                                                                                                                                                                                                                                                                                                                                                                                |         |
| 24 |                              |                      |                                                                                                                                                                                                                                                                                                                                                                                |         |
| 25 | Outcomes                     | <a href="#">#12</a>  | Primary, secondary, and other outcomes, including the specific measurement variable (eg, systolic blood pressure), analysis metric (eg, change from baseline, final value, time to event), method of aggregation (eg, median, proportion), and time point for each outcome. Explanation of the clinical relevance of chosen efficacy and harm outcomes is strongly recommended | 10 & 11 |
| 26 |                              |                      |                                                                                                                                                                                                                                                                                                                                                                                |         |
| 27 |                              |                      |                                                                                                                                                                                                                                                                                                                                                                                |         |
| 28 |                              |                      |                                                                                                                                                                                                                                                                                                                                                                                |         |
| 29 |                              |                      |                                                                                                                                                                                                                                                                                                                                                                                |         |
| 30 |                              |                      |                                                                                                                                                                                                                                                                                                                                                                                |         |
| 31 |                              |                      |                                                                                                                                                                                                                                                                                                                                                                                |         |
| 32 |                              |                      |                                                                                                                                                                                                                                                                                                                                                                                |         |
| 33 |                              |                      |                                                                                                                                                                                                                                                                                                                                                                                |         |
| 34 | Participant timeline         | <a href="#">#13</a>  | Time schedule of enrolment, interventions (including any run-ins and washouts), assessments, and visits for participants. A schematic diagram is highly recommended (see Figure)                                                                                                                                                                                               | 8       |
| 35 |                              |                      |                                                                                                                                                                                                                                                                                                                                                                                |         |
| 36 |                              |                      |                                                                                                                                                                                                                                                                                                                                                                                |         |
| 37 |                              |                      |                                                                                                                                                                                                                                                                                                                                                                                |         |
| 38 |                              |                      |                                                                                                                                                                                                                                                                                                                                                                                |         |
| 39 |                              |                      |                                                                                                                                                                                                                                                                                                                                                                                |         |
| 40 | Sample size                  | <a href="#">#14</a>  | Estimated number of participants needed to achieve study objectives and how it was determined, including clinical and statistical assumptions supporting any sample size calculations                                                                                                                                                                                          | 11 & 12 |
| 41 |                              |                      |                                                                                                                                                                                                                                                                                                                                                                                |         |
| 42 |                              |                      |                                                                                                                                                                                                                                                                                                                                                                                |         |
| 43 |                              |                      |                                                                                                                                                                                                                                                                                                                                                                                |         |
| 44 |                              |                      |                                                                                                                                                                                                                                                                                                                                                                                |         |
| 45 | Recruitment                  | <a href="#">#15</a>  | Strategies for achieving adequate participant enrolment to reach target sample size                                                                                                                                                                                                                                                                                            | 4       |
| 46 |                              |                      |                                                                                                                                                                                                                                                                                                                                                                                |         |
| 47 |                              |                      |                                                                                                                                                                                                                                                                                                                                                                                |         |
| 48 |                              |                      |                                                                                                                                                                                                                                                                                                                                                                                |         |
| 49 | <b>Methods: Assignment</b>   |                      |                                                                                                                                                                                                                                                                                                                                                                                |         |
| 50 | <b>of interventions (for</b> |                      |                                                                                                                                                                                                                                                                                                                                                                                |         |
| 51 | <b>controlled trials)</b>    |                      |                                                                                                                                                                                                                                                                                                                                                                                |         |
| 52 |                              |                      |                                                                                                                                                                                                                                                                                                                                                                                |         |
| 53 |                              |                      |                                                                                                                                                                                                                                                                                                                                                                                |         |
| 54 | Allocation: sequence         | <a href="#">#16a</a> | Method of generating the allocation sequence (eg, computer-generated random numbers), and list of any factors for stratification. To reduce predictability of a random sequence, details of any planned restriction (eg, blocking) should be                                                                                                                                   | 5       |
| 55 | generation                   |                      |                                                                                                                                                                                                                                                                                                                                                                                |         |
| 56 |                              |                      |                                                                                                                                                                                                                                                                                                                                                                                |         |
| 57 |                              |                      |                                                                                                                                                                                                                                                                                                                                                                                |         |
| 58 |                              |                      |                                                                                                                                                                                                                                                                                                                                                                                |         |
| 59 |                              |                      |                                                                                                                                                                                                                                                                                                                                                                                |         |
| 60 |                              |                      |                                                                                                                                                                                                                                                                                                                                                                                |         |



provided in a separate document that is unavailable to those who enrol participants or assign interventions

|    |                        |                      |                                                                     |         |
|----|------------------------|----------------------|---------------------------------------------------------------------|---------|
| 1  |                        |                      |                                                                     |         |
| 2  |                        |                      |                                                                     |         |
| 3  |                        |                      |                                                                     |         |
| 4  | Allocation             | <a href="#">#16b</a> | Mechanism of implementing the allocation sequence (eg, central      | 5       |
| 5  | concealment            |                      | telephone; sequentially numbered, opaque, sealed envelopes),        |         |
| 6  |                        |                      | describing any steps to conceal the sequence until interventions    |         |
| 7  | mechanism              |                      | are assigned                                                        |         |
| 8  |                        |                      |                                                                     |         |
| 9  |                        |                      |                                                                     |         |
| 10 |                        |                      |                                                                     |         |
| 11 | Allocation:            | <a href="#">#16c</a> | Who will generate the allocation sequence, who will enrol           | 5       |
| 12 | implementation         |                      | participants, and who will assign participants to interventions     |         |
| 13 |                        |                      |                                                                     |         |
| 14 | Blinding (masking)     | <a href="#">#17a</a> | Who will be blinded after assignment to interventions (eg, trial    | 5       |
| 15 |                        |                      | participants, care providers, outcome assessors, data analysts),    |         |
| 16 |                        |                      | and how                                                             |         |
| 17 |                        |                      |                                                                     |         |
| 18 |                        |                      |                                                                     |         |
| 19 |                        |                      |                                                                     |         |
| 20 | Blinding (masking):    | <a href="#">#17b</a> | If blinded, circumstances under which unblinding is permissible,    | 5       |
| 21 | emergency unblinding   |                      | and procedure for revealing a participant's allocated intervention  |         |
| 22 |                        |                      | during the trial                                                    |         |
| 23 |                        |                      |                                                                     |         |
| 24 |                        |                      |                                                                     |         |
| 25 | <b>Methods: Data</b>   |                      |                                                                     |         |
| 26 | <b>collection,</b>     |                      |                                                                     |         |
| 27 | <b>management, and</b> |                      |                                                                     |         |
| 28 | <b>analysis</b>        |                      |                                                                     |         |
| 29 |                        |                      |                                                                     |         |
| 30 |                        |                      |                                                                     |         |
| 31 |                        |                      |                                                                     |         |
| 32 | Data collection plan   | <a href="#">#18a</a> | Plans for assessment and collection of outcome, baseline, and       | 11      |
| 33 |                        |                      | other trial data, including any related processes to promote data   |         |
| 34 |                        |                      | quality (eg, duplicate measurements, training of assessors) and a   |         |
| 35 |                        |                      | description of study instruments (eg, questionnaires, laboratory    |         |
| 36 |                        |                      | tests) along with their reliability and validity, if known.         |         |
| 37 |                        |                      | Reference to where data collection forms can be found, if not in    |         |
| 38 |                        |                      | the protocol                                                        |         |
| 39 |                        |                      |                                                                     |         |
| 40 |                        |                      |                                                                     |         |
| 41 |                        |                      |                                                                     |         |
| 42 |                        |                      |                                                                     |         |
| 43 | Data collection plan:  | <a href="#">#18b</a> | Plans to promote participant retention and complete follow-up,      | 11      |
| 44 | retention              |                      | including list of any outcome data to be collected for participants |         |
| 45 |                        |                      | who discontinue or deviate from intervention protocols              |         |
| 46 |                        |                      |                                                                     |         |
| 47 |                        |                      |                                                                     |         |
| 48 | Data management        | <a href="#">#19</a>  | Plans for data entry, coding, security, and storage, including any  | 11      |
| 49 |                        |                      | related processes to promote data quality (eg, double data entry;   |         |
| 50 |                        |                      | range checks for data values). Reference to where details of data   |         |
| 51 |                        |                      | management procedures can be found, if not in the protocol          |         |
| 52 |                        |                      |                                                                     |         |
| 53 |                        |                      |                                                                     |         |
| 54 |                        |                      |                                                                     |         |
| 55 | Statistics: outcomes   | <a href="#">#20a</a> | Statistical methods for analysing primary and secondary             | 11 & 12 |
| 56 |                        |                      | outcomes. Reference to where other details of the statistical       |         |
| 57 |                        |                      | analysis plan can be found, if not in the protocol                  |         |
| 58 |                        |                      |                                                                     |         |
| 59 |                        |                      |                                                                     |         |
| 60 |                        |                      |                                                                     |         |



|    |                            |                      |                                                                    |         |
|----|----------------------------|----------------------|--------------------------------------------------------------------|---------|
| 1  | Statistics: additional     | <a href="#">#20b</a> | Methods for any additional analyses (eg, subgroup and adjusted     | 11 & 12 |
| 2  | analyses                   |                      | analyses)                                                          |         |
| 3  |                            |                      |                                                                    |         |
| 4  | Statistics: analysis       | <a href="#">#20c</a> | Definition of analysis population relating to protocol non-        | 11 & 12 |
| 5  | population and missing     |                      | adherence (eg, as randomised analysis), and any statistical        |         |
| 6  | data                       |                      | methods to handle missing data (eg, multiple imputation)           |         |
| 7  |                            |                      |                                                                    |         |
| 8  |                            |                      |                                                                    |         |
| 9  |                            |                      |                                                                    |         |
| 10 | <b>Methods: Monitoring</b> |                      |                                                                    |         |
| 11 |                            |                      |                                                                    |         |
| 12 | Data monitoring:           | <a href="#">#21a</a> | Composition of data monitoring committee (DMC); summary of         | 4       |
| 13 | formal committee           |                      | its role and reporting structure; statement of whether it is       |         |
| 14 |                            |                      | independent from the sponsor and competing interests; and          |         |
| 15 |                            |                      | reference to where further details about its charter can be found, |         |
| 16 |                            |                      | if not in the protocol. Alternatively, an explanation of why a     |         |
| 17 |                            |                      | DMC is not needed                                                  |         |
| 18 |                            |                      |                                                                    |         |
| 19 |                            |                      |                                                                    |         |
| 20 |                            |                      |                                                                    |         |
| 21 |                            |                      |                                                                    |         |
| 22 | Data monitoring:           | <a href="#">#21b</a> | Description of any interim analyses and stopping guidelines,       | 4, 11 & |
| 23 | interim analysis           |                      | including who will have access to these interim results and make   | 12      |
| 24 |                            |                      | the final decision to terminate the trial                          |         |
| 25 |                            |                      |                                                                    |         |
| 26 |                            |                      |                                                                    |         |
| 27 | Harms                      | <a href="#">#22</a>  | Plans for collecting, assessing, reporting, and managing solicited | 4       |
| 28 |                            |                      | and spontaneously reported adverse events and other unintended     |         |
| 29 |                            |                      | effects of trial interventions or trial conduct                    |         |
| 30 |                            |                      |                                                                    |         |
| 31 |                            |                      |                                                                    |         |
| 32 |                            |                      |                                                                    |         |
| 33 | Auditing                   | <a href="#">#23</a>  | Frequency and procedures for auditing trial conduct, if any, and   | 4       |
| 34 |                            |                      | whether the process will be independent from investigators and     |         |
| 35 |                            |                      | the sponsor                                                        |         |
| 36 |                            |                      |                                                                    |         |
| 37 |                            |                      |                                                                    |         |
| 38 | <b>Ethics and</b>          |                      |                                                                    |         |
| 39 | <b>dissemination</b>       |                      |                                                                    |         |
| 40 |                            |                      |                                                                    |         |
| 41 |                            |                      |                                                                    |         |
| 42 | Research ethics            | <a href="#">#24</a>  | Plans for seeking research ethics committee / institutional review | 4       |
| 43 | approval                   |                      | board (REC / IRB) approval                                         |         |
| 44 |                            |                      |                                                                    |         |
| 45 |                            |                      |                                                                    |         |
| 46 | Protocol amendments        | <a href="#">#25</a>  | Plans for communicating important protocol modifications (eg,      | 4       |
| 47 |                            |                      | changes to eligibility criteria, outcomes, analyses) to relevant   |         |
| 48 |                            |                      | parties (eg, investigators, REC / IRBs, trial participants, trial  |         |
| 49 |                            |                      | registries, journals, regulators)                                  |         |
| 50 |                            |                      |                                                                    |         |
| 51 |                            |                      |                                                                    |         |
| 52 |                            |                      |                                                                    |         |
| 53 | Consent or assent          | <a href="#">#26a</a> | Who will obtain informed consent or assent from potential trial    | 4       |
| 54 |                            |                      | participants or authorised surrogates, and how (see Item 32)       |         |
| 55 |                            |                      |                                                                    |         |
| 56 |                            |                      |                                                                    |         |
| 57 |                            |                      |                                                                    |         |
| 58 |                            |                      |                                                                    |         |
| 59 |                            |                      |                                                                    |         |
| 60 |                            |                      |                                                                    |         |

|    |                          |                      |                                                                      |     |
|----|--------------------------|----------------------|----------------------------------------------------------------------|-----|
| 1  | Consent or assent:       | <a href="#">#26b</a> | Additional consent provisions for collection and use of              | 4   |
| 2  | ancillary studies        |                      | participant data and biological specimens in ancillary studies, if   |     |
| 3  |                          |                      | applicable                                                           |     |
| 4  |                          |                      |                                                                      |     |
| 5  |                          |                      |                                                                      |     |
| 6  | Confidentiality          | <a href="#">#27</a>  | How personal information about potential and enrolled                | 4   |
| 7  |                          |                      | participants will be collected, shared, and maintained in order to   |     |
| 8  |                          |                      | protect confidentiality before, during, and after the trial          |     |
| 9  |                          |                      |                                                                      |     |
| 10 |                          |                      |                                                                      |     |
| 11 | Declaration of interests | <a href="#">#28</a>  | Financial and other competing interests for principal investigators  | 13  |
| 12 |                          |                      | for the overall trial and each study site                            |     |
| 13 |                          |                      |                                                                      |     |
| 14 |                          |                      |                                                                      |     |
| 15 | Data access              | <a href="#">#29</a>  | Statement of who will have access to the final trial dataset, and    | 4   |
| 16 |                          |                      | disclosure of contractual agreements that limit such access for      |     |
| 17 |                          |                      | investigators                                                        |     |
| 18 |                          |                      |                                                                      |     |
| 19 |                          |                      |                                                                      |     |
| 20 | Ancillary and post trial | <a href="#">#30</a>  | Provisions, if any, for ancillary and post-trial care, and for       | 4   |
| 21 | care                     |                      | compensation to those who suffer harm from trial participation       |     |
| 22 |                          |                      |                                                                      |     |
| 23 |                          |                      |                                                                      |     |
| 24 | Dissemination policy:    | <a href="#">#31a</a> | Plans for investigators and sponsor to communicate trial results     | 4   |
| 25 | trial results            |                      | to participants, healthcare professionals, the public, and other     |     |
| 26 |                          |                      | relevant groups (eg, via publication, reporting in results           |     |
| 27 |                          |                      | databases, or other data sharing arrangements), including any        |     |
| 28 |                          |                      | publication restrictions                                             |     |
| 29 |                          |                      |                                                                      |     |
| 30 |                          |                      |                                                                      |     |
| 31 |                          |                      |                                                                      |     |
| 32 |                          |                      |                                                                      |     |
| 33 | Dissemination policy:    | <a href="#">#31b</a> | Authorship eligibility guidelines and any intended use of            | 1   |
| 34 | authorship               |                      | professional writers                                                 |     |
| 35 |                          |                      |                                                                      |     |
| 36 |                          |                      |                                                                      |     |
| 37 | Dissemination policy:    | <a href="#">#31c</a> | Plans, if any, for granting public access to the full protocol,      | n/a |
| 38 | reproducible research    |                      | participant-level dataset, and statistical code                      |     |
| 39 |                          |                      |                                                                      |     |
| 40 |                          |                      |                                                                      |     |
| 41 | <b>Appendices</b>        |                      |                                                                      |     |
| 42 |                          |                      |                                                                      |     |
| 43 | Informed consent         | <a href="#">#32</a>  | Model consent form and other related documentation given to          | 4   |
| 44 | materials                |                      | participants and authorised surrogates                               |     |
| 45 |                          |                      |                                                                      |     |
| 46 |                          |                      |                                                                      |     |
| 47 | Biological specimens     | <a href="#">#33</a>  | Plans for collection, laboratory evaluation, and storage of          | n/a |
| 48 |                          |                      | biological specimens for genetic or molecular analysis in the        |     |
| 49 |                          |                      | current trial and for future use in ancillary studies, if applicable |     |
| 50 |                          |                      |                                                                      |     |
| 51 |                          |                      |                                                                      |     |

The SPIRIT checklist is distributed under the terms of the Creative Commons Attribution License CC-BY-ND 3.0. This checklist was completed on 09. September 2019 using <https://www.goodreports.org/>, a tool made by the [EQUATOR Network](#) in collaboration with [Penelope.ai](#)

# BMJ Open

## Triple-arm Trial of pH (Tri-pH) Effect on Live birth After ICSI: Protocol of a randomised controlled trial

|                                 |                                                                                                                                                                                                                                                                                                                                                                                                                                                                                                                                                                                                                                                                                                                                                   |
|---------------------------------|---------------------------------------------------------------------------------------------------------------------------------------------------------------------------------------------------------------------------------------------------------------------------------------------------------------------------------------------------------------------------------------------------------------------------------------------------------------------------------------------------------------------------------------------------------------------------------------------------------------------------------------------------------------------------------------------------------------------------------------------------|
| Journal:                        | <i>BMJ Open</i>                                                                                                                                                                                                                                                                                                                                                                                                                                                                                                                                                                                                                                                                                                                                   |
| Manuscript ID                   | bmjopen-2019-034194.R2                                                                                                                                                                                                                                                                                                                                                                                                                                                                                                                                                                                                                                                                                                                            |
| Article Type:                   | Protocol                                                                                                                                                                                                                                                                                                                                                                                                                                                                                                                                                                                                                                                                                                                                          |
| Date Submitted by the Author:   | 05-Dec-2019                                                                                                                                                                                                                                                                                                                                                                                                                                                                                                                                                                                                                                                                                                                                       |
| Complete List of Authors:       | Fawzy, Mohamed; IbnSina Hospital, Ibsina IVF Centre; Banon IVF Centre<br>Emad, Mai; IbnSina Hospital, Ibsina IVF Centre; Banon IVF Centre<br>Wilkinson, Jack; University of Manchester, Centre for Biostatistics; Salford Royal NHS Foundation Trust, Research and Development<br>Mansour, Ragaa; Egyptian IVF-ET Center<br>Mahran, Ali; Assiut University Faculty of Medicine, Department of Dermatology, Venereology and Andrology<br>Fetih, Ahmed; Assiut University Faculty of Medicine, Department of Obstetrics and Gynecology<br>Abdelrahman , Mohamed; Sohag University Faculty of Medicine, Department of Obstetrics and Gynecology<br>AbdelGhafar, Hazem; Sohag University Faculty of Medicine, Department of Obstetrics and Gynecology |
| <b>Primary Subject Heading</b>: | Obstetrics and gynaecology                                                                                                                                                                                                                                                                                                                                                                                                                                                                                                                                                                                                                                                                                                                        |
| Secondary Subject Heading:      | Reproductive medicine, Obstetrics and gynaecology                                                                                                                                                                                                                                                                                                                                                                                                                                                                                                                                                                                                                                                                                                 |
| Keywords:                       | Embryo culture, pH level, culture media, blastocyst formation                                                                                                                                                                                                                                                                                                                                                                                                                                                                                                                                                                                                                                                                                     |
|                                 |                                                                                                                                                                                                                                                                                                                                                                                                                                                                                                                                                                                                                                                                                                                                                   |

SCHOLARONE™  
Manuscripts



I, the Submitting Author has the right to grant and does grant on behalf of all authors of the Work (as defined in the below author licence), an exclusive licence and/or a non-exclusive licence for contributions from authors who are: i) UK Crown employees; ii) where BMJ has agreed a CC-BY licence shall apply, and/or iii) in accordance with the terms applicable for US Federal Government officers or employees acting as part of their official duties; on a worldwide, perpetual, irrevocable, royalty-free basis to BMJ Publishing Group Ltd ("BMJ") its licensees and where the relevant Journal is co-owned by BMJ to the co-owners of the Journal, to publish the Work in this journal and any other BMJ products and to exploit all rights, as set out in our [licence](#).

The Submitting Author accepts and understands that any supply made under these terms is made by BMJ to the Submitting Author unless you are acting as an employee on behalf of your employer or a postgraduate student of an affiliated institution which is paying any applicable article publishing charge ("APC") for Open Access articles. Where the Submitting Author wishes to make the Work available on an Open Access basis (and intends to pay the relevant APC), the terms of reuse of such Open Access shall be governed by a Creative Commons licence – details of these licences and which [Creative Commons](#) licence will apply to this Work are set out in our licence referred to above.

Other than as permitted in any relevant BMJ Author's Self Archiving Policies, I confirm this Work has not been accepted for publication elsewhere, is not being considered for publication elsewhere and does not duplicate material already published. I confirm all authors consent to publication of this Work and authorise the granting of this licence.

## pH-Study Protocol

### **Title: Triple-arm Trial of pH (Tri-pH) Effect on Live birth After ICSI: Protocol of A Randomised Controlled Trial**

Mohamed Fawzy,<sup>ab</sup> Mai Emad,<sup>ab</sup> Jack Wilkinson,<sup>c</sup> Ragaa Mansour,<sup>d</sup> Ali Mahran,<sup>d</sup> Ahmed  
N. Fetih,<sup>f</sup> Mohamed Y. AbdelRahman,<sup>g</sup> Hazem Abdelghafar,<sup>g</sup>

*IbnSina IVF Centre, Sohag and Banon IVF Centre, Assuit, Egypt*

<sup>a</sup>IbnSina IVF Centre, IbnSina Hospital, Sohag, Egypt; <sup>b</sup>Banon IVF Centre, Assiut, Egypt;  
<sup>c</sup>Centre for Biostatistics, University of Manchester, UK; <sup>d</sup>Egyptian IVF-ET Centre, Cairo,  
Egypt; <sup>e</sup>Department of Dermatology, Venereology and Andrology, Faculty of Medicine,  
Assiut University, Egypt; <sup>f</sup>Department of Obstetrics and Gynecology, Faculty of Medicine,  
Assiut University, Egypt; <sup>g</sup>Department of Obstetrics and Gynecology, Faculty of Medicine,  
Sohag University, Egypt

Corresponding Author: Dr. Mohamed Fawzy, IVF Laboratory Director (IbnSina and Banon  
IVF Centres), IbnSina Hospital, 146 El Aref Square, Sohag, Egypt; Cell: +201011122286; E-  
mail: [drfawzy001@me.com](mailto:drfawzy001@me.com)

## Abstract

### Introduction

The pH of culture media for human in vitro fertilization (IVF) is a potential stressor that can affect pre- and post-implantation embryonic growth. There has been no clear evidence about the level that can support in vitro human embryo development optimally. Most manufactures of culture media have specified a range of 7.2 to 7.4, and routine practice is to use a level of 7.25 to 7.3 pH. However, these recommendations resulted from designers' opinions or experiments on mice models. There has been no randomised trial to search for the effect of pH level on live birth rate after IVF. The aim of this trial is to examine if there is an effect on live birth rate using three different levels of pH.

### Methods and analysis

This multicentre randomised trial will involve centres specialised in IVF in Egypt. Eligible women amenable for intracytoplasmic sperm injection (ICSI) will be randomized to undergo in vitro culture in either 7.2, 7.3 or 7.4 pH level. The study is designed to detect 10% difference in live birth rate with 93% per cent power at 1% significance level.

### Ethics and dissemination

Ethics review boards of the participating centres approved the study and eligible women will sign written informed consent before enrolment. The study has established an independent data monitoring and safety committee from international experts in the field and in trial design.

**Trial registration number** NCT02896777.

### Keywords

Embryo culture, pH level, culture media, blastocyst formation

1  
2  
3  
4 55  
5 56  
6 57

### Strengths and limitations of this study

- 8 58
- The study is randomised controlled which reduces the possibility of bias.
- 10 59
- The study has an independent data monitoring committee with access to the data with
- 12 60
- no involvement in the study conduct.
- 14 61
- Two possible limitations of the study are that it will be conducted on ICSI cycles as
- 16 62
- ICSI is the preferred insemination method in the participating centres, and formed
- 18 63
- blastocyst calculation will be based on assumption for any cleavage-stage transfer.
- 20 64
- The embryologists will be aware of the culture arms during the study conduct.

### Background

25 65

26 66

27 67 Assisted reproductive techniques (ART) result in around 65% cumulative live birth within six

28 68

29 69 cycles of *in vitro* fertilisation (IVF),<sup>1</sup> which is relatively suboptimal. In addition, IVF results

30 70

31 71 in adverse perinatal outcomes, such as preterm birth and low birth weight babies compared

32 72

33 73 with the *in vivo* conception.<sup>2</sup> These outcomes can rely on factors relating to patients,

34 74

35 75 stimulation, and *in vitro* culture elements. In relation to embryo culture conditions, over 200

36 76

37 77 variables have been identified as being potentially relevant to the cycle outcome.<sup>3</sup> One

38 78

39 79 element that may influence embryo development *in vitro* is the pH level of a culture medium,

40 80

41 81 which thus far has been determined by manufacturers of culture media without recourse to a

42 82

43 83 well-powered randomized clinical trial (RCT).<sup>4</sup> The pH levels are potential stressors that vary

44 84

45 85 between media brands and from batch-to-batch depending on the bicarbonate level in culture

46 86

47 87 media and on the CO<sub>2</sub> level of incubators.<sup>5</sup> This would suggest that pH level can vary

48 88

49 89 between incubators within the same laboratory if it is not well adjusted. Recommendations

50 90

51 91 for measuring pH for embryo culture are variable between daily to monthly measurement.<sup>4</sup>

52 92

53 93 Oocytes and embryos have intracellular (pHi), which is modulated by the extracellular pH

54 94

55 95 (pHe).<sup>6</sup> The *in vitro* conditions including concentrations of bicarbonates, proteins, amino

56 96

57 97

58 98

59 99

60 100

1  
2  
3 82 acids in culture media and the CO<sub>2</sub> of incubators affect the pHe, which is a potential stressor.<sup>7</sup>  
4  
5 83 The mechanism of pHi in oocyte and embryo is complex, regulating enzymatic activity, cell  
6  
7 84 division and differentiation, protein synthesis, metabolism, mitochondrial function,  
8  
9  
10 85 cytoskeletal regulation, and microtubule dynamics.<sup>7,8</sup> Drifts in pHe translate into changes in  
11  
12 86 pHi, which can adversely affect cell function if the compensatory mechanisms failed to adapt  
13  
14 87 to restore pHi to a safe level.<sup>8</sup> The pHi can compensate through an active exchange among  
15  
16 88 Na<sup>+</sup>, HCO<sub>3</sub><sup>-</sup>/Cl<sup>-</sup> and Na<sup>+</sup>/H<sup>+</sup> to maintain it between 7 to 7.3.<sup>5,8</sup> Denuded oocyte for ICSI  
17  
18 89 through fertilization thereafter and vitrified-warmed embryos lack robust compensatory  
19  
20 90 mechanisms of pHi; therefore, drastic differences between pHe and pHi in these scenarios  
21  
22 91 can significantly perturbate embryo development.<sup>9-11</sup>  
23  
24  
25 92 That being said, an optimum level of pH for human embryo culture *in vitro* is still unknown.<sup>4</sup>  
26  
27 93 <sup>9,12-15</sup> Most recommendations rely on mice models or manufacturers of culture media.  
28  
29  
30 94 Theoretically, a wide range of pHe levels (7.0–7.5) can support human embryo development  
31  
32 95 *in vitro*. However, a narrower range of pHe levels (7.2 to 7.4) is used in clinical practice. This  
33  
34 96 is because an extreme acidic pHe level ( $\leq 7$ ) can adversely affect oocyte spindle leading to no  
35  
36 97 further post-fertilization events.<sup>4</sup> This level of acidic pH can delay or block embryo  
37  
38 98 development *in vitro*.<sup>4</sup> Similar harms can theoretically occur for oocyte and embryo, if  
39  
40 99 alkaline levels of pHe ( $\geq 7.5$ ) are used.<sup>4</sup> Although these potential harms of extreme pHe  
41  
42  
43  
44 100 levels rely on animal models, underpowered studies, or anecdotal beliefs, we have decided to  
45  
46 101 investigate a safe range of pHe (7.2 to 7.4). Why this range has been chosen depends on the  
47  
48 102 recommendations of media manufactures and the clinical practice within the majority of  
49  
50 103 human embryo culture laboratories. Although this range of 7.2 to 7.4 is used, there is clear  
51  
52 104 evidence about which level of 7.2, 7.3, or 7.4 can support human embryos to result in live  
53  
54 105 birth after transfer. This multicentre, randomized, clinical trial aims to identify whether pHe  
55  
56  
57  
58  
59  
60



1  
2  
3 106 levels of 7.2, 7.3, or 7.4 can perform better on live birth rate after ICSI in order to investigate  
4  
5 107 the potential for optimisation.  
6  
7

## 8 108 **Methods and Design**

9  
10 109 This protocol version one of a multicentre, randomized, triple-arm, triple-blind clinical trial  
11  
12 110 (NCT02896777, registered at [www.ClinicalTrials.gov](http://www.ClinicalTrials.gov)) will compare three levels of pH for  
13  
14 111 human embryo culture in vitro on live birth after ICSI (Figure 1). This partially blind design  
15  
16 112 represents that clinicians, participants and outcome assessor, not including the embryologists,  
17  
18 113 will be unaware of the study arms. This multicentre trial will involve private IVF facilities in  
19  
20 114 Egypt (Ibnsina IVF Centre, Egyptian IVF-ET centre, Banon IVF Centre, Qena IVF Centre  
21  
22 115 and Amshaj IVF Centre) with the study protocol in their hand before enrolment of  
23  
24 116 participants. If other IVF facilities join this trial before recruitment, this will be reported in  
25  
26 117 the study.  
27  
28  
29

## 30 118 **Ethics and dissemination**

31  
32  
33 119 This trial obtained the approval from Ethics Review Board of Upper Egypt IVF Network  
34  
35 120 relating to the participating sites (Approval No. 009/2016). An independent safety and  
36  
37 121 monitoring committee formed of five experts in reproductive endocrinology, reproductive  
38  
39 122 biology, embryo culture, biostatistics and trial methodology will oversee this trial. All  
40  
41 123 participants will receive independent counselling from research instructors who are not  
42  
43 124 involved in patient care or laboratory work. Participants who will accept to participate will  
44  
45 125 sign a written informed consent before enrolment. Conducting this study will be in  
46  
47 126 accordance with the Declaration of Helsinki.<sup>16</sup> The trial reporting will be according to the  
48  
49 127 CONSORT statement,<sup>17</sup> unless other guideline will have higher ranking at that time. No plan  
50  
51 128 exists to amend this protocol and any amendments will be responsibility for the safety  
52  
53 129 committee and will undergo detailed reporting on the trial registry and in the final  
54  
55  
56 130 manuscript.  
57  
58  
59  
60

**131 Intervention**

132 Oocytes and embryos in the three arms will undergo continuous culture from day 0 through  
133 day 5 or 6 without medium renewal. “Arm I” is to culture oocytes and resulting embryos after  
134 ICSI in pHe of  $7.2 \pm 0.02$ . Arm II The “Arm II” is to culture oocytes and resulting embryos  
135 after ICSI in pHe of  $7.3 \pm 0.02$ . “Arm III” is to culture oocytes and resulting embryos after  
136 ICSI in pHe of  $7.4 \pm 0.02$ . This trial will include intracytoplasmic sperm injection (ICSI)  
137 cycles.

**138 Patient and Public Involvement**

139 No patient involved

**140 Randomization and Masking**

141 Using an online tool, participants will be randomised to the experimental arms with a 1:1:1  
142 allocation ratio. The allocation sequence of participants will be generated using a permuted  
143 block randomization of 3, 6 and 9 block sizes with unique identifiers in random order,  
144 stratified by trial site. Randomization of participants and its storage in sequentially numbered,  
145 opaque, sealed envelopes will occur by a secretary with no involvement in patient care and  
146 will be provided to trial sites before enrolment of first participant. Eligible participants will  
147 be allocated to the relevant arms on the day of maturation trigger and allocation result will be  
148 communicated to the laboratory team. Participants, clinicians and outcome assessors for the  
149 clinical outcomes will be unaware of the allocation, while embryologists who will assess  
150 embryo development will be aware of the allocation.

**151 Participants**

152 The inclusion criteria include:

- 153 1) Women age of  $\geq 18$  to  $\leq 40$ ;
- 154 2) BMI of  $\leq 31$ ;
- 155 3) Anticipated normal responder ( $\geq 5$  antral follicle count or  $\geq 5.4$  pmol/L AMH);

- 1  
2  
3 156 4) Women who have  $\geq 1$  year of primary or secondary infertility;  
4  
5 157 5) Fresh ejaculate sperm of any count provided they have  $\geq 1\%$  normal forms and a motile  
6  
7 fraction;  
8 158  
9  
10 159 6) Women undergoing their first ICSI cycle or their second ICSI cycle after previous  
11  
12 160 successful one;  
13  
14 161 7) Women with  $> 7$  mm endometrial thickness at day of trigger;  
15  
16 and 8) Women with no detected uterine abnormality on transvaginal ultrasound (e.g.  
17 162  
18 submucosal myomas, polyps or septa).  
19 163

20  
21 164 ***Women will be excluded if they have:***

- 22  
23 165 1) Unilateral oophorectomy;  
24  
25 166 2) Abnormal karyotyping for them or their male partners;  
26  
27 167 3) History of repeated abortions or implantation failure;  
28  
29 168 4) Uncontrolled diabetes;  
30  
31 169 5) Liver or renal disease;  
32  
33 170 6) History of severe ovarian hyperstimulation;  
34  
35 171 7) History of malignancy or borderline pathology;  
36  
37 172 8) Endometriosis;  
38  
39 173 9) Plan for PGD-A;  
40  
41 174 10) Severe male factor includes surgical sperm retrieval or cryopreserved sperm;  
42  
43 and 11) PCOS, women with history of severe OHSS, and cycles with agonist trigger or any  
44  
45 patient with a plan for a “freeze-all”.  
46  
47  
48  
49 176

50  
51 177 **Stimulation Protocol, Oocyte retrieval, and Luteal Phase Support**

52  
53 178 Women will undergo controlled ovarian stimulation with agonist mid-luteal pituitary down-  
54  
55 regulation (Decapeptyl<sup>®</sup> 0.1mg, Ferring, Switzerland) or antagonist (Cetrotide<sup>®</sup> 0.25 mg,  
56 179  
57 Merck Serono) protocols. Agonist will start on day 19–21 of the preceding cycle and will  
58 180  
59  
60

1  
2  
3 181 continue to the day of maturation trigger. For Antagonist group, women will start the  
4  
5 182 antagonist on day 6 of treatment cycle. All women will receive follicular stimulating  
6  
7 183 hormone (rFSH; Gonal-F, Merck Serono) and human menopausal gonadotropin (HMG;  
8  
9 184 Menogon, Ferring) at 150-300 IU with a 2:1 ratio from cycle day 2 through follicular  
10  
11 185 maturation, with adjustment of the dosage according to the response. When  $\geq 3$  follicles  
12  
13 186 measure  $\geq 18$  mm mean diameter on ultrasound, women will receive a 10,000 IU hCG trigger  
14  
15 187 shot (Choriomon, IBSA) for final oocyte maturation. Oocyte retrieval will be performed 37  
16  
17 188 hours after hCG trigger under transvaginal sonographic guidance. Follicular aspirates will be  
18  
19 189 handled in HEPES-buffered medium (global® HEPES, LifeGlobal, Canada) at 37°C using  
20  
21 190 tube warmers. Luteal-phase support will be achieved with intramuscular progesterone (100  
22  
23 191 mg/mL [Prontogest, IBSA]) once daily or vaginal pessaries (400 mg prontogest) twice daily,  
24  
25 192 starting on day 1 after retrieval (“day 1”) to 12 weeks of gestation, unless negative  
26  
27 193 pregnancy.

### 194 **Sperm Preparation, Oocyte Denudation and ICSI.**

195 Semen samples will be processed through density gradient,<sup>18</sup> using Puresperm (Nidacon,  
196 Sweden). The pellet will undergo once washing and incubation at room temperature in  
197 HEPES buffered medium (AllGrade Wash, LifeGlobal). Denudation of oocytes will occur  
198 immediately after collection using 40 IU hyaluronidase (LifeGlobal, Canada) diluted in  
199 Global HEPES and a stripper of 170 micrometre (Cook, US). Metaphase II (MII) oocytes  
200 will undergo ICSI in Global HEPES medium under inverted microscope as previously  
201 described.<sup>19</sup>

202

### 203 **Incubator Management and pH Adjustment**

204 Incubators for this study involve Labo C-Top (Labotect, Germany), Minc 1000 (Cook, US),  
205 and AD-3100 (Astec, Japan). Each centre will use no more than a brand of incubator to

1  
2  
3 206 account for incubator as variable. If another brand of incubators will be used, we will ensure  
4  
5 207 they are humidified. Dry incubators such as ESCO (Esco Micro Pte. Ltd, Singapore) may be  
6  
7 208 used at some centres; however, we will adjust the analysis by trial site to account for  
8  
9 209 differences between centres. Incubators will undergo stringent control of temperature  
10  
11 210 ( $36.9\pm 0.1^{\circ}\text{C}$ ). The temperature will be validated daily using a certified thermometer.  
12  
13 211 Incubator's  $\text{CO}_2$  and  $\text{O}_2$  will be measured daily using a certified gas analyser to ensure 5%  $\text{O}_2$   
14  
15 212 and a proper  $\text{CO}_2$  concentration to achieve the required pH. All the three measurements  
16  
17 213 (temperature,  $\text{CO}_2$  level, and pH levels) will be verified by well-trained person traveling  
18  
19 214 across the sites. Incubators will undergo sterilization with 6%  $\text{H}_2\text{O}_2$  every four weeks, with  
20  
21 215 installation of inline filters (Green, Lifeglobal, CooperSurgical).<sup>20</sup>  
22  
23 216 A minimum of 3 incubators of a single brand within each participating facility with different  
24  
25 217 levels of pH representing the study arms is obligatory: Incubator A of  $7.2\pm 0.02$  pH, Incubator  
26  
27 218 B of  $7.3\pm 0.02$  pH, and Incubator C of  $7.4\pm 0.02$ . The three incubators will undergo a strict  
28  
29 219 adjustment of the required pH using a handheld blood gas analyser (Epoc® Reader and Host;  
30  
31 220 BGEM card US). Constant pH levels will be ensured with twice weekly measurement of pH  
32  
33 221 with blood gas analyser and a daily measurement of  $\text{CO}_2$  level of incubators. Measurement of  
34  
35 222 pH will occur after an overnight incubation of 1mL culture media in a central well dish  
36  
37 223 covered with 0.4mL of oil. In the morning and before opening of incubators, the handheld  
38  
39 224 blood gas analyser (Epoc® Reader and Host; BGEM card US) will undergo preparation for  
40  
41 225 measuring pH as per the manufacturer protocol. Briefly, after switching on the device,  
42  
43 226 calibration of the device automatically occurs. Next, we adjust the temperature to  $37^{\circ}\text{C}$ , and  
44  
45 227 select the sample as arterial. Next, we insert the card, which undergoes automatic calibration.  
46  
47 228 Next, when the device is ready, it asks to inject sample. Next, using 1mL syringe attached to  
48  
49 229 wide needle calibre, we aspirate 0.5mL of the culture medium under oil. Next, we discard the  
50  
51 230 first droplet and smoothly inject the sample until the beep. We can see the results of pH,  
52  
53  
54  
55  
56  
57  
58  
59  
60

1  
2  
3 231 partial CO<sub>2</sub> and O<sub>2</sub> pressures thereafter. Each laboratory will report the results to also  
4  
5 232 compare the resulting partial pressures of CO<sub>2</sub> and O<sub>2</sub> with the incubator display. pH levels  
6  
7 233 will also be measured every new batch of a culture medium. The measurement of pH and  
8  
9 234 CO<sub>2</sub> across the centres will be performed using a one-brand equipment that will undergo  
10  
11 235 periodic calibration together. To account for errors in measurement, one well-trained  
12  
13 236 personnel will be assigned to measure the pH and double check the CO<sub>2</sub> level across the  
14  
15 237 centres.  
16  
17  
18

### 19 238 **Culture Protocol and Embryo Scoring**

20  
21 239 Each culture dish (micro-droplet, Vitrolife) will hold 12 droplets of 20 µl each from Global  
22  
23 240 Total culture medium (Lifeglobal, CooperSurgical, US) overlaid with 5 ml of oil (NidOil,  
24  
25 241 Nidacon). If a decision to change culture media at any time point of the study conduct is  
26  
27 242 made, this will be performed at the same time across the study sites. Dishes will undergo  
28  
29 243 overnight incubation in the relevant incubator adjusted to the relevant pH as per the  
30  
31 244 randomization. After ICSI, the injected oocytes will undergo washing in culture medium  
32  
33 245 followed by incubation from day 0 through day 5 or 6 in the relevant arm of pH, except for a  
34  
35 246 small portion of embryos transferred on day 3. The inseminated oocytes will undergo culture  
36  
37 247 in groups of 3 each from days 0 to 5/6, with removal of the unfertilized, abnormally fertilized  
38  
39 248 or degenerated oocytes at fertilization check. Two embryologists will perform the  
40  
41 249 fertilization check and embryo grading on day 1, 2 and 3 of culture as per the Istanbul  
42  
43 250 Consensus.<sup>21</sup> All laboratories will vitrify embryos no earlier than day 5. Embryos are suitable  
44  
45 251 for transfer or vitrification on day 5 provided they are graded 311 as per the Istanbul  
46  
47 252 Consensus.<sup>21</sup> Embryos utilized for transfer or cryopreservation will be pictured and recorded  
48  
49 253 in the patient file. All the recorded pictures from all centres will undergo blind grading by  
50  
51 254 two independent experienced embryologists.  
52  
53  
54  
55  
56  
57

### 58 255 **Embryo Transfer**

1  
2  
3 256 Women will undergo fresh embryo transfer by replacing one to two embryos on day 5 with  
4  
5 257 those who replaced embryos on day 3 will be reported as per each centre protocol, except for  
6  
7 258 women with reduced uterine cavity or previous preterm birth, they will replace only one  
8  
9 259 embryo. One participating centre will transfer majority of its cases on day 3. This issue will  
10  
11 260 be accounted for by adjusting the analysis by trial site. Embryo transfer will occur under  
12  
13 261 sonographic guidance using Sydney IVF Transfer Set (Cook, US) as per each centre  
14  
15 262 standardized protocol. The rest of the utilizable embryos will undergo vitrification for  
16  
17 263 transfer in subsequent cycles, while we plan to monitor the cumulative live birth resulted  
18  
19 264 from fresh and vitrified-warmed transfer within one year of randomization. Women will test  
20  
21 265 for biochemical pregnancy 14 days after oocyte retrieval with serum hCG level, and will  
22  
23 266 confirm pregnancy at  $\geq$  week 7 of gestation by detection of intrauterine sac with a heartbeat  
24  
25 267 on ultrasound.

### 268 **Outcome Measures**

269 Each outcome will be calculated including all randomised participants in the arms to which  
270 they were allocated, with the exception of implantation rate, which will be interpreted  
271 cautiously due to concerns over its validity as a measure of treatment effect, and perinatal  
272 outcomes, which by definition are only available in the subset of participants achieving live  
273 birth. This study will adopt the COMMIT definitions of outcomes,<sup>22</sup> where appropriate.

#### 274 ***Primary outcome***

275 Live birth (delivery of one or more viable infants  $>$  20<sup>th</sup> weeks of gestation).

#### 276 ***Secondary outcomes***

- 277 1) Biochemical pregnancy (positive  $\beta$ hCG  $\geq$  10 IU/L at 14 days after egg retrieval).  
278 2) Clinical pregnancy (registered sacs with a heartbeat on ultrasound  $>$  7<sup>th</sup> weeks of  
279 gestation).  
280 3) Ongoing pregnancy (continued viable pregnancy  $>$  20<sup>th</sup> weeks of gestation).



- 1  
2  
3 281 4) Miscarriage (loss of a clinical pregnancy  $\leq 20^{\text{th}}$  weeks of gestation).  
4  
5 282 5) Term live-birth (i.e. delivery of one or more viable infants  $\geq 37$  weeks of gestation).  
6  
7 283 6) Preterm Birth (delivery of one or more viable infants  $< 37^{\text{th}}$  weeks of gestation).  
8  
9  
10 284 7) Very preterm birth (delivery of one or more viable infants  $< 32^{\text{nd}}$  weeks of gestation).  
11  
12 285 8) Low birth weight babies (babies with  $< 2500$  gm within 24 hours of delivery)  
13  
14 286 9) Congenital malformation (delivery of congenitally malformed babies).  
15  
16  
17 287 10) Still Birth (delivery of nonviable babies  $> 20$  weeks of gestation).  
18  
19 288 11) Cumulative live birth (registered viable neonates after one fresh plus one vitrified-  
20  
21 289 warmed within one year of randomization).  
22  
23 290 12) Fertilization (presence of 2 pronuclei  $17 \pm 1$  hr after ICSI).  
24  
25 291 13) Embryo cleavage (cleaved embryos per fertilized oocyte).  
26  
27 292 14) Top-quality embryo on day 3 (7-8 cells with appropriate-sizes blastomeres and less than  
28  
29 293 10% fragmentation by volume).  
30  
31 294 15) Blastocyst formation on day 5 or 6 (formed blastocysts per fertilized oocyte).  
32  
33 295 16) Top-quality blastocyst on day 5 (rounded and dense inner cell mass with many  
34  
35 296 trophectodermal cells creating a connected zone and a blastocoel more than 100% by volume;  
36  
37 297  $\geq 311$  grade per fertilized oocyte).  
38  
39 298 17) Cryopreservation (cryopreserved embryos per fertilized oocyte).  
40  
41 299 18) Live-birth-implantation rate (live birth per embryo transferred).  
42  
43 300 19) Utilized embryos (number of cryopreserved plus transferred embryos per fertilized  
44  
45 301 oocyte).  
46  
47 302 20) Top-quality utilized embryos (number of high-quality embryos transferred plus blastocyst  
48  
49 303 cryopreserved of 311 grade per fertilized oocyte).  
50  
51  
52  
53  
54  
55

## 304 **Statistical Analysis**

### 305 ***Sample size estimation***



1  
2  
3 306 This is a three-arm study looking at pH over a range of 7.2 to 7.4. The hypothesis to be tested  
4  
5 307 is that adjusting the pH value to the edges of this range might result in improvements to the  
6  
7 308 live birth rate, although we remain in equipoise as to whether higher or lower values will be  
8  
9  
10 309 optimal. On the basis of internal data, live birth rates in the region of 25-35% are typical, and  
11  
12 310 our goal is to investigate whether this is associated with varying pH.

13  
14 311 The study has been powered for a global test of the effect of pH, calculated using plausible  
15  
16 312 birth rates in the three groups of 25%, 30%, and 35%. 646 participants per arm yields 98%  
17  
18 313 power in this scenario, using a 5% significance level. This test makes no assumption about  
19  
20 314 the ordering of the live birth rates in relation to the ordering of the pH values. The high power  
21  
22 315 level has been adopted to allow for some leeway in relation to the minimum effect size. For  
23  
24 316 illustration, if the birth rates were slightly less distinct, with 26%, 30%, 33% (a spread of just  
25  
26 317 seven percentage points) this sample size yields 85% power against a 5% significance level,  
27  
28 318 and 65% at a 1% significance level. We have also been conservative in our inflation of  
29  
30 319 numbers for dropout. We have allowed for 5% loss to follow up, inflating our group size to  
31  
32 320 680. In reality, we will conduct analysis on an intention to treat basis, including all  
33  
34 321 randomised women. Women who do not complete treatment (for example, they do not  
35  
36 322 undergo embryo transfer) will be counted as not having a live birth. The only exceptions to  
37  
38 323 this will be participants who withdraw consent for their data to be used in the study. Our  
39  
40 324 inflation for loss to follow up reflects this possibility.

41  
42 325 We also note that adjustment for site and age in the analysis will increase power further.

43  
44 326

### 45 327 *Analytical methods*

46  
47 328 The study conduct will be according to the intention-to-treat approach, where each participant  
48  
49 329 randomised will be included in the analysis, regardless of protocol deviation. The primary  
50  
51 330 analysis of live birth will be conducted using logistic regression, with live birth event  
52  
53  
54  
55  
56  
57  
58  
59  
60

1  
2  
3 331 regressed on pH group, adjusted for study site and participant age, which will be standardised  
4  
5 332 before being entered as a covariate. pH will be entered as a categorical covariate, allowing a  
6  
7  
8 333 Likelihood Ratio test of the association between pH and live birth rate across the three groups  
9  
10 334 to be performed. Secondary supportive analyses will be conducted to try to characterise the  
11  
12 335 nature of any association. This will include a test of linear trend in live birth rates across pH  
13  
14 336 groups, which would imply an optimal pH level for the lowest or highest value, as well as  
15  
16 337 pairwise comparisons between each group (again, these analyses will be adjusted for site and  
17  
18 338 age). The pairwise comparisons will focus on size and precision of the odds ratios. Although  
19  
20 339 it would be desirable to power the study for all pairwise comparisons as the primary outcome,  
21  
22 340 this yields impracticable sample sizes (> 4000 participants) against realistic effects. The study  
23  
24 341 has therefore been designed to represent the most informative test of the hypothesis that pH  
25  
26 342 level affects live birth, that is practicable.  
27  
28  
29  
30  
31 343

32  
33 344 For secondary outcomes, binary variables will be analysed in an analogous fashion to the  
34  
35 345 primary analysis. Count variables will be analysed using Poisson regression, with zero-  
36  
37 346 inflated models wherever the outcome is structurally undefined for some participants. Again,  
38  
39 347 these will be adjusted for site and age. In the analysis of number of usable embryos,  
40  
41 348 implanted embryos arising from the day 3 transfer will be included as formed and good  
42  
43 349 quality blastocysts, while those that do not implant in this portion will be considered blocked  
44  
45 350 at day 3. The total of the number of embryos transferred and the formed blastocysts will be  
46  
47 351 used to calculate number of utilizable embryos. A 1% significance level will be employed.  
48  
49 352 Due to the short treatment duration, it is anticipated that loss to follow up will be minimal,  
50  
51 353 but if any loss does occur then these participants will be analysed as having negative status  
52  
53 354 for the primary outcome, unless consent to use data is withdrawn. The follow-up period is  
54  
55  
56  
57  
58  
59  
60

1  
2  
3 355 identified as one year from randomization of the last participant provided that all pregnant  
4  
5 356 women have given birth.

### 8 357 **Discussion**

10 358 Given the lack of evidence for a superior pH level for human embryo culture and whether  
11  
12 359 the pH level could make a difference in live birth after IVF, this trial is performed. This trial  
13  
14 360 is expected to fill the gap in this area leaving the recommendations of manufactures of culture  
15  
16 361 media to a solid base relying on evidence. The trial power is set to be high (>90%, with a 1%  
17  
18 362 significance level) to minimize the risk for uninformative results. In any occasion of  
19  
20 363 cleavage-stage transfer, the calculation of the blastocyst formation will be based on the  
21  
22 364 assumption that embryos that will implant will be calculated as a formed blastocyst, while the  
23  
24 365 failure of implantation of an embryo will be considered as embryo block at the cleavage  
25  
26 366 stage. Although this is not the ideal track to calculate blastocyst formation, we find this  
27  
28 367 assumption is the closest one to reflect the blastocyst formation. This will be further  
29  
30 368 discussed when this trial is reported.

### 35 369 **Funding and conflict of interest**

37 370 The study receives no fund and the authors have no conflict of interest to declare.

### 40 371 **Authors' contributions**

42 372 Mohamed is the creator of the concept and design of the study, and is the principal  
43  
44 373 investigator of the study. Mohamed Fawzy is also a supervisor for the study conduct across  
45  
46 374 the sites and will make sure that data is periodically sent to for storage in independent  
47  
48 375 database. Jack Wilkinson is the statistician of the study who revised the study design and  
49  
50 376 calculated the sample size and power of the study and he will be responsible for the data  
51  
52 377 analysis and data transfer to the independent safety and monitoring committee. Mai Emad is a  
53  
54 378 primary investigator at Banon IVF centre and a sub-investigator at Ibsina Centre, and she  
55  
56 379 participated in revising the trial protocol and will participate in trial reporting thereafter.  
57  
58  
59  
60

1  
2  
3 380 Ragaa Mansour is a primary investigator at the Egyptian IVF-ET Centre, and revised the trial  
4  
5 381 protocol and provided advice during the protocol design. Ali Mahran is the andrologist of the  
6  
7 382 study that will make sure all male partners are in line with the inclusion criteria, and revised  
8  
9 383 the protocol and provided comments. Ahmed Fetih is a primary investigator at Banon IVF  
10  
11 384 Centre and participated revising the protocol and provided comments. Mohamed  
12  
13 385 AbdelRahman participated in the trial design and is a primary investigator at Amshaj IVF  
14  
15 386 Centre. Hazem Abdelghafar is a primary investigator at Ibsina IVF Centre and participated  
16  
17 387 in the trial design. All authors provided comments and agreed on the study design and  
18  
19 388 protocol, and will participate in reporting this trial thereafter.  
20  
21  
22  
23

## 24 389 **References**

- 25  
26 390 1. Smith A, Tilling K, Nelson SM, et al. Live-Birth Rate Associated With Repeat In Vitro  
27 391 Fertilization Treatment Cycles. *JAMA* 2015;314(24):2654-62. doi:  
28 392 10.1001/jama.2015.17296 [published Online First: 2015/12/31]  
29  
30 393 2. Berntsen S, Söderström-Anttila V, Wennerholm U-B, et al. The health of children  
31 394 conceived by ART: 'the chicken or the egg?'. *Human Reproduction Update*  
32 395 2019;25(2):137-58. doi: 10.1093/humupd/dmz001  
33 396 3. Pool TB, Schoolfield J, Han D. Human embryo culture media comparisons. *Methods Mol*  
34 397 *Biol* 2012;912:367-86. doi: 10.1007/978-1-61779-971-6\_21 [published Online First:  
35 398 2012/07/26]  
36 399 4. Swain JE. Is there an optimal pH for culture media used in clinical IVF? *Hum Reprod*  
37 400 *Update* 2012;18(3):333-9. doi: 10.1093/humupd/dmr053 [published Online First:  
38 401 2012/02/09]  
39 402 5. Tarahomi M, de Melker AA, van Wely M, et al. pH stability of human preimplantation  
40 403 embryo culture media: effects of culture and batches. *Reprod Biomed Online*  
41 404 2018;37(4):409-14. doi: 10.1016/j.rbmo.2018.08.011 [published Online First:  
42 405 2018/09/20]  
43 406 6. Shalgi R, Kraicer PF, Soferman N. Gases and electrolytes of human follicular fluid. *J*  
44 407 *Reprod Fertil* 1972;28(3):335-40. [published Online First: 1972/03/01]  
45 408 7. Phillips KP, Leveille MC, Claman P, et al. Intracellular pH regulation in human  
46 409 preimplantation embryos. *Hum Reprod* 2000;15(4):896-904. doi:  
47 410 10.1093/humrep/15.4.896 [published Online First: 2000/03/31]  
48 411 8. FitzHarris G, Siyanov V, Baltz JM. Granulosa cells regulate oocyte intracellular pH  
49 412 against acidosis in preantral follicles by multiple mechanisms. *Development*  
50 413 2007;134(23):4283-95. doi: 10.1242/dev.005272 [published Online First: 2007/11/06]  
51 414 9. Dale B, Menezo Y, Cohen J, et al. Intracellular pH regulation in the human oocyte. *Hum*  
52 415 *Reprod* 1998;13(4):964-70. doi: 10.1093/humrep/13.4.964 [published Online First:  
53 416 1998/06/10]  
54 417 10. Lane M, Baltz JM, Bavister BD. Na<sup>+</sup>/H<sup>+</sup> antiporter activity in hamster embryos is  
55 418 activated during fertilization. *Dev Biol* 1999;208(1):244-52. doi:  
56 419 10.1006/dbio.1999.9198 [published Online First: 1999/03/17]

- 1  
2  
3 420 11. Swain JE, Pool TB. New pH-buffering system for media utilized during gamete and  
4 421 embryo manipulations for assisted reproduction. *Reprod Biomed Online*  
5 422 2009;18(6):799-810. [published Online First: 2009/06/06]
- 6 423 12. Hentemann M, Mousavi K, Bertheussen K. Differential pH in embryo culture. *Fertil*  
7 424 *Steril* 2011;95(4):1291-4. doi: 10.1016/j.fertnstert.2010.10.018 [published Online  
8 425 First: 2010/11/12]
- 9 426 13. Carney EW, Bavister BD. Regulation of hamster embryo development in vitro by carbon  
10 427 dioxide. *Biol Reprod* 1987;36(5):1155-63. doi: 10.1095/biolreprod36.5.1155  
11 428 [published Online First: 1987/06/01]
- 12 429 14. Edwards LJ, Williams DA, Gardner DK. Intracellular pH of the mouse preimplantation  
13 430 embryo: amino acids act as buffers of intracellular pH. *Hum Reprod*  
14 431 1998;13(12):3441-8. doi: 10.1093/humrep/13.12.3441 [published Online First:  
15 432 1999/01/14]
- 16 433 15. Edwards LJ, Williams DA, Gardner DK. Intracellular pH of the preimplantation mouse  
17 434 embryo: effects of extracellular pH and weak acids. *Mol Reprod Dev* 1998;50(4):434-  
18 435 42. doi: 10.1002/(SICI)1098-2795(199808)50:4<434::AID-MRD7>3.0.CO;2-J  
19 436 [published Online First: 1998/07/21]
- 20 437 16. Williams JR. The Declaration of Helsinki and public health. *Bull World Health Organ*  
21 438 2008;86(8):650-2. doi: 10.2471/blt.08.050955 [published Online First: 2008/09/18]
- 22 439 17. Schulz KF, Altman DG, Moher D, et al. CONSORT 2010 statement: updated guidelines  
23 440 for reporting parallel group randomised trials. *BMJ* 2010;340:c332. doi:  
24 441 10.1136/bmj.c332 [published Online First: 2010/03/25]
- 25 442 18. World Health Organization. WHO laboratory manual for the examination and processing  
26 443 of human semen. 5th ed. Geneva: World Health Organization 2010.
- 27 444 19. Palermo G, Joris H, Devroey P, et al. Pregnancies after intracytoplasmic injection of  
28 445 single spermatozoon into an oocyte. *Lancet* 1992;340(8810):17-8. doi: 10.1016/0140-  
29 446 6736(92)92425-f [published Online First: 1992/07/04]
- 30 447 20. Mortimer D, Cohen J, Mortimer ST, et al. Cairo consensus on the IVF laboratory  
31 448 environment and air quality: report of an expert meeting. *Reprod Biomed Online*  
32 449 2018;36(6):658-74. doi: 10.1016/j.rbmo.2018.02.005 [published Online First:  
33 450 2018/04/17]
- 34 451 21. Medicine ASIR, Embryology ESIG. Istanbul consensus workshop on embryo assessment:  
35 452 proceedings of an expert meeting. *Reprod Biomed Online* 2011;22(6):632-46. doi:  
36 453 10.1016/j.rbmo.2011.02.001 [published Online First: 2011/04/13]
- 37 454 22. Duffy JMN, Bhattacharya S, Curtis C, et al. A protocol developing, disseminating and  
38 455 implementing a core outcome set for infertility. *Hum Reprod Open*  
39 456 2018;2018(3):hoy007. doi: 10.1093/hropen/hoy007 [published Online First:  
40 457 2019/03/22]
- 41 458

42  
43  
44  
45  
46  
47  
48  
49 459 Figure Legend: Trial plan for enrolment  
50  
51  
52  
53  
54  
55  
56  
57  
58  
59  
60

1  
2  
3  
4  
5  
6  
7  
8  
9  
10  
11  
12  
13  
14  
15  
16  
17  
18  
19  
20  
21  
22  
23  
24  
25  
26  
27  
28  
29  
30  
31  
32  
33  
34  
35  
36  
37  
38  
39  
40  
41  
42  
43  
44  
45  
46  
47  
48  
49  
50  
51  
52  
53  
54  
55  
56  
57  
58  
59  
60

Couples will receive detailed information on the possible risks and potential benefits.

Couples with primary acceptance will be randomized to the three pH arms of the study

Randomization will occur to assign ~ 2100 participants to undergo day-5 fresh embryo-transfer utilizing the blastocysts developed in the either 7.2, 7.3 or 7.4 pH levels.

### Women randomization

~ 700 participants will be randomized to undergo embryo culture in 7.2 pH level for 5 to 6 days and will receive fresh embryo transfer from this arm.

~ 700 participants will be randomized to undergo embryo culture in 7.3 pH level for 5 to 6 days and will receive fresh embryo transfer from this arm.

~ 700 participants will be randomized to undergo embryo culture in 7.4 pH level for 5 to 6 days and will receive fresh embryo transfer from this arm.

The intention-to-treat will include all randomized participants to 7.2 pH level group with the live birth rate as primary endpoint.

The intention-to-treat will include all randomized participants to 7.3 pH level group with the live birth rate as primary endpoint.

The intention-to-treat will include all randomized participants to 7.4 pH level group with the live birth rate as primary endpoint.

## pH trial plan for enrollment and outcomes – 7.2, 7.3 and 7.4 pH levels

# Reporting checklist for protocol of a clinical trial.

Based on the SPIRIT guidelines.

## Instructions to authors

Complete this checklist by entering the page numbers from your manuscript where readers will find each of the items listed below.

Your article may not currently address all the items on the checklist. Please modify your text to include the missing information. If you are certain that an item does not apply, please write "n/a" and provide a short explanation.

Upload your completed checklist as an extra file when you submit to a journal.

In your methods section, say that you used the SPIRIT reporting guidelines, and cite them as:

Chan A-W, Tetzlaff JM, Altman DG, Laupacis A, Gøtzsche PC, Krleža-Jerić K, Hróbjartsson A, Mann H, Dickersin K, Berlin J, Doré C, Parulekar W, Summerskill W, Groves T, Schulz K, Sox H, Rockhold FW, Rennie D, Moher D. SPIRIT 2013 Statement: Defining standard protocol items for clinical trials. *Ann Intern Med.* 2013;158(3):200-207

|                                             |                     | Reporting Item                                                                                               | Page Number |
|---------------------------------------------|---------------------|--------------------------------------------------------------------------------------------------------------|-------------|
| <b>Administrative information</b>           |                     |                                                                                                              |             |
| Title                                       | <a href="#">#1</a>  | Descriptive title identifying the study design, population, interventions, and, if applicable, trial acronym | 1           |
| Trial registration                          | <a href="#">#2a</a> | Trial identifier and registry name. If not yet registered, name of intended registry                         | 2           |
| Trial registration: data set                | <a href="#">#2b</a> | All items from the World Health Organization Trial Registration Data Set                                     | 4           |
| Protocol version                            | <a href="#">#3</a>  | Date and version identifier                                                                                  | 4           |
| Funding                                     | <a href="#">#4</a>  | Sources and types of financial, material, and other support                                                  | 13          |
| Roles and responsibilities: contributorship | <a href="#">#5a</a> | Names, affiliations, and roles of protocol contributors                                                      | 1           |



|    |                           |                     |                                                                    |       |
|----|---------------------------|---------------------|--------------------------------------------------------------------|-------|
| 1  | Roles and                 | <a href="#">#5b</a> | Name and contact information for the trial sponsor                 | 1     |
| 2  | responsibilities:         |                     |                                                                    |       |
| 3  | sponsor contact           |                     |                                                                    |       |
| 4  | information               |                     |                                                                    |       |
| 5  |                           |                     |                                                                    |       |
| 6  |                           |                     |                                                                    |       |
| 7  |                           |                     |                                                                    |       |
| 8  | Roles and                 | <a href="#">#5c</a> | Role of study sponsor and funders, if any, in study design;        | 13    |
| 9  | responsibilities:         |                     | collection, management, analysis, and interpretation of data;      |       |
| 10 | sponsor and funder        |                     | writing of the report; and the decision to submit the report for   |       |
| 11 |                           |                     | publication, including whether they will have ultimate authority   |       |
| 12 |                           |                     | over any of these activities                                       |       |
| 13 |                           |                     |                                                                    |       |
| 14 |                           |                     |                                                                    |       |
| 15 |                           |                     |                                                                    |       |
| 16 | Roles and                 | <a href="#">#5d</a> | Composition, roles, and responsibilities of the coordinating       | 4     |
| 17 | responsibilities:         |                     | centre, steering committee, endpoint adjudication committee,       |       |
| 18 | committees                |                     | data management team, and other individuals or groups              |       |
| 19 |                           |                     | overseeing the trial, if applicable (see Item 21a for data         |       |
| 20 |                           |                     | monitoring committee)                                              |       |
| 21 |                           |                     |                                                                    |       |
| 22 |                           |                     |                                                                    |       |
| 23 |                           |                     |                                                                    |       |
| 24 | <b>Introduction</b>       |                     |                                                                    |       |
| 25 |                           |                     |                                                                    |       |
| 26 |                           |                     |                                                                    |       |
| 27 | Background and            | <a href="#">#6a</a> | Description of research question and justification for undertaking | 2 & 3 |
| 28 | rationale                 |                     | the trial, including summary of relevant studies (published and    |       |
| 29 |                           |                     | unpublished) examining benefits and harms for each intervention    |       |
| 30 |                           |                     |                                                                    |       |
| 31 |                           |                     |                                                                    |       |
| 32 | Background and            | <a href="#">#6b</a> | Explanation for choice of comparators                              | 2 & 3 |
| 33 | rationale: choice of      |                     |                                                                    |       |
| 34 | comparators               |                     |                                                                    |       |
| 35 |                           |                     |                                                                    |       |
| 36 |                           |                     |                                                                    |       |
| 37 | Objectives                | <a href="#">#7</a>  | Specific objectives or hypotheses                                  | 3 & 4 |
| 38 |                           |                     |                                                                    |       |
| 39 |                           |                     |                                                                    |       |
| 40 | Trial design              | <a href="#">#8</a>  | Description of trial design including type of trial (eg, parallel  | 4     |
| 41 |                           |                     | group, crossover, factorial, single group), allocation ratio, and  |       |
| 42 |                           |                     | framework (eg, superiority, equivalence, non-inferiority,          |       |
| 43 |                           |                     | exploratory)                                                       |       |
| 44 |                           |                     |                                                                    |       |
| 45 |                           |                     |                                                                    |       |
| 46 | <b>Methods:</b>           |                     |                                                                    |       |
| 47 | <b>Participants,</b>      |                     |                                                                    |       |
| 48 | <b>interventions, and</b> |                     |                                                                    |       |
| 49 | <b>outcomes</b>           |                     |                                                                    |       |
| 50 |                           |                     |                                                                    |       |
| 51 |                           |                     |                                                                    |       |
| 52 |                           |                     |                                                                    |       |
| 53 | Study setting             | <a href="#">#9</a>  | Description of study settings (eg, community clinic, academic      | 4     |
| 54 |                           |                     | hospital) and list of countries where data will be collected.      |       |
| 55 |                           |                     | Reference to where list of study sites can be obtained             |       |
| 56 |                           |                     |                                                                    |       |
| 57 |                           |                     |                                                                    |       |
| 58 |                           |                     |                                                                    |       |
| 59 |                           |                     |                                                                    |       |
| 60 |                           |                     |                                                                    |       |



|    |                              |                      |                                                                                                                                                                                                                                                                                                                                                                                |         |
|----|------------------------------|----------------------|--------------------------------------------------------------------------------------------------------------------------------------------------------------------------------------------------------------------------------------------------------------------------------------------------------------------------------------------------------------------------------|---------|
| 1  | Eligibility criteria         | <a href="#">#10</a>  | Inclusion and exclusion criteria for participants. If applicable, eligibility criteria for study centres and individuals who will perform the interventions (eg, surgeons, psychotherapists)                                                                                                                                                                                   | 5 & 6   |
| 2  |                              |                      |                                                                                                                                                                                                                                                                                                                                                                                |         |
| 3  |                              |                      |                                                                                                                                                                                                                                                                                                                                                                                |         |
| 4  |                              |                      |                                                                                                                                                                                                                                                                                                                                                                                |         |
| 5  |                              |                      |                                                                                                                                                                                                                                                                                                                                                                                |         |
| 6  | Interventions:               | <a href="#">#11a</a> | Interventions for each group with sufficient detail to allow replication, including how and when they will be administered                                                                                                                                                                                                                                                     | 4 & 5   |
| 7  | description                  |                      |                                                                                                                                                                                                                                                                                                                                                                                |         |
| 8  |                              |                      |                                                                                                                                                                                                                                                                                                                                                                                |         |
| 9  |                              |                      |                                                                                                                                                                                                                                                                                                                                                                                |         |
| 10 | Interventions:               | <a href="#">#11b</a> | Criteria for discontinuing or modifying allocated interventions for a given trial participant (eg, drug dose change in response to harms, participant request, or improving / worsening disease)                                                                                                                                                                               | 4 & 5   |
| 11 | modifications                |                      |                                                                                                                                                                                                                                                                                                                                                                                |         |
| 12 |                              |                      |                                                                                                                                                                                                                                                                                                                                                                                |         |
| 13 |                              |                      |                                                                                                                                                                                                                                                                                                                                                                                |         |
| 14 |                              |                      |                                                                                                                                                                                                                                                                                                                                                                                |         |
| 15 | Interventions:               | <a href="#">#11c</a> | Strategies to improve adherence to intervention protocols, and any procedures for monitoring adherence (eg, drug tablet return; laboratory tests)                                                                                                                                                                                                                              | 4 & 5   |
| 16 | adherence                    |                      |                                                                                                                                                                                                                                                                                                                                                                                |         |
| 17 |                              |                      |                                                                                                                                                                                                                                                                                                                                                                                |         |
| 18 |                              |                      |                                                                                                                                                                                                                                                                                                                                                                                |         |
| 19 |                              |                      |                                                                                                                                                                                                                                                                                                                                                                                |         |
| 20 |                              |                      |                                                                                                                                                                                                                                                                                                                                                                                |         |
| 21 | Interventions:               | <a href="#">#11d</a> | Relevant concomitant care and interventions that are permitted or prohibited during the trial                                                                                                                                                                                                                                                                                  | 9       |
| 22 | concomitant care             |                      |                                                                                                                                                                                                                                                                                                                                                                                |         |
| 23 |                              |                      |                                                                                                                                                                                                                                                                                                                                                                                |         |
| 24 |                              |                      |                                                                                                                                                                                                                                                                                                                                                                                |         |
| 25 | Outcomes                     | <a href="#">#12</a>  | Primary, secondary, and other outcomes, including the specific measurement variable (eg, systolic blood pressure), analysis metric (eg, change from baseline, final value, time to event), method of aggregation (eg, median, proportion), and time point for each outcome. Explanation of the clinical relevance of chosen efficacy and harm outcomes is strongly recommended | 10 & 11 |
| 26 |                              |                      |                                                                                                                                                                                                                                                                                                                                                                                |         |
| 27 |                              |                      |                                                                                                                                                                                                                                                                                                                                                                                |         |
| 28 |                              |                      |                                                                                                                                                                                                                                                                                                                                                                                |         |
| 29 |                              |                      |                                                                                                                                                                                                                                                                                                                                                                                |         |
| 30 |                              |                      |                                                                                                                                                                                                                                                                                                                                                                                |         |
| 31 |                              |                      |                                                                                                                                                                                                                                                                                                                                                                                |         |
| 32 |                              |                      |                                                                                                                                                                                                                                                                                                                                                                                |         |
| 33 |                              |                      |                                                                                                                                                                                                                                                                                                                                                                                |         |
| 34 | Participant timeline         | <a href="#">#13</a>  | Time schedule of enrolment, interventions (including any run-ins and washouts), assessments, and visits for participants. A schematic diagram is highly recommended (see Figure)                                                                                                                                                                                               | 8       |
| 35 |                              |                      |                                                                                                                                                                                                                                                                                                                                                                                |         |
| 36 |                              |                      |                                                                                                                                                                                                                                                                                                                                                                                |         |
| 37 |                              |                      |                                                                                                                                                                                                                                                                                                                                                                                |         |
| 38 |                              |                      |                                                                                                                                                                                                                                                                                                                                                                                |         |
| 39 |                              |                      |                                                                                                                                                                                                                                                                                                                                                                                |         |
| 40 | Sample size                  | <a href="#">#14</a>  | Estimated number of participants needed to achieve study objectives and how it was determined, including clinical and statistical assumptions supporting any sample size calculations                                                                                                                                                                                          | 11 & 12 |
| 41 |                              |                      |                                                                                                                                                                                                                                                                                                                                                                                |         |
| 42 |                              |                      |                                                                                                                                                                                                                                                                                                                                                                                |         |
| 43 |                              |                      |                                                                                                                                                                                                                                                                                                                                                                                |         |
| 44 |                              |                      |                                                                                                                                                                                                                                                                                                                                                                                |         |
| 45 | Recruitment                  | <a href="#">#15</a>  | Strategies for achieving adequate participant enrolment to reach target sample size                                                                                                                                                                                                                                                                                            | 4       |
| 46 |                              |                      |                                                                                                                                                                                                                                                                                                                                                                                |         |
| 47 |                              |                      |                                                                                                                                                                                                                                                                                                                                                                                |         |
| 48 |                              |                      |                                                                                                                                                                                                                                                                                                                                                                                |         |
| 49 | <b>Methods: Assignment</b>   |                      |                                                                                                                                                                                                                                                                                                                                                                                |         |
| 50 | <b>of interventions (for</b> |                      |                                                                                                                                                                                                                                                                                                                                                                                |         |
| 51 | <b>controlled trials)</b>    |                      |                                                                                                                                                                                                                                                                                                                                                                                |         |
| 52 |                              |                      |                                                                                                                                                                                                                                                                                                                                                                                |         |
| 53 |                              |                      |                                                                                                                                                                                                                                                                                                                                                                                |         |
| 54 | Allocation: sequence         | <a href="#">#16a</a> | Method of generating the allocation sequence (eg, computer-generated random numbers), and list of any factors for stratification. To reduce predictability of a random sequence, details of any planned restriction (eg, blocking) should be                                                                                                                                   | 5       |
| 55 | generation                   |                      |                                                                                                                                                                                                                                                                                                                                                                                |         |
| 56 |                              |                      |                                                                                                                                                                                                                                                                                                                                                                                |         |
| 57 |                              |                      |                                                                                                                                                                                                                                                                                                                                                                                |         |
| 58 |                              |                      |                                                                                                                                                                                                                                                                                                                                                                                |         |
| 59 |                              |                      |                                                                                                                                                                                                                                                                                                                                                                                |         |
| 60 |                              |                      |                                                                                                                                                                                                                                                                                                                                                                                |         |

provided in a separate document that is unavailable to those who enrol participants or assign interventions

|    |                        |                      |                                                                     |         |
|----|------------------------|----------------------|---------------------------------------------------------------------|---------|
| 1  |                        |                      |                                                                     |         |
| 2  |                        |                      |                                                                     |         |
| 3  |                        |                      |                                                                     |         |
| 4  | Allocation             | <a href="#">#16b</a> | Mechanism of implementing the allocation sequence (eg, central      | 5       |
| 5  | concealment            |                      | telephone; sequentially numbered, opaque, sealed envelopes),        |         |
| 6  |                        |                      | describing any steps to conceal the sequence until interventions    |         |
| 7  | mechanism              |                      | are assigned                                                        |         |
| 8  |                        |                      |                                                                     |         |
| 9  |                        |                      |                                                                     |         |
| 10 |                        |                      |                                                                     |         |
| 11 | Allocation:            | <a href="#">#16c</a> | Who will generate the allocation sequence, who will enrol           | 5       |
| 12 | implementation         |                      | participants, and who will assign participants to interventions     |         |
| 13 |                        |                      |                                                                     |         |
| 14 | Blinding (masking)     | <a href="#">#17a</a> | Who will be blinded after assignment to interventions (eg, trial    | 5       |
| 15 |                        |                      | participants, care providers, outcome assessors, data analysts),    |         |
| 16 |                        |                      | and how                                                             |         |
| 17 |                        |                      |                                                                     |         |
| 18 |                        |                      |                                                                     |         |
| 19 |                        |                      |                                                                     |         |
| 20 | Blinding (masking):    | <a href="#">#17b</a> | If blinded, circumstances under which unblinding is permissible,    | 5       |
| 21 | emergency unblinding   |                      | and procedure for revealing a participant's allocated intervention  |         |
| 22 |                        |                      | during the trial                                                    |         |
| 23 |                        |                      |                                                                     |         |
| 24 |                        |                      |                                                                     |         |
| 25 | <b>Methods: Data</b>   |                      |                                                                     |         |
| 26 | <b>collection,</b>     |                      |                                                                     |         |
| 27 | <b>management, and</b> |                      |                                                                     |         |
| 28 | <b>analysis</b>        |                      |                                                                     |         |
| 29 |                        |                      |                                                                     |         |
| 30 |                        |                      |                                                                     |         |
| 31 |                        |                      |                                                                     |         |
| 32 | Data collection plan   | <a href="#">#18a</a> | Plans for assessment and collection of outcome, baseline, and       | 11      |
| 33 |                        |                      | other trial data, including any related processes to promote data   |         |
| 34 |                        |                      | quality (eg, duplicate measurements, training of assessors) and a   |         |
| 35 |                        |                      | description of study instruments (eg, questionnaires, laboratory    |         |
| 36 |                        |                      | tests) along with their reliability and validity, if known.         |         |
| 37 |                        |                      | Reference to where data collection forms can be found, if not in    |         |
| 38 |                        |                      | the protocol                                                        |         |
| 39 |                        |                      |                                                                     |         |
| 40 |                        |                      |                                                                     |         |
| 41 |                        |                      |                                                                     |         |
| 42 |                        |                      |                                                                     |         |
| 43 | Data collection plan:  | <a href="#">#18b</a> | Plans to promote participant retention and complete follow-up,      | 11      |
| 44 | retention              |                      | including list of any outcome data to be collected for participants |         |
| 45 |                        |                      | who discontinue or deviate from intervention protocols              |         |
| 46 |                        |                      |                                                                     |         |
| 47 |                        |                      |                                                                     |         |
| 48 | Data management        | <a href="#">#19</a>  | Plans for data entry, coding, security, and storage, including any  | 11      |
| 49 |                        |                      | related processes to promote data quality (eg, double data entry;   |         |
| 50 |                        |                      | range checks for data values). Reference to where details of data   |         |
| 51 |                        |                      | management procedures can be found, if not in the protocol          |         |
| 52 |                        |                      |                                                                     |         |
| 53 |                        |                      |                                                                     |         |
| 54 |                        |                      |                                                                     |         |
| 55 | Statistics: outcomes   | <a href="#">#20a</a> | Statistical methods for analysing primary and secondary             | 11 & 12 |
| 56 |                        |                      | outcomes. Reference to where other details of the statistical       |         |
| 57 |                        |                      | analysis plan can be found, if not in the protocol                  |         |
| 58 |                        |                      |                                                                     |         |
| 59 |                        |                      |                                                                     |         |
| 60 |                        |                      |                                                                     |         |

|    |                            |                      |                                                                    |         |
|----|----------------------------|----------------------|--------------------------------------------------------------------|---------|
| 1  | Statistics: additional     | <a href="#">#20b</a> | Methods for any additional analyses (eg, subgroup and adjusted     | 11 & 12 |
| 2  | analyses                   |                      | analyses)                                                          |         |
| 3  |                            |                      |                                                                    |         |
| 4  | Statistics: analysis       | <a href="#">#20c</a> | Definition of analysis population relating to protocol non-        | 11 & 12 |
| 5  | population and missing     |                      | adherence (eg, as randomised analysis), and any statistical        |         |
| 6  | data                       |                      | methods to handle missing data (eg, multiple imputation)           |         |
| 7  |                            |                      |                                                                    |         |
| 8  |                            |                      |                                                                    |         |
| 9  |                            |                      |                                                                    |         |
| 10 | <b>Methods: Monitoring</b> |                      |                                                                    |         |
| 11 |                            |                      |                                                                    |         |
| 12 | Data monitoring:           | <a href="#">#21a</a> | Composition of data monitoring committee (DMC); summary of         | 4       |
| 13 | formal committee           |                      | its role and reporting structure; statement of whether it is       |         |
| 14 |                            |                      | independent from the sponsor and competing interests; and          |         |
| 15 |                            |                      | reference to where further details about its charter can be found, |         |
| 16 |                            |                      | if not in the protocol. Alternatively, an explanation of why a     |         |
| 17 |                            |                      | DMC is not needed                                                  |         |
| 18 |                            |                      |                                                                    |         |
| 19 |                            |                      |                                                                    |         |
| 20 |                            |                      |                                                                    |         |
| 21 |                            |                      |                                                                    |         |
| 22 | Data monitoring:           | <a href="#">#21b</a> | Description of any interim analyses and stopping guidelines,       | 4, 11 & |
| 23 | interim analysis           |                      | including who will have access to these interim results and make   | 12      |
| 24 |                            |                      | the final decision to terminate the trial                          |         |
| 25 |                            |                      |                                                                    |         |
| 26 |                            |                      |                                                                    |         |
| 27 | Harms                      | <a href="#">#22</a>  | Plans for collecting, assessing, reporting, and managing solicited | 4       |
| 28 |                            |                      | and spontaneously reported adverse events and other unintended     |         |
| 29 |                            |                      | effects of trial interventions or trial conduct                    |         |
| 30 |                            |                      |                                                                    |         |
| 31 |                            |                      |                                                                    |         |
| 32 |                            |                      |                                                                    |         |
| 33 | Auditing                   | <a href="#">#23</a>  | Frequency and procedures for auditing trial conduct, if any, and   | 4       |
| 34 |                            |                      | whether the process will be independent from investigators and     |         |
| 35 |                            |                      | the sponsor                                                        |         |
| 36 |                            |                      |                                                                    |         |
| 37 |                            |                      |                                                                    |         |
| 38 | <b>Ethics and</b>          |                      |                                                                    |         |
| 39 | <b>dissemination</b>       |                      |                                                                    |         |
| 40 |                            |                      |                                                                    |         |
| 41 |                            |                      |                                                                    |         |
| 42 | Research ethics            | <a href="#">#24</a>  | Plans for seeking research ethics committee / institutional review | 4       |
| 43 | approval                   |                      | board (REC / IRB) approval                                         |         |
| 44 |                            |                      |                                                                    |         |
| 45 |                            |                      |                                                                    |         |
| 46 | Protocol amendments        | <a href="#">#25</a>  | Plans for communicating important protocol modifications (eg,      | 4       |
| 47 |                            |                      | changes to eligibility criteria, outcomes, analyses) to relevant   |         |
| 48 |                            |                      | parties (eg, investigators, REC / IRBs, trial participants, trial  |         |
| 49 |                            |                      | registries, journals, regulators)                                  |         |
| 50 |                            |                      |                                                                    |         |
| 51 |                            |                      |                                                                    |         |
| 52 |                            |                      |                                                                    |         |
| 53 | Consent or assent          | <a href="#">#26a</a> | Who will obtain informed consent or assent from potential trial    | 4       |
| 54 |                            |                      | participants or authorised surrogates, and how (see Item 32)       |         |
| 55 |                            |                      |                                                                    |         |
| 56 |                            |                      |                                                                    |         |
| 57 |                            |                      |                                                                    |         |
| 58 |                            |                      |                                                                    |         |
| 59 |                            |                      |                                                                    |         |
| 60 |                            |                      |                                                                    |         |

|    |                          |                      |                                                                      |     |
|----|--------------------------|----------------------|----------------------------------------------------------------------|-----|
| 1  | Consent or assent:       | <a href="#">#26b</a> | Additional consent provisions for collection and use of              | 4   |
| 2  | ancillary studies        |                      | participant data and biological specimens in ancillary studies, if   |     |
| 3  |                          |                      | applicable                                                           |     |
| 4  |                          |                      |                                                                      |     |
| 5  |                          |                      |                                                                      |     |
| 6  | Confidentiality          | <a href="#">#27</a>  | How personal information about potential and enrolled                | 4   |
| 7  |                          |                      | participants will be collected, shared, and maintained in order to   |     |
| 8  |                          |                      | protect confidentiality before, during, and after the trial          |     |
| 9  |                          |                      |                                                                      |     |
| 10 |                          |                      |                                                                      |     |
| 11 | Declaration of interests | <a href="#">#28</a>  | Financial and other competing interests for principal investigators  | 13  |
| 12 |                          |                      | for the overall trial and each study site                            |     |
| 13 |                          |                      |                                                                      |     |
| 14 |                          |                      |                                                                      |     |
| 15 | Data access              | <a href="#">#29</a>  | Statement of who will have access to the final trial dataset, and    | 4   |
| 16 |                          |                      | disclosure of contractual agreements that limit such access for      |     |
| 17 |                          |                      | investigators                                                        |     |
| 18 |                          |                      |                                                                      |     |
| 19 |                          |                      |                                                                      |     |
| 20 | Ancillary and post trial | <a href="#">#30</a>  | Provisions, if any, for ancillary and post-trial care, and for       | 4   |
| 21 | care                     |                      | compensation to those who suffer harm from trial participation       |     |
| 22 |                          |                      |                                                                      |     |
| 23 |                          |                      |                                                                      |     |
| 24 | Dissemination policy:    | <a href="#">#31a</a> | Plans for investigators and sponsor to communicate trial results     | 4   |
| 25 | trial results            |                      | to participants, healthcare professionals, the public, and other     |     |
| 26 |                          |                      | relevant groups (eg, via publication, reporting in results           |     |
| 27 |                          |                      | databases, or other data sharing arrangements), including any        |     |
| 28 |                          |                      | publication restrictions                                             |     |
| 29 |                          |                      |                                                                      |     |
| 30 |                          |                      |                                                                      |     |
| 31 |                          |                      |                                                                      |     |
| 32 |                          |                      |                                                                      |     |
| 33 | Dissemination policy:    | <a href="#">#31b</a> | Authorship eligibility guidelines and any intended use of            | 1   |
| 34 | authorship               |                      | professional writers                                                 |     |
| 35 |                          |                      |                                                                      |     |
| 36 |                          |                      |                                                                      |     |
| 37 | Dissemination policy:    | <a href="#">#31c</a> | Plans, if any, for granting public access to the full protocol,      | n/a |
| 38 | reproducible research    |                      | participant-level dataset, and statistical code                      |     |
| 39 |                          |                      |                                                                      |     |
| 40 |                          |                      |                                                                      |     |
| 41 | <b>Appendices</b>        |                      |                                                                      |     |
| 42 |                          |                      |                                                                      |     |
| 43 | Informed consent         | <a href="#">#32</a>  | Model consent form and other related documentation given to          | 4   |
| 44 | materials                |                      | participants and authorised surrogates                               |     |
| 45 |                          |                      |                                                                      |     |
| 46 |                          |                      |                                                                      |     |
| 47 | Biological specimens     | <a href="#">#33</a>  | Plans for collection, laboratory evaluation, and storage of          | n/a |
| 48 |                          |                      | biological specimens for genetic or molecular analysis in the        |     |
| 49 |                          |                      | current trial and for future use in ancillary studies, if applicable |     |
| 50 |                          |                      |                                                                      |     |
| 51 |                          |                      |                                                                      |     |

The SPIRIT checklist is distributed under the terms of the Creative Commons Attribution License CC-BY-ND 3.0. This checklist was completed on 09. September 2019 using <https://www.goodreports.org/>, a tool made by the [EQUATOR Network](#) in collaboration with [Penelope.ai](#)

# BMJ Open

## Triple-arm trial of pH (Tri-pH) effect on live birth after ICSI in Egyptian IVF facilities: Protocol of a randomised controlled trial

|                                 |                                                                                                                                                                                                                                                                                                                                                                                                                                                                                                                                                                                                                                                                                                                                                   |
|---------------------------------|---------------------------------------------------------------------------------------------------------------------------------------------------------------------------------------------------------------------------------------------------------------------------------------------------------------------------------------------------------------------------------------------------------------------------------------------------------------------------------------------------------------------------------------------------------------------------------------------------------------------------------------------------------------------------------------------------------------------------------------------------|
| Journal:                        | <i>BMJ Open</i>                                                                                                                                                                                                                                                                                                                                                                                                                                                                                                                                                                                                                                                                                                                                   |
| Manuscript ID                   | bmjopen-2019-034194.R3                                                                                                                                                                                                                                                                                                                                                                                                                                                                                                                                                                                                                                                                                                                            |
| Article Type:                   | Protocol                                                                                                                                                                                                                                                                                                                                                                                                                                                                                                                                                                                                                                                                                                                                          |
| Date Submitted by the Author:   | 16-Dec-2019                                                                                                                                                                                                                                                                                                                                                                                                                                                                                                                                                                                                                                                                                                                                       |
| Complete List of Authors:       | Fawzy, Mohamed; IbnSina Hospital, Ibsina IVF Centre; Banon IVF Centre<br>Emad, Mai; IbnSina Hospital, Ibsina IVF Centre; Banon IVF Centre<br>Wilkinson, Jack; University of Manchester, Centre for Biostatistics; Salford Royal NHS Foundation Trust, Research and Development<br>Mansour, Ragaa; Egyptian IVF-ET Center<br>Mahran, Ali; Assiut University Faculty of Medicine, Department of Dermatology, Venereology and Andrology<br>Fetih, Ahmed; Assiut University Faculty of Medicine, Department of Obstetrics and Gynecology<br>Abdelrahman , Mohamed; Sohag University Faculty of Medicine, Department of Obstetrics and Gynecology<br>AbdelGhafar, Hazem; Sohag University Faculty of Medicine, Department of Obstetrics and Gynecology |
| <b>Primary Subject Heading</b>: | Obstetrics and gynaecology                                                                                                                                                                                                                                                                                                                                                                                                                                                                                                                                                                                                                                                                                                                        |
| Secondary Subject Heading:      | Reproductive medicine, Obstetrics and gynaecology                                                                                                                                                                                                                                                                                                                                                                                                                                                                                                                                                                                                                                                                                                 |
| Keywords:                       | Embryo culture, pH level, culture media, blastocyst formation                                                                                                                                                                                                                                                                                                                                                                                                                                                                                                                                                                                                                                                                                     |
|                                 |                                                                                                                                                                                                                                                                                                                                                                                                                                                                                                                                                                                                                                                                                                                                                   |

SCHOLARONE™  
Manuscripts



I, the Submitting Author has the right to grant and does grant on behalf of all authors of the Work (as defined in the below author licence), an exclusive licence and/or a non-exclusive licence for contributions from authors who are: i) UK Crown employees; ii) where BMJ has agreed a CC-BY licence shall apply, and/or iii) in accordance with the terms applicable for US Federal Government officers or employees acting as part of their official duties; on a worldwide, perpetual, irrevocable, royalty-free basis to BMJ Publishing Group Ltd ("BMJ") its licensees and where the relevant Journal is co-owned by BMJ to the co-owners of the Journal, to publish the Work in this journal and any other BMJ products and to exploit all rights, as set out in our [licence](#).

The Submitting Author accepts and understands that any supply made under these terms is made by BMJ to the Submitting Author unless you are acting as an employee on behalf of your employer or a postgraduate student of an affiliated institution which is paying any applicable article publishing charge ("APC") for Open Access articles. Where the Submitting Author wishes to make the Work available on an Open Access basis (and intends to pay the relevant APC), the terms of reuse of such Open Access shall be governed by a Creative Commons licence – details of these licences and which [Creative Commons](#) licence will apply to this Work are set out in our licence referred to above.

Other than as permitted in any relevant BMJ Author's Self Archiving Policies, I confirm this Work has not been accepted for publication elsewhere, is not being considered for publication elsewhere and does not duplicate material already published. I confirm all authors consent to publication of this Work and authorise the granting of this licence.

## pH-Study Protocol

**Title: Triple-arm trial of pH (Tri-pH) effect on live birth after ICSI in Egyptian IVF facilities: Protocol of a randomised controlled trial**

Mohamed Fawzy,<sup>ab</sup> Mai Emad,<sup>ab</sup> Jack Wilkinson,<sup>c</sup> Ragaa Mansour,<sup>d</sup> Ali Mahran,<sup>d</sup> Ahmed N. Fetih,<sup>f</sup> Mohamed Y. AbdelRahman,<sup>g</sup> Hazem Abdelghafar,<sup>g</sup>

*IbnSina IVF Centre, Sohag and Banon IVF Centre, Assuit, Egypt*

<sup>a</sup>IbnSina IVF Centre, IbnSina Hospital, Sohag, Egypt; <sup>b</sup>Banon IVF Centre, Assiut, Egypt;

<sup>c</sup>Centre for Biostatistics, University of Manchester, UK; <sup>d</sup>Egyptian IVF-ET Centre, Cairo,

Egypt; <sup>e</sup>Department of Dermatology, Venereology and Andrology, Faculty of Medicine,

Assiut University, Egypt; <sup>f</sup>Department of Obstetrics and Gynecology, Faculty of Medicine,

Assiut University, Egypt; <sup>g</sup>Department of Obstetrics and Gynecology, Faculty of Medicine,

Sohag University, Egypt

Corresponding Author: Dr. Mohamed Fawzy, IVF Laboratory Director (IbnSina and Banon

IVF Centres), IbnSina Hospital, 146 El Aref Square, Sohag, Egypt; Cell: +201011122286; E-

mail: [drfawzy001@me.com](mailto:drfawzy001@me.com)

## Abstract

### Introduction

The pH of culture media for human in vitro fertilization (IVF) is a potential stressor that can affect pre- and post-implantation embryonic growth. There has been no clear evidence about the level that can support in vitro human embryo development optimally. Most manufactures of culture media have specified a range of 7.2 to 7.4, and routine practice is to use a level of 7.25 to 7.3 pH. However, these recommendations resulted from designers' opinions or experiments on mice models. There has been no randomised trial to search for the effect of pH level on live birth rate after IVF. The aim of this trial is to examine if there is an effect on live birth rate using three different levels of pH.

### Methods and analysis

This multicentre randomised trial will involve centres specialised in IVF in Egypt. Eligible women amenable for intracytoplasmic sperm injection (ICSI) will be randomized to undergo in vitro culture in either 7.2, 7.3 or 7.4 pH level. The study is designed to detect 10% difference in live birth rate with 93% per cent power at 1% significance level.

### Ethics and dissemination

Ethics review boards of the participating centres approved the study and eligible women will sign written informed consent before enrolment. The study has established an independent data monitoring and safety committee from international experts in the field and in trial design. We have no plan to disseminate the results to participants or any health communities except for the independent monitoring and safety committee established for this trial.

**Trial registration number** NCT02896777.

### Keywords

Embryo culture, pH level, culture media, blastocyst formation



1  
2  
3 55  
4  
5 56  
6 57  
7 58

### Strengths and limitations of this study

- 9 59
- The study is randomised controlled which reduces the possibility of bias.
- 11 60
- The study has an independent data monitoring committee with access to the data with
- 13 61
- no involvement in the study conduct.
- 15 62
- Two possible limitations of the study are that it will be conducted on ICSI cycles as
- 17 63
- ICSI is the preferred insemination method in the participating centres, and formed
- 19 64
- blastocyst calculation will be based on assumption for any cleavage-stage transfer.
- 21 65
- The embryologists will be aware of the culture arms during the study conduct.

### Background

26 66  
27 67  
28 68 Assisted reproductive techniques (ART) result in around 65% cumulative live birth within six  
29 69 cycles of *in vitro* fertilisation (IVF),<sup>1</sup> which is relatively suboptimal. In addition, IVF results  
30 70 in adverse perinatal outcomes, such as preterm birth and low birth weight babies compared  
31 71 with the *in vivo* conception.<sup>2</sup> These outcomes can rely on factors relating to patients,  
32 72 stimulation, and *in vitro* culture elements. In relation to embryo culture conditions, over 200  
33 73 variables have been identified as being potentially relevant to the cycle outcome.<sup>3</sup> One  
34 74 element that may influence embryo development *in vitro* is the pH level of a culture medium,  
35 75 which thus far has been determined by manufacturers of culture media without recourse to a  
36 76 well-powered randomized clinical trial (RCT).<sup>4</sup> The pH levels are potential stressors that vary  
37 77 between media brands and from batch-to-batch depending on the bicarbonate level in culture  
38 78 media and on the CO<sub>2</sub> level of incubators.<sup>5</sup> This would suggest that pH level can vary  
39 79 between incubators within the same laboratory if it is not well adjusted. Recommendations  
40 80 for measuring pH for embryo culture are variable between daily to monthly measurement.<sup>4</sup>

1  
2  
3 81 Oocytes and embryos have intracellular (pHi), which is modulated by the extracellular pH  
4  
5 82 (pHe).<sup>6</sup> The *in vitro* conditions including concentrations of bicarbonates, proteins, amino  
6  
7 83 acids in culture media and the CO<sub>2</sub> of incubators affect the pHe, which is a potential stressor.<sup>7</sup>  
8  
9  
10 84 The mechanism of pHi in oocyte and embryo is complex, regulating enzymatic activity, cell  
11  
12 85 division and differentiation, protein synthesis, metabolism, mitochondrial function,  
13  
14 86 cytoskeletal regulation, and microtubule dynamics.<sup>7,8</sup> Drifts in pHe translate into changes in  
15  
16 87 pHi, which can adversely affect cell function if the compensatory mechanisms failed to adapt  
17  
18 88 to restore pHi to a safe level.<sup>8</sup> The pHi can compensate through an active exchange among  
19  
20 89 Na<sup>+</sup>, HCO<sub>3</sub><sup>-</sup>/Cl<sup>-</sup> and Na<sup>+</sup>/H<sup>+</sup> to maintain it between 7 to 7.3.<sup>5,8</sup> Denuded oocyte for ICSI  
21  
22 90 through fertilization thereafter and vitrified-warmed embryos lack robust compensatory  
23  
24 91 mechanisms of pHi; therefore, drastic differences between pHe and pHi in these scenarios  
25  
26 92 can significantly perturbate embryo development.<sup>9-11</sup>  
27  
28  
29  
30 93 That being said, an optimum level of pH for human embryo culture *in vitro* is still unknown.<sup>4</sup>  
31  
32 94 <sup>9,12-15</sup> Most recommendations rely on mice models or manufacturers of culture media.  
33  
34  
35 95 Theoretically, a wide range of pHe levels (7.0–7.5) can support human embryo development  
36  
37 96 *in vitro*. However, a narrower range of pHe levels (7.2 to 7.4) is used in clinical practice. This  
38  
39 97 is because an extreme acidic pHe level ( $\leq 7$ ) can adversely affect oocyte spindle leading to no  
40  
41 98 further post-fertilization events.<sup>4</sup> This level of acidic pH can delay or block embryo  
42  
43 99 development *in vitro*.<sup>4</sup> Similar harms can theoretically occur for oocyte and embryo, if  
44  
45 100 alkaline levels of pHe ( $\geq 7.5$ ) are used.<sup>4</sup> Although these potential harms of extreme pHe  
46  
47 101 levels rely on animal models, underpowered studies, or anecdotal beliefs, we have decided to  
48  
49 102 investigate a safe range of pHe (7.2 to 7.4). Why this range has been chosen depends on the  
50  
51 103 recommendations of media manufactures and the clinical practice within the majority of  
52  
53 104 human embryo culture laboratories. Although this range of 7.2 to 7.4 is used, there is clear  
54  
55 105 evidence about which level of 7.2, 7.3, or 7.4 can support human embryos to result in live  
56  
57  
58  
59  
60

1  
2  
3 106 birth after transfer. This multicentre, randomized, clinical trial aims to identify whether pHe  
4  
5 107 levels of 7.2, 7.3, or 7.4 can perform better on live birth rate after ICSI in order to investigate  
6  
7  
8 108 the potential for optimisation.

### 109 **Methods and Design**

110 This protocol version one of a multicentre, randomized, triple-arm, triple-blind clinical trial  
111 (NCT02896777, registered at [www.ClinicalTrials.gov](http://www.ClinicalTrials.gov)) will compare three levels of pH for  
112 human embryo culture in vitro on live birth after ICSI (Figure 1). This partially blind design  
113 represents that clinicians, participants and outcome assessor, not including the embryologists,  
114 will be unaware of the study arms. This multicentre trial will involve private IVF facilities in  
115 Egypt (Ibnsina IVF Centre, Egyptian IVF-ET centre, Banon IVF Centre, Qena IVF Centre  
116 and Amshaj IVF Centre) with the study protocol in their hand before enrolment of  
117 participants. If other IVF facilities join this trial before recruitment, this will be reported in  
118 the study.

### 119 **Ethics and dissemination**

120 This trial obtained the approval from Ethics Review Board of Upper Egypt IVF Network  
121 relating to the participating sites (Approval No. 009/2016). An independent safety and  
122 monitoring committee formed of five experts in reproductive endocrinology, reproductive  
123 biology, embryo culture, biostatistics and trial methodology will oversee this trial. All  
124 participants will receive independent counselling from research instructors who are not  
125 involved in patient care or laboratory work. Participants who will accept to participate will  
126 sign a written informed consent before enrolment. Conducting this study will be in  
127 accordance with the Declaration of Helsinki.<sup>16</sup> The trial reporting will be according to the  
128 CONSORT statement,<sup>17</sup> unless other guideline will have higher ranking at that time. No plan  
129 exists to amend this protocol and any amendments will be responsibility for the safety

1  
2  
3 130 committee and will undergo detailed reporting on the trial registry and in the final  
4  
5 131 manuscript.

### 8 132 **Intervention**

9  
10 133 Oocytes and embryos in the three arms will undergo continuous culture from day 0 through  
11  
12 134 day 5 or 6 without medium renewal. “Arm I” is to culture oocytes and resulting embryos after  
13  
14 135 ICSI in pHe of  $7.2\pm 0.02$ . Arm II The “Arm II” is to culture oocytes and resulting embryos  
15  
16 136 after ICSI in pHe of  $7.3\pm 0.02$ . “Arm III” is to culture oocytes and resulting embryos after  
17  
18 137 ICSI in pHe of  $7.4\pm 0.02$ . This trial will include intracytoplasmic sperm injection (ICSI)  
19  
20  
21 138 cycles.

### 24 139 **Patient and Public Involvement**

25  
26 140 No patient involved

### 28 141 **Randomization and Masking**

29  
30 142 Using an online tool, participants will be randomised to the experimental arms with a 1:1:1  
31  
32 143 allocation ratio. The allocation sequence of participants will be generated using a permuted  
33  
34 144 block randomization of 3, 6 and 9 block sizes with unique identifiers in random order,  
35  
36 145 stratified by trial site. Randomization of participants and its storage in sequentially numbered,  
37  
38 146 opaque, sealed envelopes will occur by a secretary with no involvement in patient care and  
39  
40 147 will be provided to trial sites before enrolment of first participant. Eligible participants will  
41  
42 148 be allocated to the relevant arms on the day of maturation trigger and allocation result will be  
43  
44 149 communicated to the laboratory team. Participants, clinicians and outcome assessors for the  
45  
46 150 clinical outcomes will be unaware of the allocation, while embryologists who will assess  
47  
48 151 embryo development will be aware of the allocation.

### 54 152 **Participants**

55  
56 153 The inclusion criteria include:

57  
58 154 1) Women age of  $\geq 18$  to  $\leq 40$ ;

- 1  
2  
3 155 2) BMI of  $\leq 31$ ;  
4  
5 156 3) Anticipated normal responder ( $\geq 5$  antral follicle count or  $\geq 5.4$  pmol/L AMH);  
6  
7 157 4) Women who have  $\geq 1$  year of primary or secondary infertility;  
8  
9 158 5) Fresh ejaculate sperm of any count provided they have  $\geq 1\%$  normal forms and a motile  
10  
11 fraction;  
12 159  
13  
14 160 6) Women undergoing their first ICSI cycle or their second ICSI cycle after previous  
15  
16 successful one;  
17 161  
18 162 7) Women with  $> 7$  mm endometrial thickness at day of trigger;  
19  
20 and 8) Women with no detected uterine abnormality on transvaginal ultrasound (e.g.  
21  
22 submucosal myomas, polyps or septa).  
23 164

24  
25  
26 165 ***Women will be excluded if they have:***

- 27  
28 166 1) Unilateral oophorectomy;  
29  
30 167 2) Abnormal karyotyping for them or their male partners;  
31  
32 168 3) History of repeated abortions or implantation failure;  
33  
34 169 4) Uncontrolled diabetes;  
35  
36 170 5) Liver or renal disease;  
37  
38 171 6) History of severe ovarian hyperstimulation;  
39  
40 172 7) History of malignancy or borderline pathology;  
41  
42 173 8) Endometriosis;  
43  
44 174 9) Plan for PGD-A;  
45  
46 175 10) Severe male factor includes surgical sperm retrieval or cryopreserved sperm;  
47  
48 176 and 11) PCOS, women with history of severe OHSS, and cycles with agonist trigger or any  
49  
50 patient with a plan for a “freeze-all”.  
51  
52  
53  
54 177

55  
56 178 **Stimulation Protocol, Oocyte retrieval, and Luteal Phase Support**  
57  
58  
59  
60

1  
2  
3 179 Women will undergo controlled ovarian stimulation with agonist mid-luteal pituitary down-  
4  
5 180 regulation (Decapeptyl® 0.1mg, Ferring, Switzerland) or antagonist (Cetrotide® 0.25 mg,  
6  
7 181 Merck Serono) protocols. Agonist will start on day 19–21 of the preceding cycle and will  
8  
9 182 continue to the day of maturation trigger. For Antagonist group, women will start the  
10  
11 183 antagonist on day 6 of treatment cycle. All women will receive follicular stimulating  
12  
13 184 hormone (rFSH; Gonal-F, Merck Serono) and human menopausal gonadotropin (HMG;  
14  
15 185 Menogon, Ferring) at 150-300 IU with a 2:1 ratio from cycle day 2 through follicular  
16  
17 186 maturation, with adjustment of the dosage according to the response. When  $\geq 3$  follicles  
18  
19 187 measure  $\geq 18$  mm mean diameter on ultrasound, women will receive a 10,000 IU hCG trigger  
20  
21 188 shot (Choriomon, IBSA) for final oocyte maturation. Oocyte retrieval will be performed 37  
22  
23 189 hours after hCG trigger under transvaginal sonographic guidance. Follicular aspirates will be  
24  
25 190 handled in HEPES-buffered medium (global® HEPES, LifeGlobal, Canada) at 37°C using  
26  
27 191 tube warmers. Luteal-phase support will be achieved with intramuscular progesterone (100  
28  
29 192 mg/mL [Prontogest, IBSA]) once daily or vaginal pessaries (400 mg prontogest) twice daily,  
30  
31 193 starting on day 1 after retrieval (“day 1”) to 12 weeks of gestation, unless negative  
32  
33 194 pregnancy.

#### 34 195 **Sperm Preparation, Oocyte Denudation and ICSI**

35 196 Semen samples will be processed through density gradient,<sup>18</sup> using Puresperm (Nidacon,  
36  
37 197 Sweden). The pellet will undergo once washing and incubation at room temperature in  
38  
39 198 HEPES buffered medium (AllGrade Wash, LifeGlobal). Denudation of oocytes will occur  
40  
41 199 immediately after collection using 40 IU hyaluronidase (LifeGlobal, Canada) diluted in  
42  
43 200 Global HEPES and a stripper of 170 micrometre (Cook, US). Metaphase II (MII) oocytes  
44  
45 201 will undergo ICSI in Global HEPES medium under inverted microscope as previously  
46  
47 202 described.<sup>19</sup>

48 203

## 204 **Incubator Management and pH Adjustment**

205 Incubators for this study involve Labo C-Top (Labotect, Germany), Minc 1000 (Cook, US),  
206 and AD-3100 (Astec, Japan). Each centre will use no more than a brand of incubator to  
207 account for incubator as variable. If another brand of incubators will be used, we will ensure  
208 they are humidified. Dry incubators such as ESCO (Esco Micro Pte. Ltd, Singapore) may be  
209 used at some centres; however, we will adjust the analysis by trial site to account for  
210 differences between centres. Incubators will undergo stringent control of temperature  
211 ( $36.9\pm 0.1^{\circ}\text{C}$ ). The temperature will be validated daily using a certified thermometer.  
212 Incubator's  $\text{CO}_2$  and  $\text{O}_2$  will be measured daily using a certified gas analyser to ensure 5%  $\text{O}_2$   
213 and a proper  $\text{CO}_2$  concentration to achieve the required pH. All the three measurements  
214 (temperature,  $\text{CO}_2$  level, and pH levels) will be verified by well-trained person traveling  
215 across the sites. Incubators will undergo sterilization with 6%  $\text{H}_2\text{O}_2$  every four weeks, with  
216 installation of inline filters (Green, Lifeglobal, CooperSurgical).<sup>20</sup>  
217 A minimum of 3 incubators of a single brand within each participating facility with different  
218 levels of pH representing the study arms is obligatory: Incubator A of  $7.2\pm 0.02$  pH, Incubator  
219 B of  $7.3\pm 0.02$  pH, and Incubator C of  $7.4\pm 0.02$ . The three incubators will undergo a strict  
220 adjustment of the required pH using a handheld blood gas analyser (Epoc® Reader and Host;  
221 BGEM card US). Constant pH levels will be ensured with twice weekly measurement of pH  
222 with blood gas analyser and a daily measurement of  $\text{CO}_2$  level of incubators. Measurement of  
223 pH will occur after an overnight incubation of 1mL culture media in a central well dish  
224 covered with 0.4mL of oil. In the morning and before opening of incubators, the handheld  
225 blood gas analyser (Epoc® Reader and Host; BGEM card US) will undergo preparation for  
226 measuring pH as per the manufacturer protocol. Briefly, after switching on the device,  
227 calibration of the device automatically occurs. Next, we adjust the temperature to  $37^{\circ}\text{C}$ , and  
228 select the sample as arterial. Next, we insert the card, which undergoes automatic calibration.



1  
2  
3 229 Next, when the device is ready, it asks to inject sample. Next, using 1mL syringe attached to  
4  
5 230 wide needle calibre, we aspirate 0.5mL of the culture medium under oil. Next, we discard the  
6  
7 231 first droplet and smoothly inject the sample until the beep. We can see the results of pH,  
8  
9 232 partial CO<sub>2</sub> and O<sub>2</sub> pressures thereafter. Each laboratory will report the results to also  
10  
11 233 compare the resulting partial pressures of CO<sub>2</sub> and O<sub>2</sub> with the incubator display. pH levels  
12  
13 234 will also be measured every new batch of a culture medium. The measurement of pH and  
14  
15 235 CO<sub>2</sub> across the centres will be performed using a one-brand equipment that will undergo  
16  
17 236 periodic calibration together. To account for errors in measurement, one well-trained  
18  
19 237 personnel will be assigned to measure the pH and double check the CO<sub>2</sub> level across the  
20  
21 238 centres.  
22  
23  
24

### 25 26 239 **Culture Protocol and Embryo Scoring**

27  
28 240 Each culture dish (micro-droplet, Vitrolife) will hold 12 droplets of 20 µl each from Global  
29  
30 241 Total culture medium (Lifeglobal, CooperSurgical, US) overlaid with 5 ml of oil (NidOil,  
31  
32 242 Nidacon). If a decision to change culture media at any time point of the study conduct is  
33  
34 243 made, this will be performed at the same time across the study sites. Dishes will undergo  
35  
36 244 overnight incubation in the relevant incubator adjusted to the relevant pH as per the  
37  
38 245 randomization. After ICSI, the injected oocytes will undergo washing in culture medium  
39  
40 246 followed by incubation from day 0 through day 5 or 6 in the relevant arm of pH, except for a  
41  
42 247 small portion of embryos transferred on day 3. The inseminated oocytes will undergo culture  
43  
44 248 in groups of 3 each from days 0 to 5/6, with removal of the unfertilized, abnormally fertilized  
45  
46 249 or degenerated oocytes at fertilization check. Two embryologists will perform the  
47  
48 250 fertilization check and embryo grading on day 1, 2 and 3 of culture as per the Istanbul  
49  
50 251 Consensus.<sup>21</sup> All laboratories will vitrify embryos no earlier than day 5. Embryos are suitable  
51  
52 252 for transfer or vitrification on day 5 provided they are graded 311 as per the Istanbul  
53  
54 253 Consensus.<sup>21</sup> Embryos utilized for transfer or cryopreservation will be pictured and recorded  
55  
56  
57  
58  
59  
60



1  
2  
3 254 in the patient file. All the recorded pictures from all centres will undergo blind grading by  
4  
5 255 two independent experienced embryologists.  
6  
7

### 8 256 **Embryo Transfer**

9  
10 257 Women will undergo fresh embryo transfer by replacing one to two embryos on day 5 with  
11  
12 258 those who replaced embryos on day 3 will be reported as per each centre protocol, except for  
13  
14 259 women with reduced uterine cavity or previous preterm birth, they will replace only one  
15  
16 260 embryo. One participating centre will transfer majority of its cases on day 3. This issue will  
17  
18 261 be accounted for by adjusting the analysis by trial site. Embryo transfer will occur under  
19  
20 262 sonographic guidance using Sydney IVF Transfer Set (Cook, US) as per each centre  
21  
22 263 standardized protocol. The rest of the utilizable embryos will undergo vitrification for  
23  
24 264 transfer in subsequent cycles, while we plan to monitor the cumulative live birth resulted  
25  
26 265 from fresh and vitrified-warmed transfer within one year of randomization. Women will test  
27  
28 266 for biochemical pregnancy 14 days after oocyte retrieval with serum hCG level, and will  
29  
30 267 confirm pregnancy at  $\geq$  week 7 of gestation by detection of intrauterine sac with a heartbeat  
31  
32 268 on ultrasound.  
33  
34  
35  
36  
37

### 38 269 **Outcome Measures**

39  
40 270 Each outcome will be calculated including all randomised participants in the arms to which  
41  
42 271 they were allocated, with the exception of implantation rate, which will be interpreted  
43  
44 272 cautiously due to concerns over its validity as a measure of treatment effect, and perinatal  
45  
46 273 outcomes, which by definition are only available in the subset of participants achieving live  
47  
48 274 birth. This study will adopt the COMMIT definitions of outcomes,<sup>22</sup> where appropriate.  
49  
50

#### 51 275 ***Primary outcome***

52  
53 276 Live birth (delivery of one or more viable infants > 20<sup>th</sup> weeks of gestation).  
54  
55

#### 56 277 ***Secondary outcomes***

57  
58 278 1) Biochemical pregnancy (positive  $\beta$ hCG  $\geq$  10 IU/L at 14 days after egg retrieval).  
59  
60

- 279 2) Clinical pregnancy (registered sacs with a heartbeat on ultrasound > 7<sup>th</sup> weeks of  
280 gestation).
- 281 3) Ongoing pregnancy (continued viable pregnancy > 20<sup>th</sup> weeks of gestation).
- 282 4) Miscarriage (loss of a clinical pregnancy  $\leq$  20<sup>th</sup> weeks of gestation).
- 283 5) Term live-birth (i.e. delivery of one or more viable infants  $\geq$ 37 weeks of gestation).
- 284 6) Preterm Birth (delivery of one or more viable infants < 37<sup>th</sup> weeks of gestation).
- 285 7) Very preterm birth (delivery of one or more viable infants < 32<sup>nd</sup> weeks of gestation).
- 286 8) Low birth weight babies (babies with < 2500 gm within 24 hours of delivery)
- 287 9) Congenital malformation (delivery of congenitally malformed babies).
- 288 10) Still Birth (delivery of nonviable babies > 20 weeks of gestation).
- 289 11) Cumulative live birth (registered viable neonates after one fresh plus one vitrified-  
290 warmed within one year of randomization).
- 291 12) Fertilization (presence of 2 pronuclei 17 $\pm$ 1 hr after ICSI).
- 292 13) Embryo cleavage (cleaved embryos per fertilized oocyte).
- 293 14) Top-quality embryo on day 3 (7-8 cells with appropriate-sizes blastomeres and less than  
294 10% fragmentation by volume).
- 295 15) Blastocyst formation on day 5 or 6 (formed blastocysts per fertilized oocyte).
- 296 16) Top-quality blastocyst on day 5 (rounded and dense inner cell mass with many  
297 trophoctodermal cells creating a connected zone and a blastocoel more than 100% by volume;  
298  $\geq$  311 grade per fertilized oocyte).
- 299 17) Cryopreservation (cryopreserved embryos per fertilized oocyte).
- 300 18) Live-birth-implantation rate (live birth per embryo transferred).
- 301 19) Utilized embryos (number of cryopreserved plus transferred embryos per fertilized  
302 oocyte).

1  
2  
3 303 20) Top-quality utilized embryos (number of high-quality embryos transferred plus blastocyst  
4  
5 304 cryopreserved of 311 grade per fertilized oocyte).

## 8 305 **Statistical Analysis**

### 10 306 *Sample size estimation*

12 307 This is a three-arm study looking at pH over a range of 7.2 to 7.4. The hypothesis to be tested  
13  
14 308 is that adjusting the pH value to the edges of this range might result in improvements to the  
15  
16 309 live birth rate, although we remain in equipoise as to whether higher or lower values will be  
17  
18 310 optimal. On the basis of internal data, live birth rates in the region of 25-35% are typical, and  
19  
20 311 our goal is to investigate whether this is associated with varying pH.

23 312 The study has been powered for a global test of the effect of pH, calculated using plausible  
24  
25 313 birth rates in the three groups of 25%, 30%, and 35%. 646 participants per arm yields 98%  
26  
27 314 power in this scenario, using a 5% significance level. This test makes no assumption about  
28  
29 315 the ordering of the live birth rates in relation to the ordering of the pH values. The high power  
30  
31 316 level has been adopted to allow for some leeway in relation to the minimum effect size. For  
32  
33 317 illustration, if the birth rates were slightly less distinct, with 26%, 30%, 33% (a spread of just  
34  
35 318 seven percentage points) this sample size yields 85% power against a 5% significance level,  
36  
37 319 and 65% at a 1% significance level. We have also been conservative in our inflation of  
38  
39 320 numbers for dropout. We have allowed for 5% loss to follow up, inflating our group size to  
40  
41 321 680. In reality, we will conduct analysis on an intention to treat basis, including all  
42  
43 322 randomised women. Women who do not complete treatment (for example, they do not  
44  
45 323 undergo embryo transfer) will be counted as not having a live birth. The only exceptions to  
46  
47 324 this will be participants who withdraw consent for their data to be used in the study. Our  
48  
49 325 inflation for loss to follow up reflects this possibility.

50  
51 326 We also note that adjustment for site and age in the analysis will increase power further.

52  
53  
54  
55  
56  
57  
58 327  
59  
60

1  
2  
3 328 *Analytical methods*  
4

5 329 The study conduct will be according to the intention-to-treat approach, where each participant  
6  
7 330 randomised will be included in the analysis, regardless of protocol deviation. The primary  
8  
9 331 analysis of live birth will be conducted using logistic regression, with live birth event  
10  
11 332 regressed on pH group, adjusted for study site and participant age, which will be standardised  
12  
13 333 before being entered as a covariate. pH will be entered as a categorical covariate, allowing a  
14  
15 334 Likelihood Ratio test of the association between pH and live birth rate across the three groups  
16  
17 335 to be performed. Secondary supportive analyses will be conducted to try to characterise the  
18  
19 336 nature of any association. This will include a test of linear trend in live birth rates across pH  
20  
21 337 groups, which would imply an optimal pH level for the lowest or highest value, as well as  
22  
23 338 pairwise comparisons between each group (again, these analyses will be adjusted for site and  
24  
25 339 age). The pairwise comparisons will focus on size and precision of the odds ratios. Although  
26  
27 340 it would be desirable to power the study for all pairwise comparisons as the primary outcome,  
28  
29 341 this yields impracticable sample sizes (> 4000 participants) against realistic effects. The study  
30  
31 342 has therefore been designed to represent the most informative test of the hypothesis that pH  
32  
33 343 level affects live birth, that is practicable.  
34  
35  
36  
37  
38  
39

40 344  
41  
42 345 For secondary outcomes, binary variables will be analysed in an analogous fashion to the  
43  
44 346 primary analysis. Count variables will be analysed using Poisson regression, with zero-  
45  
46 347 inflated models wherever the outcome is structurally undefined for some participants. Again,  
47  
48 348 these will be adjusted for site and age. In the analysis of number of usable embryos,  
49  
50 349 implanted embryos arising from the day 3 transfer will be included as formed and good  
51  
52 350 quality blastocysts, while those that do not implant in this portion will be considered blocked  
53  
54 351 at day 3. The total of the number of embryos transferred and the formed blastocysts will be  
55  
56 352 used to calculate number of utilizable embryos. A 1% significance level will be employed.  
57  
58  
59  
60

1  
2  
3 353 Due to the short treatment duration, it is anticipated that loss to follow up will be minimal,  
4  
5 354 but if any loss does occur then these participants will be analysed as having negative status  
6  
7  
8 355 for the primary outcome, unless consent to use data is withdrawn. The follow-up period is  
9  
10 356 identified as one year from randomization of the last participant provided that all pregnant  
11  
12 357 women have given birth.

## 14 358 **Discussion**

16  
17 359 Given the lack of evidence for a superior pH level for human embryo culture and whether  
18  
19 360 the pH level could make a difference in live birth after IVF, this trial is performed. This trial  
20  
21 361 is expected to fill the gap in this area leaving the recommendations of manufactures of culture  
22  
23 362 media to a solid base relying on evidence. The trial power is set to be high (>90%, with a 1%  
24  
25 363 significance level) to minimize the risk for uninformative results. In any occasion of  
26  
27 364 cleavage-stage transfer, the calculation of the blastocyst formation will be based on the  
28  
29 365 assumption that embryos that will implant will be calculated as a formed blastocyst, while the  
30  
31 366 failure of implantation of an embryo will be considered as embryo block at the cleavage  
32  
33 367 stage. Although this is not the ideal track to calculate blastocyst formation, we find this  
34  
35 368 assumption is the closest one to reflect the blastocyst formation. This will be further  
36  
37 369 discussed when this trial is reported.

## 41 370 **Funding and conflict of interest**

42  
43 371 The study receives no fund and the authors have no conflict of interest to declare.

## 44 372 **Authors' contributions**

45  
46 373 Mohamed is the creator of the concept and design of the study, and is the principal  
47  
48 374 investigator of the study. Mohamed Fawzy is also a supervisor for the study conduct across  
49  
50 375 the sites and will make sure that data is periodically sent to for storage in independent  
51  
52 376 database. Jack Wilkinson is the statistician of the study who revised the study design and  
53  
54 377 calculated the sample size and power of the study and he will be responsible for the data  
55  
56  
57  
58  
59  
60

1  
2  
3 378 analysis and data transfer to the independent safety and monitoring committee. Mai Emad is a  
4  
5 379 primary investigator at Banon IVF centre and a sub-investigator at Ibsina Centre, and she  
6  
7  
8 380 participated in revising the trial protocol and will participate in trial reporting thereafter.  
9  
10 381 Ragaa Mansour is a primary investigator at the Egyptian IVF-ET Centre, and revised the trial  
11  
12 382 protocol and provided advice during the protocol design. Ali Mahran is the andrologist of the  
13  
14 383 study that will make sure all male partners are in line with the inclusion criteria, and revised  
15  
16 384 the protocol and provided comments. Ahmed Fetih is a primary investigator at Banon IVF  
17  
18 385 Centre and participated revising the protocol and provided comments. Mohamed  
19  
20 386 AbdelRahman participated in the trial design and is a primary investigator at Amshaj IVF  
21  
22 387 Centre. Hazem Abdelghafar is a primary investigator at Ibsina IVF Centre and participated  
23  
24 388 in the trial design. All authors provided comments and agreed on the study design and  
25  
26 389 protocol, and will participate in reporting this trial thereafter.  
27  
28  
29  
30

## 31 390 **References**

- 32  
33 391 1. Smith A, Tilling K, Nelson SM, et al. Live-Birth Rate Associated With Repeat In Vitro  
34 392 Fertilization Treatment Cycles. *JAMA* 2015;314(24):2654-62. doi:  
35 393 10.1001/jama.2015.17296 [published Online First: 2015/12/31]  
36 394 2. Berntsen S, Söderström-Anttila V, Wennerholm U-B, et al. The health of children  
37 395 conceived by ART: 'the chicken or the egg?'. *Human Reproduction Update*  
38 396 2019;25(2):137-58. doi: 10.1093/humupd/dmz001  
39 397 3. Pool TB, Schoolfield J, Han D. Human embryo culture media comparisons. *Methods Mol*  
40 398 *Biol* 2012;912:367-86. doi: 10.1007/978-1-61779-971-6\_21 [published Online First:  
41 399 2012/07/26]  
42 400 4. Swain JE. Is there an optimal pH for culture media used in clinical IVF? *Hum Reprod*  
43 401 *Update* 2012;18(3):333-9. doi: 10.1093/humupd/dmr053 [published Online First:  
44 402 2012/02/09]  
45 403 5. Tarahomi M, de Melker AA, van Wely M, et al. pH stability of human preimplantation  
46 404 embryo culture media: effects of culture and batches. *Reprod Biomed Online*  
47 405 2018;37(4):409-14. doi: 10.1016/j.rbmo.2018.08.011 [published Online First:  
48 406 2018/09/20]  
49 407 6. Shalgi R, Kraicer PF, Soferman N. Gases and electrolytes of human follicular fluid. *J*  
50 408 *Reprod Fertil* 1972;28(3):335-40. [published Online First: 1972/03/01]  
51 409 7. Phillips KP, Leveille MC, Claman P, et al. Intracellular pH regulation in human  
52 410 preimplantation embryos. *Hum Reprod* 2000;15(4):896-904. doi:  
53 411 10.1093/humrep/15.4.896 [published Online First: 2000/03/31]  
54 412 8. FitzHarris G, Siyanov V, Baltz JM. Granulosa cells regulate oocyte intracellular pH  
55 413 against acidosis in preantral follicles by multiple mechanisms. *Development*  
56 414 2007;134(23):4283-95. doi: 10.1242/dev.005272 [published Online First: 2007/11/06]



- 1  
2  
3 415 9. Dale B, Menezo Y, Cohen J, et al. Intracellular pH regulation in the human oocyte. *Hum*  
4 416 *Reprod* 1998;13(4):964-70. doi: 10.1093/humrep/13.4.964 [published Online First:  
5 417 1998/06/10]
- 6 418 10. Lane M, Baltz JM, Bavister BD. Na<sup>+</sup>/H<sup>+</sup> antiporter activity in hamster embryos is  
7 419 activated during fertilization. *Dev Biol* 1999;208(1):244-52. doi:  
8 420 10.1006/dbio.1999.9198 [published Online First: 1999/03/17]
- 9 421 11. Swain JE, Pool TB. New pH-buffering system for media utilized during gamete and  
10 422 embryo manipulations for assisted reproduction. *Reprod Biomed Online*  
11 423 2009;18(6):799-810. [published Online First: 2009/06/06]
- 12 424 12. Hentemann M, Mousavi K, Bertheussen K. Differential pH in embryo culture. *Fertil*  
13 425 *Steril* 2011;95(4):1291-4. doi: 10.1016/j.fertnstert.2010.10.018 [published Online  
14 426 First: 2010/11/12]
- 15 427 13. Carney EW, Bavister BD. Regulation of hamster embryo development in vitro by carbon  
16 428 dioxide. *Biol Reprod* 1987;36(5):1155-63. doi: 10.1095/biolreprod36.5.1155  
17 429 [published Online First: 1987/06/01]
- 18 430 14. Edwards LJ, Williams DA, Gardner DK. Intracellular pH of the mouse preimplantation  
19 431 embryo: amino acids act as buffers of intracellular pH. *Hum Reprod*  
20 432 1998;13(12):3441-8. doi: 10.1093/humrep/13.12.3441 [published Online First:  
21 433 1999/01/14]
- 22 434 15. Edwards LJ, Williams DA, Gardner DK. Intracellular pH of the preimplantation mouse  
23 435 embryo: effects of extracellular pH and weak acids. *Mol Reprod Dev* 1998;50(4):434-  
24 436 42. doi: 10.1002/(SICI)1098-2795(199808)50:4<434::AID-MRD7>3.0.CO;2-J  
25 437 [published Online First: 1998/07/21]
- 26 438 16. Williams JR. The Declaration of Helsinki and public health. *Bull World Health Organ*  
27 439 2008;86(8):650-2. doi: 10.2471/blt.08.050955 [published Online First: 2008/09/18]
- 28 440 17. Schulz KF, Altman DG, Moher D, et al. CONSORT 2010 statement: updated guidelines  
29 441 for reporting parallel group randomised trials. *BMJ* 2010;340:c332. doi:  
30 442 10.1136/bmj.c332 [published Online First: 2010/03/25]
- 31 443 18. World Health Organization. WHO laboratory manual for the examination and processing  
32 444 of human semen. 5th ed. Geneva: World Health Organization 2010.
- 33 445 19. Palermo G, Joris H, Devroey P, et al. Pregnancies after intracytoplasmic injection of  
34 446 single spermatozoon into an oocyte. *Lancet* 1992;340(8810):17-8. doi: 10.1016/0140-  
35 447 6736(92)92425-f [published Online First: 1992/07/04]
- 36 448 20. Mortimer D, Cohen J, Mortimer ST, et al. Cairo consensus on the IVF laboratory  
37 449 environment and air quality: report of an expert meeting. *Reprod Biomed Online*  
38 450 2018;36(6):658-74. doi: 10.1016/j.rbmo.2018.02.005 [published Online First:  
39 451 2018/04/17]
- 40 452 21. Medicine ASIR, Embryology ESIG. Istanbul consensus workshop on embryo assessment:  
41 453 proceedings of an expert meeting. *Reprod Biomed Online* 2011;22(6):632-46. doi:  
42 454 10.1016/j.rbmo.2011.02.001 [published Online First: 2011/04/13]
- 43 455 22. Duffy JMN, Bhattacharya S, Curtis C, et al. A protocol developing, disseminating and  
44 456 implementing a core outcome set for infertility. *Hum Reprod Open*  
45 457 2018;2018(3):hoy007. doi: 10.1093/hropen/hoy007 [published Online First:  
46 458 2019/03/22]
- 47 459
- 48 460
- 49
- 50
- 51
- 52
- 53
- 54
- 55
- 56 460 Figure Legend: Trial plan for enrolment
- 57
- 58
- 59
- 60

1  
2  
3  
4  
5  
6  
7  
8  
9  
10  
11  
12  
13  
14  
15  
16  
17  
18  
19  
20  
21  
22  
23  
24  
25  
26  
27  
28  
29  
30  
31  
32  
33  
34  
35  
36  
37  
38  
39  
40  
41  
42  
43  
44  
45  
46  
47  
48  
49  
50  
51  
52  
53  
54  
55  
56  
57  
58  
59  
60

Couples will receive detailed information on the possible risks and potential benefits.

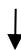

Couples with primary acceptance will be randomized to the three pH arms of the study

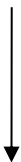

Randomization will occur to assign ~ 2100 participants to undergo day-5 fresh embryo-transfer utilizing the blastocysts developed in the either 7.2, 7.3 or 7.4 pH levels.

**Women randomization**

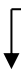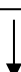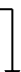

~ 700 participants will be randomized to undergo embryo culture in 7.2 pH level for 5 to 6 days and will receive fresh embryo transfer from this arm.

~ 700 participants will be randomized to undergo embryo culture in 7.3 pH level for 5 to 6 days and will receive fresh embryo transfer from this arm.

~ 700 participants will be randomized to undergo embryo culture in 7.4 pH level for 5 to 6 days and will receive fresh embryo transfer from this arm.

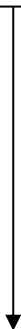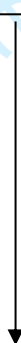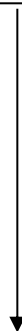

The intention-to-treat will include all randomized participants to 7.2 pH level group with the live birth rate as primary endpoint.

The intention-to-treat will include all randomized participants to 7.3 pH level group with the live birth rate as primary endpoint.

The intention-to-treat will include all randomized participants to 7.4 pH level group with the live birth rate as primary endpoint.

**pH trial plan for enrollment and outcomes – 7.2, 7.3 and 7.4 pH levels**



# Reporting checklist for protocol of a clinical trial.

Based on the SPIRIT guidelines.

## Instructions to authors

Complete this checklist by entering the page numbers from your manuscript where readers will find each of the items listed below.

Your article may not currently address all the items on the checklist. Please modify your text to include the missing information. If you are certain that an item does not apply, please write "n/a" and provide a short explanation.

Upload your completed checklist as an extra file when you submit to a journal.

In your methods section, say that you used the SPIRIT reporting guidelines, and cite them as:

Chan A-W, Tetzlaff JM, Altman DG, Laupacis A, Gøtzsche PC, Krleža-Jerić K, Hróbjartsson A, Mann H, Dickersin K, Berlin J, Doré C, Parulekar W, Summerskill W, Groves T, Schulz K, Sox H, Rockhold FW, Rennie D, Moher D. SPIRIT 2013 Statement: Defining standard protocol items for clinical trials. *Ann Intern Med.* 2013;158(3):200-207

|                                             |                     | Reporting Item                                                                                               | Page Number |
|---------------------------------------------|---------------------|--------------------------------------------------------------------------------------------------------------|-------------|
| <b>Administrative information</b>           |                     |                                                                                                              |             |
| Title                                       | <a href="#">#1</a>  | Descriptive title identifying the study design, population, interventions, and, if applicable, trial acronym | 1           |
| Trial registration                          | <a href="#">#2a</a> | Trial identifier and registry name. If not yet registered, name of intended registry                         | 2           |
| Trial registration: data set                | <a href="#">#2b</a> | All items from the World Health Organization Trial Registration Data Set                                     | 4           |
| Protocol version                            | <a href="#">#3</a>  | Date and version identifier                                                                                  | 4           |
| Funding                                     | <a href="#">#4</a>  | Sources and types of financial, material, and other support                                                  | 13          |
| Roles and responsibilities: contributorship | <a href="#">#5a</a> | Names, affiliations, and roles of protocol contributors                                                      | 1           |

|    |                           |                     |                                                                    |       |
|----|---------------------------|---------------------|--------------------------------------------------------------------|-------|
| 1  | Roles and                 | <a href="#">#5b</a> | Name and contact information for the trial sponsor                 | 1     |
| 2  | responsibilities:         |                     |                                                                    |       |
| 3  | sponsor contact           |                     |                                                                    |       |
| 4  | information               |                     |                                                                    |       |
| 5  |                           |                     |                                                                    |       |
| 6  |                           |                     |                                                                    |       |
| 7  |                           |                     |                                                                    |       |
| 8  | Roles and                 | <a href="#">#5c</a> | Role of study sponsor and funders, if any, in study design;        | 13    |
| 9  | responsibilities:         |                     | collection, management, analysis, and interpretation of data;      |       |
| 10 | sponsor and funder        |                     | writing of the report; and the decision to submit the report for   |       |
| 11 |                           |                     | publication, including whether they will have ultimate authority   |       |
| 12 |                           |                     | over any of these activities                                       |       |
| 13 |                           |                     |                                                                    |       |
| 14 |                           |                     |                                                                    |       |
| 15 |                           |                     |                                                                    |       |
| 16 | Roles and                 | <a href="#">#5d</a> | Composition, roles, and responsibilities of the coordinating       | 4     |
| 17 | responsibilities:         |                     | centre, steering committee, endpoint adjudication committee,       |       |
| 18 | committees                |                     | data management team, and other individuals or groups              |       |
| 19 |                           |                     | overseeing the trial, if applicable (see Item 21a for data         |       |
| 20 |                           |                     | monitoring committee)                                              |       |
| 21 |                           |                     |                                                                    |       |
| 22 |                           |                     |                                                                    |       |
| 23 |                           |                     |                                                                    |       |
| 24 | <b>Introduction</b>       |                     |                                                                    |       |
| 25 |                           |                     |                                                                    |       |
| 26 |                           |                     |                                                                    |       |
| 27 | Background and            | <a href="#">#6a</a> | Description of research question and justification for undertaking | 2 & 3 |
| 28 | rationale                 |                     | the trial, including summary of relevant studies (published and    |       |
| 29 |                           |                     | unpublished) examining benefits and harms for each intervention    |       |
| 30 |                           |                     |                                                                    |       |
| 31 |                           |                     |                                                                    |       |
| 32 | Background and            | <a href="#">#6b</a> | Explanation for choice of comparators                              | 2 & 3 |
| 33 | rationale: choice of      |                     |                                                                    |       |
| 34 | comparators               |                     |                                                                    |       |
| 35 |                           |                     |                                                                    |       |
| 36 |                           |                     |                                                                    |       |
| 37 | Objectives                | <a href="#">#7</a>  | Specific objectives or hypotheses                                  | 3 & 4 |
| 38 |                           |                     |                                                                    |       |
| 39 |                           |                     |                                                                    |       |
| 40 | Trial design              | <a href="#">#8</a>  | Description of trial design including type of trial (eg, parallel  | 4     |
| 41 |                           |                     | group, crossover, factorial, single group), allocation ratio, and  |       |
| 42 |                           |                     | framework (eg, superiority, equivalence, non-inferiority,          |       |
| 43 |                           |                     | exploratory)                                                       |       |
| 44 |                           |                     |                                                                    |       |
| 45 |                           |                     |                                                                    |       |
| 46 | <b>Methods:</b>           |                     |                                                                    |       |
| 47 | <b>Participants,</b>      |                     |                                                                    |       |
| 48 | <b>interventions, and</b> |                     |                                                                    |       |
| 49 | <b>outcomes</b>           |                     |                                                                    |       |
| 50 |                           |                     |                                                                    |       |
| 51 |                           |                     |                                                                    |       |
| 52 |                           |                     |                                                                    |       |
| 53 | Study setting             | <a href="#">#9</a>  | Description of study settings (eg, community clinic, academic      | 4     |
| 54 |                           |                     | hospital) and list of countries where data will be collected.      |       |
| 55 |                           |                     | Reference to where list of study sites can be obtained             |       |
| 56 |                           |                     |                                                                    |       |
| 57 |                           |                     |                                                                    |       |
| 58 |                           |                     |                                                                    |       |
| 59 |                           |                     |                                                                    |       |
| 60 |                           |                     |                                                                    |       |

|    |                              |                      |                                                                                                                                                                                                                                                                                                                                                                                |         |
|----|------------------------------|----------------------|--------------------------------------------------------------------------------------------------------------------------------------------------------------------------------------------------------------------------------------------------------------------------------------------------------------------------------------------------------------------------------|---------|
| 1  | Eligibility criteria         | <a href="#">#10</a>  | Inclusion and exclusion criteria for participants. If applicable, eligibility criteria for study centres and individuals who will perform the interventions (eg, surgeons, psychotherapists)                                                                                                                                                                                   | 5 & 6   |
| 2  |                              |                      |                                                                                                                                                                                                                                                                                                                                                                                |         |
| 3  |                              |                      |                                                                                                                                                                                                                                                                                                                                                                                |         |
| 4  |                              |                      |                                                                                                                                                                                                                                                                                                                                                                                |         |
| 5  |                              |                      |                                                                                                                                                                                                                                                                                                                                                                                |         |
| 6  | Interventions:               | <a href="#">#11a</a> | Interventions for each group with sufficient detail to allow replication, including how and when they will be administered                                                                                                                                                                                                                                                     | 4 & 5   |
| 7  | description                  |                      |                                                                                                                                                                                                                                                                                                                                                                                |         |
| 8  |                              |                      |                                                                                                                                                                                                                                                                                                                                                                                |         |
| 9  |                              |                      |                                                                                                                                                                                                                                                                                                                                                                                |         |
| 10 | Interventions:               | <a href="#">#11b</a> | Criteria for discontinuing or modifying allocated interventions for a given trial participant (eg, drug dose change in response to harms, participant request, or improving / worsening disease)                                                                                                                                                                               | 4 & 5   |
| 11 | modifications                |                      |                                                                                                                                                                                                                                                                                                                                                                                |         |
| 12 |                              |                      |                                                                                                                                                                                                                                                                                                                                                                                |         |
| 13 |                              |                      |                                                                                                                                                                                                                                                                                                                                                                                |         |
| 14 |                              |                      |                                                                                                                                                                                                                                                                                                                                                                                |         |
| 15 | Interventions:               | <a href="#">#11c</a> | Strategies to improve adherence to intervention protocols, and any procedures for monitoring adherence (eg, drug tablet return; laboratory tests)                                                                                                                                                                                                                              | 4 & 5   |
| 16 | adherence                    |                      |                                                                                                                                                                                                                                                                                                                                                                                |         |
| 17 |                              |                      |                                                                                                                                                                                                                                                                                                                                                                                |         |
| 18 |                              |                      |                                                                                                                                                                                                                                                                                                                                                                                |         |
| 19 |                              |                      |                                                                                                                                                                                                                                                                                                                                                                                |         |
| 20 |                              |                      |                                                                                                                                                                                                                                                                                                                                                                                |         |
| 21 | Interventions:               | <a href="#">#11d</a> | Relevant concomitant care and interventions that are permitted or prohibited during the trial                                                                                                                                                                                                                                                                                  | 9       |
| 22 | concomitant care             |                      |                                                                                                                                                                                                                                                                                                                                                                                |         |
| 23 |                              |                      |                                                                                                                                                                                                                                                                                                                                                                                |         |
| 24 |                              |                      |                                                                                                                                                                                                                                                                                                                                                                                |         |
| 25 | Outcomes                     | <a href="#">#12</a>  | Primary, secondary, and other outcomes, including the specific measurement variable (eg, systolic blood pressure), analysis metric (eg, change from baseline, final value, time to event), method of aggregation (eg, median, proportion), and time point for each outcome. Explanation of the clinical relevance of chosen efficacy and harm outcomes is strongly recommended | 10 & 11 |
| 26 |                              |                      |                                                                                                                                                                                                                                                                                                                                                                                |         |
| 27 |                              |                      |                                                                                                                                                                                                                                                                                                                                                                                |         |
| 28 |                              |                      |                                                                                                                                                                                                                                                                                                                                                                                |         |
| 29 |                              |                      |                                                                                                                                                                                                                                                                                                                                                                                |         |
| 30 |                              |                      |                                                                                                                                                                                                                                                                                                                                                                                |         |
| 31 |                              |                      |                                                                                                                                                                                                                                                                                                                                                                                |         |
| 32 |                              |                      |                                                                                                                                                                                                                                                                                                                                                                                |         |
| 33 |                              |                      |                                                                                                                                                                                                                                                                                                                                                                                |         |
| 34 | Participant timeline         | <a href="#">#13</a>  | Time schedule of enrolment, interventions (including any run-ins and washouts), assessments, and visits for participants. A schematic diagram is highly recommended (see Figure)                                                                                                                                                                                               | 8       |
| 35 |                              |                      |                                                                                                                                                                                                                                                                                                                                                                                |         |
| 36 |                              |                      |                                                                                                                                                                                                                                                                                                                                                                                |         |
| 37 |                              |                      |                                                                                                                                                                                                                                                                                                                                                                                |         |
| 38 |                              |                      |                                                                                                                                                                                                                                                                                                                                                                                |         |
| 39 |                              |                      |                                                                                                                                                                                                                                                                                                                                                                                |         |
| 40 | Sample size                  | <a href="#">#14</a>  | Estimated number of participants needed to achieve study objectives and how it was determined, including clinical and statistical assumptions supporting any sample size calculations                                                                                                                                                                                          | 11 & 12 |
| 41 |                              |                      |                                                                                                                                                                                                                                                                                                                                                                                |         |
| 42 |                              |                      |                                                                                                                                                                                                                                                                                                                                                                                |         |
| 43 |                              |                      |                                                                                                                                                                                                                                                                                                                                                                                |         |
| 44 |                              |                      |                                                                                                                                                                                                                                                                                                                                                                                |         |
| 45 | Recruitment                  | <a href="#">#15</a>  | Strategies for achieving adequate participant enrolment to reach target sample size                                                                                                                                                                                                                                                                                            | 4       |
| 46 |                              |                      |                                                                                                                                                                                                                                                                                                                                                                                |         |
| 47 |                              |                      |                                                                                                                                                                                                                                                                                                                                                                                |         |
| 48 |                              |                      |                                                                                                                                                                                                                                                                                                                                                                                |         |
| 49 | <b>Methods: Assignment</b>   |                      |                                                                                                                                                                                                                                                                                                                                                                                |         |
| 50 | <b>of interventions (for</b> |                      |                                                                                                                                                                                                                                                                                                                                                                                |         |
| 51 | <b>controlled trials)</b>    |                      |                                                                                                                                                                                                                                                                                                                                                                                |         |
| 52 |                              |                      |                                                                                                                                                                                                                                                                                                                                                                                |         |
| 53 |                              |                      |                                                                                                                                                                                                                                                                                                                                                                                |         |
| 54 | Allocation: sequence         | <a href="#">#16a</a> | Method of generating the allocation sequence (eg, computer-generated random numbers), and list of any factors for stratification. To reduce predictability of a random sequence, details of any planned restriction (eg, blocking) should be                                                                                                                                   | 5       |
| 55 | generation                   |                      |                                                                                                                                                                                                                                                                                                                                                                                |         |
| 56 |                              |                      |                                                                                                                                                                                                                                                                                                                                                                                |         |
| 57 |                              |                      |                                                                                                                                                                                                                                                                                                                                                                                |         |
| 58 |                              |                      |                                                                                                                                                                                                                                                                                                                                                                                |         |
| 59 |                              |                      |                                                                                                                                                                                                                                                                                                                                                                                |         |
| 60 |                              |                      |                                                                                                                                                                                                                                                                                                                                                                                |         |

provided in a separate document that is unavailable to those who enrol participants or assign interventions

|    |                        |                      |                                                                     |         |
|----|------------------------|----------------------|---------------------------------------------------------------------|---------|
| 1  |                        |                      |                                                                     |         |
| 2  |                        |                      |                                                                     |         |
| 3  |                        |                      |                                                                     |         |
| 4  | Allocation             | <a href="#">#16b</a> | Mechanism of implementing the allocation sequence (eg, central      | 5       |
| 5  | concealment            |                      | telephone; sequentially numbered, opaque, sealed envelopes),        |         |
| 6  |                        |                      | describing any steps to conceal the sequence until interventions    |         |
| 7  | mechanism              |                      | are assigned                                                        |         |
| 8  |                        |                      |                                                                     |         |
| 9  |                        |                      |                                                                     |         |
| 10 |                        |                      |                                                                     |         |
| 11 | Allocation:            | <a href="#">#16c</a> | Who will generate the allocation sequence, who will enrol           | 5       |
| 12 | implementation         |                      | participants, and who will assign participants to interventions     |         |
| 13 |                        |                      |                                                                     |         |
| 14 | Blinding (masking)     | <a href="#">#17a</a> | Who will be blinded after assignment to interventions (eg, trial    | 5       |
| 15 |                        |                      | participants, care providers, outcome assessors, data analysts),    |         |
| 16 |                        |                      | and how                                                             |         |
| 17 |                        |                      |                                                                     |         |
| 18 |                        |                      |                                                                     |         |
| 19 |                        |                      |                                                                     |         |
| 20 | Blinding (masking):    | <a href="#">#17b</a> | If blinded, circumstances under which unblinding is permissible,    | 5       |
| 21 | emergency unblinding   |                      | and procedure for revealing a participant's allocated intervention  |         |
| 22 |                        |                      | during the trial                                                    |         |
| 23 |                        |                      |                                                                     |         |
| 24 |                        |                      |                                                                     |         |
| 25 | <b>Methods: Data</b>   |                      |                                                                     |         |
| 26 | <b>collection,</b>     |                      |                                                                     |         |
| 27 | <b>management, and</b> |                      |                                                                     |         |
| 28 | <b>analysis</b>        |                      |                                                                     |         |
| 29 |                        |                      |                                                                     |         |
| 30 |                        |                      |                                                                     |         |
| 31 |                        |                      |                                                                     |         |
| 32 | Data collection plan   | <a href="#">#18a</a> | Plans for assessment and collection of outcome, baseline, and       | 11      |
| 33 |                        |                      | other trial data, including any related processes to promote data   |         |
| 34 |                        |                      | quality (eg, duplicate measurements, training of assessors) and a   |         |
| 35 |                        |                      | description of study instruments (eg, questionnaires, laboratory    |         |
| 36 |                        |                      | tests) along with their reliability and validity, if known.         |         |
| 37 |                        |                      | Reference to where data collection forms can be found, if not in    |         |
| 38 |                        |                      | the protocol                                                        |         |
| 39 |                        |                      |                                                                     |         |
| 40 |                        |                      |                                                                     |         |
| 41 |                        |                      |                                                                     |         |
| 42 |                        |                      |                                                                     |         |
| 43 | Data collection plan:  | <a href="#">#18b</a> | Plans to promote participant retention and complete follow-up,      | 11      |
| 44 | retention              |                      | including list of any outcome data to be collected for participants |         |
| 45 |                        |                      | who discontinue or deviate from intervention protocols              |         |
| 46 |                        |                      |                                                                     |         |
| 47 |                        |                      |                                                                     |         |
| 48 | Data management        | <a href="#">#19</a>  | Plans for data entry, coding, security, and storage, including any  | 11      |
| 49 |                        |                      | related processes to promote data quality (eg, double data entry;   |         |
| 50 |                        |                      | range checks for data values). Reference to where details of data   |         |
| 51 |                        |                      | management procedures can be found, if not in the protocol          |         |
| 52 |                        |                      |                                                                     |         |
| 53 |                        |                      |                                                                     |         |
| 54 |                        |                      |                                                                     |         |
| 55 | Statistics: outcomes   | <a href="#">#20a</a> | Statistical methods for analysing primary and secondary             | 11 & 12 |
| 56 |                        |                      | outcomes. Reference to where other details of the statistical       |         |
| 57 |                        |                      | analysis plan can be found, if not in the protocol                  |         |
| 58 |                        |                      |                                                                     |         |
| 59 |                        |                      |                                                                     |         |
| 60 |                        |                      |                                                                     |         |

|    |                            |                      |                                                                    |         |
|----|----------------------------|----------------------|--------------------------------------------------------------------|---------|
| 1  | Statistics: additional     | <a href="#">#20b</a> | Methods for any additional analyses (eg, subgroup and adjusted     | 11 & 12 |
| 2  | analyses                   |                      | analyses)                                                          |         |
| 3  |                            |                      |                                                                    |         |
| 4  | Statistics: analysis       | <a href="#">#20c</a> | Definition of analysis population relating to protocol non-        | 11 & 12 |
| 5  | population and missing     |                      | adherence (eg, as randomised analysis), and any statistical        |         |
| 6  | data                       |                      | methods to handle missing data (eg, multiple imputation)           |         |
| 7  |                            |                      |                                                                    |         |
| 8  |                            |                      |                                                                    |         |
| 9  |                            |                      |                                                                    |         |
| 10 | <b>Methods: Monitoring</b> |                      |                                                                    |         |
| 11 |                            |                      |                                                                    |         |
| 12 | Data monitoring:           | <a href="#">#21a</a> | Composition of data monitoring committee (DMC); summary of         | 4       |
| 13 | formal committee           |                      | its role and reporting structure; statement of whether it is       |         |
| 14 |                            |                      | independent from the sponsor and competing interests; and          |         |
| 15 |                            |                      | reference to where further details about its charter can be found, |         |
| 16 |                            |                      | if not in the protocol. Alternatively, an explanation of why a     |         |
| 17 |                            |                      | DMC is not needed                                                  |         |
| 18 |                            |                      |                                                                    |         |
| 19 |                            |                      |                                                                    |         |
| 20 |                            |                      |                                                                    |         |
| 21 |                            |                      |                                                                    |         |
| 22 | Data monitoring:           | <a href="#">#21b</a> | Description of any interim analyses and stopping guidelines,       | 4, 11 & |
| 23 | interim analysis           |                      | including who will have access to these interim results and make   | 12      |
| 24 |                            |                      | the final decision to terminate the trial                          |         |
| 25 |                            |                      |                                                                    |         |
| 26 |                            |                      |                                                                    |         |
| 27 | Harms                      | <a href="#">#22</a>  | Plans for collecting, assessing, reporting, and managing solicited | 4       |
| 28 |                            |                      | and spontaneously reported adverse events and other unintended     |         |
| 29 |                            |                      | effects of trial interventions or trial conduct                    |         |
| 30 |                            |                      |                                                                    |         |
| 31 |                            |                      |                                                                    |         |
| 32 |                            |                      |                                                                    |         |
| 33 | Auditing                   | <a href="#">#23</a>  | Frequency and procedures for auditing trial conduct, if any, and   | 4       |
| 34 |                            |                      | whether the process will be independent from investigators and     |         |
| 35 |                            |                      | the sponsor                                                        |         |
| 36 |                            |                      |                                                                    |         |
| 37 |                            |                      |                                                                    |         |
| 38 | <b>Ethics and</b>          |                      |                                                                    |         |
| 39 | <b>dissemination</b>       |                      |                                                                    |         |
| 40 |                            |                      |                                                                    |         |
| 41 |                            |                      |                                                                    |         |
| 42 | Research ethics            | <a href="#">#24</a>  | Plans for seeking research ethics committee / institutional review | 4       |
| 43 | approval                   |                      | board (REC / IRB) approval                                         |         |
| 44 |                            |                      |                                                                    |         |
| 45 |                            |                      |                                                                    |         |
| 46 | Protocol amendments        | <a href="#">#25</a>  | Plans for communicating important protocol modifications (eg,      | 4       |
| 47 |                            |                      | changes to eligibility criteria, outcomes, analyses) to relevant   |         |
| 48 |                            |                      | parties (eg, investigators, REC / IRBs, trial participants, trial  |         |
| 49 |                            |                      | registries, journals, regulators)                                  |         |
| 50 |                            |                      |                                                                    |         |
| 51 |                            |                      |                                                                    |         |
| 52 |                            |                      |                                                                    |         |
| 53 | Consent or assent          | <a href="#">#26a</a> | Who will obtain informed consent or assent from potential trial    | 4       |
| 54 |                            |                      | participants or authorised surrogates, and how (see Item 32)       |         |
| 55 |                            |                      |                                                                    |         |
| 56 |                            |                      |                                                                    |         |
| 57 |                            |                      |                                                                    |         |
| 58 |                            |                      |                                                                    |         |
| 59 |                            |                      |                                                                    |         |
| 60 |                            |                      |                                                                    |         |

|    |                          |                      |                                                                      |     |
|----|--------------------------|----------------------|----------------------------------------------------------------------|-----|
| 1  | Consent or assent:       | <a href="#">#26b</a> | Additional consent provisions for collection and use of              | 4   |
| 2  | ancillary studies        |                      | participant data and biological specimens in ancillary studies, if   |     |
| 3  |                          |                      | applicable                                                           |     |
| 4  |                          |                      |                                                                      |     |
| 5  |                          |                      |                                                                      |     |
| 6  | Confidentiality          | <a href="#">#27</a>  | How personal information about potential and enrolled                | 4   |
| 7  |                          |                      | participants will be collected, shared, and maintained in order to   |     |
| 8  |                          |                      | protect confidentiality before, during, and after the trial          |     |
| 9  |                          |                      |                                                                      |     |
| 10 |                          |                      |                                                                      |     |
| 11 | Declaration of interests | <a href="#">#28</a>  | Financial and other competing interests for principal investigators  | 13  |
| 12 |                          |                      | for the overall trial and each study site                            |     |
| 13 |                          |                      |                                                                      |     |
| 14 |                          |                      |                                                                      |     |
| 15 | Data access              | <a href="#">#29</a>  | Statement of who will have access to the final trial dataset, and    | 4   |
| 16 |                          |                      | disclosure of contractual agreements that limit such access for      |     |
| 17 |                          |                      | investigators                                                        |     |
| 18 |                          |                      |                                                                      |     |
| 19 |                          |                      |                                                                      |     |
| 20 | Ancillary and post trial | <a href="#">#30</a>  | Provisions, if any, for ancillary and post-trial care, and for       | 4   |
| 21 | care                     |                      | compensation to those who suffer harm from trial participation       |     |
| 22 |                          |                      |                                                                      |     |
| 23 |                          |                      |                                                                      |     |
| 24 | Dissemination policy:    | <a href="#">#31a</a> | Plans for investigators and sponsor to communicate trial results     | 4   |
| 25 | trial results            |                      | to participants, healthcare professionals, the public, and other     |     |
| 26 |                          |                      | relevant groups (eg, via publication, reporting in results           |     |
| 27 |                          |                      | databases, or other data sharing arrangements), including any        |     |
| 28 |                          |                      | publication restrictions                                             |     |
| 29 |                          |                      |                                                                      |     |
| 30 |                          |                      |                                                                      |     |
| 31 |                          |                      |                                                                      |     |
| 32 |                          |                      |                                                                      |     |
| 33 | Dissemination policy:    | <a href="#">#31b</a> | Authorship eligibility guidelines and any intended use of            | 1   |
| 34 | authorship               |                      | professional writers                                                 |     |
| 35 |                          |                      |                                                                      |     |
| 36 |                          |                      |                                                                      |     |
| 37 | Dissemination policy:    | <a href="#">#31c</a> | Plans, if any, for granting public access to the full protocol,      | n/a |
| 38 | reproducible research    |                      | participant-level dataset, and statistical code                      |     |
| 39 |                          |                      |                                                                      |     |
| 40 |                          |                      |                                                                      |     |
| 41 | <b>Appendices</b>        |                      |                                                                      |     |
| 42 |                          |                      |                                                                      |     |
| 43 | Informed consent         | <a href="#">#32</a>  | Model consent form and other related documentation given to          | 4   |
| 44 | materials                |                      | participants and authorised surrogates                               |     |
| 45 |                          |                      |                                                                      |     |
| 46 |                          |                      |                                                                      |     |
| 47 | Biological specimens     | <a href="#">#33</a>  | Plans for collection, laboratory evaluation, and storage of          | n/a |
| 48 |                          |                      | biological specimens for genetic or molecular analysis in the        |     |
| 49 |                          |                      | current trial and for future use in ancillary studies, if applicable |     |
| 50 |                          |                      |                                                                      |     |
| 51 |                          |                      |                                                                      |     |

The SPIRIT checklist is distributed under the terms of the Creative Commons Attribution License CC-BY-ND 3.0. This checklist was completed on 09. September 2019 using <https://www.goodreports.org/>, a tool made by the [EQUATOR Network](#) in collaboration with [Penelope.ai](#)

# BMJ Open

## Triple-arm trial of pH (Tri-pH) effect on live birth after ICSI in Egyptian IVF facilities: Protocol of a randomised controlled trial

|                                 |                                                                                                                                                                                                                                                                                                                                                                                                                                                                                                                                                                                                                                                                                                                                                   |
|---------------------------------|---------------------------------------------------------------------------------------------------------------------------------------------------------------------------------------------------------------------------------------------------------------------------------------------------------------------------------------------------------------------------------------------------------------------------------------------------------------------------------------------------------------------------------------------------------------------------------------------------------------------------------------------------------------------------------------------------------------------------------------------------|
| Journal:                        | <i>BMJ Open</i>                                                                                                                                                                                                                                                                                                                                                                                                                                                                                                                                                                                                                                                                                                                                   |
| Manuscript ID                   | bmjopen-2019-034194.R4                                                                                                                                                                                                                                                                                                                                                                                                                                                                                                                                                                                                                                                                                                                            |
| Article Type:                   | Protocol                                                                                                                                                                                                                                                                                                                                                                                                                                                                                                                                                                                                                                                                                                                                          |
| Date Submitted by the Author:   | 20-Dec-2019                                                                                                                                                                                                                                                                                                                                                                                                                                                                                                                                                                                                                                                                                                                                       |
| Complete List of Authors:       | Fawzy, Mohamed; IbnSina Hospital, Ibsina IVF Centre; Banon IVF Centre<br>Emad, Mai; IbnSina Hospital, Ibsina IVF Centre; Banon IVF Centre<br>Wilkinson, Jack; University of Manchester, Centre for Biostatistics; Salford Royal NHS Foundation Trust, Research and Development<br>Mansour, Ragaa; Egyptian IVF-ET Center<br>Mahran, Ali; Assiut University Faculty of Medicine, Department of Dermatology, Venereology and Andrology<br>Fetih, Ahmed; Assiut University Faculty of Medicine, Department of Obstetrics and Gynecology<br>Abdelrahman , Mohamed; Sohag University Faculty of Medicine, Department of Obstetrics and Gynecology<br>AbdelGhafar, Hazem; Sohag University Faculty of Medicine, Department of Obstetrics and Gynecology |
| <b>Primary Subject Heading</b>: | Obstetrics and gynaecology                                                                                                                                                                                                                                                                                                                                                                                                                                                                                                                                                                                                                                                                                                                        |
| Secondary Subject Heading:      | Reproductive medicine, Obstetrics and gynaecology                                                                                                                                                                                                                                                                                                                                                                                                                                                                                                                                                                                                                                                                                                 |
| Keywords:                       | Embryo culture, pH level, culture media, blastocyst formation                                                                                                                                                                                                                                                                                                                                                                                                                                                                                                                                                                                                                                                                                     |
|                                 |                                                                                                                                                                                                                                                                                                                                                                                                                                                                                                                                                                                                                                                                                                                                                   |

SCHOLARONE™  
Manuscripts

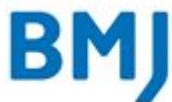

I, the Submitting Author has the right to grant and does grant on behalf of all authors of the Work (as defined in the below author licence), an exclusive licence and/or a non-exclusive licence for contributions from authors who are: i) UK Crown employees; ii) where BMJ has agreed a CC-BY licence shall apply, and/or iii) in accordance with the terms applicable for US Federal Government officers or employees acting as part of their official duties; on a worldwide, perpetual, irrevocable, royalty-free basis to BMJ Publishing Group Ltd ("BMJ") its licensees and where the relevant Journal is co-owned by BMJ to the co-owners of the Journal, to publish the Work in this journal and any other BMJ products and to exploit all rights, as set out in our [licence](#).

The Submitting Author accepts and understands that any supply made under these terms is made by BMJ to the Submitting Author unless you are acting as an employee on behalf of your employer or a postgraduate student of an affiliated institution which is paying any applicable article publishing charge ("APC") for Open Access articles. Where the Submitting Author wishes to make the Work available on an Open Access basis (and intends to pay the relevant APC), the terms of reuse of such Open Access shall be governed by a Creative Commons licence – details of these licences and which [Creative Commons](#) licence will apply to this Work are set out in our licence referred to above.

Other than as permitted in any relevant BMJ Author's Self Archiving Policies, I confirm this Work has not been accepted for publication elsewhere, is not being considered for publication elsewhere and does not duplicate material already published. I confirm all authors consent to publication of this Work and authorise the granting of this licence.



## pH-Study Protocol

**Title: Triple-arm trial of pH (Tri-pH) effect on live birth after ICSI in Egyptian IVF facilities: Protocol of a randomised controlled trial**

Mohamed Fawzy,<sup>ab</sup> Mai Emad,<sup>ab</sup> Jack Wilkinson,<sup>c</sup> Ragaa Mansour,<sup>d</sup> Ali Mahran,<sup>d</sup> Ahmed N. Fetih,<sup>f</sup> Mohamed Y. AbdelRahman,<sup>g</sup> Hazem Abdelghafar,<sup>g</sup>

*IbnSina IVF Centre, Sohag and Banon IVF Centre, Assuit, Egypt*

<sup>a</sup>IbnSina IVF Centre, IbnSina Hospital, Sohag, Egypt; <sup>b</sup>Banon IVF Centre, Assiut, Egypt;

<sup>c</sup>Centre for Biostatistics, University of Manchester, UK; <sup>d</sup>Egyptian IVF-ET Centre, Cairo,

Egypt; <sup>e</sup>Department of Dermatology, Venereology and Andrology, Faculty of Medicine,

Assiut University, Egypt; <sup>f</sup>Department of Obstetrics and Gynecology, Faculty of Medicine,

Assiut University, Egypt; <sup>g</sup>Department of Obstetrics and Gynecology, Faculty of Medicine,

Sohag University, Egypt

Corresponding Author: Dr. Mohamed Fawzy, IVF Laboratory Director (IbnSina and Banon

IVF Centres), IbnSina Hospital, 146 El Aref Square, Sohag, Egypt; Cell: +201011122286; E-

mail: [drfawzy001@me.com](mailto:drfawzy001@me.com)

## Abstract

### Introduction

One potential stressor that can affect pre- and post-implantation embryonic growth after in vitro fertilisation (IVF) is the pH of human embryo culture media. No evidence exists regarding a superior pH level to optimally support human embryo development *in vitro*. Manufactures of culture media recommend a pH range of 7.2 to 7.4, and IVF laboratories routinely use a pH range of 7.25 to 7.3. Both resulted from designers' opinions or experiments on mice models. Given the lack of randomised trials searching for pH effect on live birth rate after IVF, this trial examines the effect of three different levels of pH on the live birth rate.

### Methods and analysis

This multicentre randomised trial will involve centres specialised in IVF in Egypt. Eligible couples for intracytoplasmic sperm injection (ICSI) will be randomised for embryo culture in either 7.2, 7.3, or 7.4 pH levels. The study is designed to detect 10 percentage points difference in live birth rate with 93% per cent power at 1% significance level. The primary outcome is the rate of live birth (delivery of one or more viable infants > 20<sup>th</sup> weeks of gestation) after ICSI. Secondary clinical outcomes include biochemical pregnancy, clinical pregnancy, ongoing pregnancy, miscarriage, preterm births, live birth weight babies, stillbirth, congenital malformation, and cumulative live birth (within one year from randomisation). Embryo development outcomes include fertilisation, blastocyst formation and quality, and embryo cryopreservation and utilisation.

### Ethics and dissemination

Ethics review boards of the involved centres revised and approved this study. Eligible women will sign written informed consent before enrolment. This study has independent data monitoring and safety committee of international experts in trial design and *in vitro* culture.

No plan exists to disseminate results to participants or health communities, except for the independent monitoring and safety committee of the trial.

**Trial registration number** NCT02896777.

### **Keywords**

Embryo culture, pH level, culture media, blastocyst formation

### **Strengths and limitations of this study**

- The study is a randomised controlled trial, which reduces the possibility of bias.
- The study has independent, non-involved in the conduct, data monitoring committee with anytime access to the data.
- Limitations of this study include the inclusion of only ICSI cycles because ICSI is the preferred method of insemination in the participating centres, and the calculation of formed blastocyst is based on an assumption for cleavage-stage transfer cycles.
- The embryologists will be aware of the pH arms during the study conduct.

### **Background**

Assisted reproductive techniques (ART) result in around 65% cumulative live birth within six cycles of *in vitro* fertilisation (IVF),<sup>1</sup> which is relatively suboptimal. In addition, IVF results in adverse perinatal outcomes, such as preterm birth and low birth weight babies compared with the *in vivo* conception.<sup>2</sup> These adverse consequences can rely on factors relating to patients, stimulation, and *in vitro* culture elements. In relation to embryo culture conditions, over 200 variables have been identified as having effects on cycle outcome.<sup>3</sup> One element that may influence embryo development *in vitro* is the pH level of a culture medium, which thus far has been determined by manufacturers of culture media without recourse to a well-powered randomised clinical trial (RCT).<sup>4</sup> pH levels are potential stressors that vary between media brands and from batch-to-batch depending on levels of bicarbonate in culture media and CO<sub>2</sub> in incubators.<sup>5</sup> Hence, pH levels can vary between incubators within a laboratory if

1  
2  
3 it is not well adjusted. Recommendations to measure pH for embryo culture vary from daily  
4  
5 to monthly measurement.<sup>4</sup>  
6

7  
8 Oocytes and embryos have intracellular (pHi), which is modulated by the extracellular pH  
9  
10 (pHe).<sup>6</sup> The *in vitro* conditions including concentrations of bicarbonates, proteins, amino  
11  
12 acids in culture media and the CO<sub>2</sub> of incubators also affect the pHe.<sup>7</sup> The mechanism of pHi  
13  
14 in oocyte and embryo is complex, regulating enzymatic activity, cell division and  
15  
16 differentiation, protein synthesis, metabolism, mitochondrial function, cytoskeletal  
17  
18 regulation, and microtubule dynamics.<sup>7,8</sup> Drifts in pHe translate into changes in pHi, which  
19  
20 can adversely affect cell function if compensatory mechanisms failed to adapt to restore pHi  
21  
22 to a safe level.<sup>8</sup> The pHi can compensate through an active exchange among Na<sup>+</sup>, HCO<sub>3</sub><sup>-</sup>/Cl<sup>-</sup>  
23  
24 and Na<sup>+</sup>/H<sup>+</sup> to maintain it between 7 to 7.3.<sup>5,8</sup> Denuded oocyte for ICSI through fertilisation  
25  
26 as well as vitrified-warmed embryos lack robust compensatory mechanisms of pHi; therefore,  
27  
28 drastic differences between pHe and pHi in these scenarios can disrupt embryo  
29  
30 development.<sup>9-11</sup>  
31  
32  
33  
34

35  
36 That being said, the pH level that can optimise human embryo development *in vitro* is still  
37  
38 unknown.<sup>4,9,12-15</sup> Current recommendations rely on mice models or manufactures of culture  
39  
40 media. Theoretically, a wide range of pHe levels (7.0–7.5) can support human embryo  
41  
42 development *in vitro*. However, a narrower range of pHe levels (7.2 to 7.4) is used in clinical  
43  
44 practice. This is because an extreme acidic pHe level ( $\leq 7$ ) can adversely affect oocyte  
45  
46 spindle leading to no further post-fertilisation events.<sup>4</sup> This level of acidic pHe can delay or  
47  
48 block embryo development *in vitro*.<sup>4</sup> Similar harms can occur for oocyte and embryo, if  
49  
50 alkaline levels of pHe ( $\geq 7.5$ ) are used.<sup>4</sup> Although these potential harms of extreme pHe  
51  
52 levels rely on animal models, underpowered studies, or anecdotal beliefs, we have decided to  
53  
54 investigate a safe range of pHe (7.2 to 7.4). Why this range has been chosen depends on the  
55  
56 recommendations of media manufactures and the clinical practice in laboratories of human  
57  
58  
59  
60

1  
2  
3 embryo culture. Despite the routine use of the range of 7.2 to 7.4 pHe in clinical practice, no  
4  
5 clear evidence exists on which level within this range can better support human embryos to  
6  
7 result in a live birth. This multicentre, randomised, clinical trial aims to identify whether pHe  
8  
9 levels of 7.2, 7.3, or 7.4 can perform better on live birth rate after ICSI in order to investigate  
10  
11 the potential for optimisation.  
12  
13

### 14 **Methods and Design**

15  
16 This is a protocol of a multicentre, randomised, triple-arm, triple-blind clinical trial  
17  
18 (NCT02896777, registered at [www.ClinicalTrials.gov](http://www.ClinicalTrials.gov)) that will compare three levels of pH  
19  
20 for human embryo culture *in vitro* on live birth after ICSI (Figure 1). This partially blind  
21  
22 design represents that clinicians, participants and outcome assessor, not including the  
23  
24 embryologists, will be unaware of the study arms. This multicentre trial will involve private  
25  
26 IVF facilities in Egypt (Ibnsina IVF Centre, Egyptian IVF-ET centre, Banon IVF Centre,  
27  
28 Qena IVF Centre and Amshaj IVF Centre) with the study protocol in their hand before  
29  
30 enrolment of participants. If other IVF facilities join this trial before recruitment, this will be  
31  
32 reported in the study.  
33  
34  
35  
36

### 37 **Intervention**

38  
39 Oocytes and embryos in the three arms will undergo continuous culture from day 0 through  
40  
41 day 5 or 6 without medium renewal. “Arm I” is to culture oocytes and resulting embryos after  
42  
43 ICSI in pHe of  $7.2\pm 0.02$ . “Arm II” is to culture oocytes and resulting embryos after ICSI in  
44  
45 pHe of  $7.3\pm 0.02$ . “Arm III” is to culture oocytes and resulting embryos after ICSI in pHe of  
46  
47  $7.4\pm 0.02$ . This trial will only include intracytoplasmic sperm injection (ICSI) cycles.  
48  
49  
50

### 51 **Patient and Public Involvement**

52  
53 Patients have not been directly involved in the design, planning, and conception of this trial.  
54  
55  
56  
57  
58  
59  
60

### **Randomisation and Masking**

Using an online tool, participants will be randomised to the experimental arms with a 1:1:1 allocation ratio. The allocation sequence of participants will be generated using a permuted block randomisation of 3, 6 and 9 block sizes with unique identifiers in random order, stratified by trial site. Randomisation of participants and storage of its results in sequentially numbered, opaque, sealed envelopes will occur by a secretary with no involvement in patient care, and the sealed envelopes will be provided to trial sites before enrolment of first participant. Eligible participants will be allocated to the relevant arms on the day of maturation trigger and allocation result will be communicated to the laboratory team. Participants, clinicians and outcome assessors for the clinical outcomes will be unaware of the allocation, while embryologists who will assess embryo development will be aware of the allocation.

### **Participants**

The inclusion criteria include:

- 1) Women age of  $\geq 18$  to  $\leq 40$ ;
- 2) BMI of  $\leq 31$ ;
- 3) Anticipated normal responder ( $\geq 5$  antral follicle count or  $\geq 5.4$  pmol/L AMH);
- 4) Women with  $\geq 1$  year of primary or secondary infertility;
- 5) Fresh ejaculate sperm of any count provided that there is  $\geq 1\%$  normal forms with any motile fraction;
- 6) Women undergoing their first ICSI cycle or their second ICSI cycle after previous successful one;
- 7) Women with  $> 7$  mm endometrial thickness at day of maturation trigger;
- and 8) Women with no detected uterine abnormality on transvaginal ultrasound (e.g. submucosal myomas, polyps or septa).

***Women will be excluded if they have:***

- 1) Unilateral oophorectomy;
- 2) Abnormal karyotyping for them or their male partners;
- 3) History of repeated abortions or implantation failure;
- 4) Uncontrolled diabetes;
- 5) Liver or renal disease;
- 6) History of severe ovarian hyperstimulation;
- 7) History of malignancy or borderline pathology;
- 8) Endometriosis;
- 9) Plan for PGD-A;
- 10) Severe male factor includes surgical sperm retrieval or cryopreserved sperm;
- and 11) PCOS, women with history of severe OHSS, and cycles with agonist trigger or any patient with a plan for a “freeze-all”.

**Stimulation Protocol, Oocyte retrieval, and Luteal Phase Support**

Women will undergo controlled ovarian stimulation with agonist mid-luteal pituitary down-regulation (Decapeptyl® 0.1mg, Ferring, Switzerland) or antagonist (Cetrotide® 0.25 mg, Merck Serono) protocols. Agonist will start on day 19–21 of the preceding cycle and will continue through the day of maturation trigger. In the antagonist protocol, women will start the antagonist on stimulation day 6 of the treatment cycle. Women will begin follicular stimulating hormone (rFSH; Gonal-F, Merck Serono) and human menopausal gonadotropin (HMG; Menogon, Ferring) at 150-300 IU with a 2:1 ratio from cycle day 2 through maturation, with dosage adjustment according to ovarian response. When  $\geq 3$  follicles measure  $\geq 18$  mm mean diameter on ultrasound, women will be given a 10,000 IU hCG trigger shot (Choriomon, IBSA) for oocyte maturation. Oocyte retrieval will be performed 37 hours after hCG trigger under transvaginal sonographic guidance. Follicular aspirates will be

1  
2  
3 handled in HEPES-buffered medium (global® HEPES, LifeGlobal, Canada) at 37°C using  
4  
5 tube warmers. Luteal-phase support will be achieved with intramuscular progesterone (100  
6  
7 mg/mL [Prontogest, IBSA]) once daily or vaginal pessaries (400 mg prontogest) twice daily,  
8  
9 starting on day 1 after retrieval (“day 1”) to 12 weeks of gestation, unless negative  
10  
11 pregnancy.  
12  
13

### 14 **Sperm Preparation, Oocyte Denudation and ICSI**

15  
16 Semen samples will be processed using density gradient<sup>16</sup> (Puresperm, Nidacon, Sweden).  
17  
18 The pellet will undergo once washing and incubation at room temperature in HEPES buffered  
19  
20 medium (AllGrade Wash, LifeGlobal). Denudation of oocytes will occur immediately after  
21  
22 collection in 40 IU hyaluronidase (LifeGlobal, Canada) diluted in Global HEPES using a  
23  
24 170-micrometre stripper (Cook, US). Metaphase II (MII) oocytes will undergo ICSI in  
25  
26 Global HEPES medium under an inverted microscope as previously described.<sup>17</sup>  
27  
28  
29

### 30 **Incubator Management and pH Adjustment**

31  
32 We will use only humidified benchtop incubators for this study, involving Labo C-Top  
33  
34 (Labotect, Germany), Minc-1000 (Cook, US), and AD-3100 (Astec, Japan). Each centre will  
35  
36 use only one brand to account for incubators as a variable. If dry incubators such as ESCO  
37  
38 (Esco Micro Pte. Ltd, Singapore) are used in some centres, we will account for differences  
39  
40 between centres by adjusting for trial sites. Incubators will undergo stringent control of  
41  
42 temperature (36.9±0.1°C) by daily validation using certified thermometers. Incubator’s CO<sub>2</sub>  
43  
44 and O<sub>2</sub> levels will be measured daily using a certified gas analyser to ensure that O<sub>2</sub> measures  
45  
46 5%, and CO<sub>2</sub> concentration is at the prespecified level to achieve the required pH. Well-  
47  
48 trained persons across the sites will verify all measurements (temperature, CO<sub>2</sub>, O<sub>2</sub>, and pH  
49  
50 levels). Incubators will be sterilised by 6% H<sub>2</sub>O<sub>2</sub> every four weeks, with an installation of a  
51  
52 new set of inline filters (Green, Lifeglobal, CooperSurgical).<sup>18</sup>  
53  
54  
55  
56  
57  
58  
59  
60



1  
2  
3 A minimum of 3 incubators of a single brand within each facility is obligatory to represent  
4 the three pH arms:  $7.2\pm 0.02$  pH level (Incubator A),  $7.3\pm 0.02$  pH level (Incubator B), and  
5  
6  $7.4\pm 0.02$  level (Incubator C). The three incubators will undergo strict adjustments to maintain  
7  
8 the required pH using a handheld blood gas analyser (Epoc® Reader and Host; BGEM card  
9  
10 US). Constant pH levels will be ensured by a twice-weekly measurement of pH using the  
11  
12 blood gas analyser along with daily measurement of CO<sub>2</sub> levels of incubators. Measurement  
13  
14 of pH will occur following overnight incubation of 1 mL culture media in a central well dish  
15  
16 covered with 0.4 mL of oil. Before the opening of incubators, the handheld blood gas  
17  
18 analyser (Epoc® Reader and Host; BGEM card US) will be prepared for pH measurement as  
19  
20 per the manufacturer protocol. Briefly, after switching on the device, the device automatically  
21  
22 starts to calibrate. Next, we set the temperature at 37°C, and sample type as arterial. Next, we  
23  
24 insert the card to undergo automatic calibration. Next, when the device is ready, we will  
25  
26 aspirate 0.5 mL of calibrated culture media using 1 mL syringe attached to wide needle  
27  
28 calibre. Next, we discard the first droplet and smoothly inject the sample until hearing a beep.  
29  
30 The results of pH, partial CO<sub>2</sub> and O<sub>2</sub> pressures will be ready thereafter. Results will be  
31  
32 reported in each laboratory to compare partial pressures of CO<sub>2</sub> and O<sub>2</sub> with incubator  
33  
34 display. pH levels will be measured every new batch of culture media. Measurements of pH  
35  
36 and CO<sub>2</sub> across centres will be performed using one-brand equipment with periodic  
37  
38 calibration. To account for errors in measurement, one well-trained personnel will be  
39  
40 assigned to measure the pH and double-check the CO<sub>2</sub> level across trial sites.  
41  
42  
43  
44  
45  
46  
47  
48

### 49 **Culture Protocol and Embryo Scoring**

50  
51 Each culture dish (micro-droplet, Vitrolife) will hold 12 droplets of 20 µl each from Global  
52  
53 Total culture medium (Lifeglobal, CooperSurgical, US) overlaid with 5 ml of oil (NidOil,  
54  
55 Nidacon). If a decision to change culture media at any time point of the study conduct is  
56  
57 made, this will be performed at the same time across study sites. Dishes will undergo  
58  
59  
60

1  
2  
3 overnight incubation in the relevant incubator adjusted to the proper pH as per randomisation.  
4  
5 After ICSI, the injected oocytes will undergo washing in culture medium followed by  
6  
7 incubation from day 0 through day 5 or 6 in the relevant pH arm, except for a small portion  
8  
9 of embryos transferred on day 3. The inseminated oocytes will undergo culture in groups of 3  
10  
11 each from days 0 to 5 or 6, with the removal of the unfertilised, abnormally fertilised or  
12  
13 degenerated oocytes at fertilisation check. Two embryologists will perform the fertilisation  
14  
15 check and embryo grading on day 1, 2, 3, and 5 of culture as per the Istanbul Consensus.<sup>19</sup>  
16  
17 All laboratories will vitrify embryos no earlier than day 5. Embryos are suitable for transfer  
18  
19 or vitrification on day 5 provided they are graded 3 1 1 as per the Istanbul Consensus.<sup>19</sup>  
20  
21 Embryos utilised for transfer or cryopreservation will be pictured and recorded in the patient  
22  
23 file. All the recorded pictures from all centres will undergo blind grading by two  
24  
25 independent, experienced embryologists.  
26  
27  
28  
29

### 30 **Embryo Transfer**

31  
32  
33 Women will receive one to two embryos. Women with a reduced uterine cavity or previous  
34  
35 preterm birth will transfer only one embryo. Trial sites will transfer blastocysts on day 5  
36  
37 except for one participating site will transfer embryos on day 3. This issue will be accounted  
38  
39 for by adjusting the analysis by trial site. Embryos will be transferred under sonographic  
40  
41 guidance using the Sydney IVF Transfer Set (Cook, US) as per the standard transfer protocol  
42  
43 in each site. Any remaining utilisable embryos will be vitrified for transfer in subsequent  
44  
45 cycles as we plan to monitor the cumulative live birth resulted from fresh and vitrified-  
46  
47 warmed transfer within one year from randomisation. Women will test the level of serum  
48  
49 hCG for biochemical pregnancy 14 days after oocyte retrieval and will confirm clinical  
50  
51 pregnancy at  $\geq$  week 7 of gestation by detection of intrauterine sacs with a heartbeat on the  
52  
53 ultrasound.  
54  
55  
56  
57  
58  
59  
60

## Outcome Measures

Each outcome will be calculated including all randomised participants in the arms to which they were allocated, with the exception of implantation rate, which will be interpreted cautiously due to concerns over its validity as a measure of treatment effect, and perinatal outcomes, which by definition are only available in the subset of participants achieving live birth. This study will adopt the COMMIT definitions of outcomes,<sup>20</sup> where appropriate.

### *Primary outcome*

Live birth (delivery of one or more viable infants > 20<sup>th</sup> weeks of gestation).

### *Secondary outcomes*

All secondary outcomes will be cautiously reported, since statistical significance has limited meaning in the context of a plurality of tests.

- 1) Biochemical pregnancy (positive  $\beta$ hCG  $\geq$  10 IU/L at 14 days after egg retrieval).
- 2) Clinical pregnancy (registered sacs with a heartbeat on ultrasound > 7<sup>th</sup> weeks of gestation).
- 3) Ongoing pregnancy (continued viable pregnancy > 20<sup>th</sup> weeks of gestation).
- 4) Miscarriage (loss of a clinical pregnancy  $\leq$  20<sup>th</sup> weeks of gestation).
- 5) Term live-birth (i.e. delivery of one or more viable infants  $\geq$  37 weeks of gestation).
- 6) Preterm birth (delivery of one or more viable infants < 37<sup>th</sup> weeks of gestation).
- 7) Very preterm birth (delivery of one or more viable infants < 32<sup>nd</sup> weeks of gestation).
- 8) Low birth weight babies (babies with < 2500 gm within 24 hours of delivery)
- 9) Congenital malformation (delivery of congenitally malformed babies).
- 10) Stillbirth (delivery of nonviable babies > 20 weeks of gestation).
- 11) Cumulative live birth (registered viable neonates after one fresh plus one vitrified-warmed within one year of randomisation).
- 12) Fertilisation (presence of 2 pronuclei  $17 \pm 1$  hr after ICSI).

- 13) Embryo cleavage (cleaved embryos per fertilised oocyte).
- 14) Top-quality embryos on day 3 (7-8 cells with appropriate sizes blastomeres and less than 10% fragmentation by volume).
- 15) Blastocyst formation on day 5 or 6 (formed blastocysts per fertilised oocyte).
- 16) Top-quality blastocyst on day 5 (rounded and dense inner cell mass with many trophoctodermal cells creating a connected zone and a blastocoel more than 100% by volume;  $\geq 3$  1 1 grade per fertilised oocyte).
- 17) Cryopreservation (cryopreserved embryos per fertilised oocyte).
- 18) Live-birth-implantation rate (live birth per embryo transferred).
- 19) Utilised embryos (number of cryopreserved plus transferred embryos per fertilised oocyte).
- 20) Top-quality utilised embryos (number of high-quality embryos transferred plus blastocyst cryopreserved of 3 1 1 grade per fertilised oocyte).

## Statistical Analysis

### *Sample size estimation*

This is a three-arm study looking at pH over a range of 7.2 to 7.4. The hypothesis to be tested is that adjusting the pH value to the edges of this range might result in improvements to the live birth rate, although we remain in equipoise as to whether higher or lower values will be optimal. On the basis of internal data, live birth rates in the region of 25-35% are typical, and our goal is to investigate whether this is associated with varying pH levels.

The study has been powered for a global test of the effect of pH, calculated using plausible birth rates in the three groups of 25%, 30%, and 35%. 646 participants per arm yield 98% power in this scenario, using a 5% significance level. This test makes no assumption about the ordering of the live birth rates in relation to the ordering of the pH values. The high-power level has been adopted to allow for some leeway in relation to the minimum effect

1  
2  
3 size. For illustration, if the birth rates were slightly less distinct, with 26%, 30%, 33% (a  
4 spread of just seven percentage points) this sample size yields 85% power against a 5%  
5 significance level, and 65% at a 1% significance level. We have also been conservative in our  
6 inflation of numbers for dropout. We have allowed for 5% loss to follow up, inflating our  
7 group size to 680. In reality, we will conduct the analysis on an intention to treat basis,  
8 including all randomised women. Women who do not complete treatment (for example, they  
9 do not undergo embryo transfer) will be counted as not having a live birth. The only  
10 exceptions to this will be participants who withdraw consent for their data to be used in the  
11 study. Our inflation for loss to follow up reflects this possibility. We also note that  
12 adjustment for site and age in the analysis will increase power further.  
13  
14  
15  
16  
17  
18  
19  
20  
21  
22  
23  
24  
25

### 26 *Analytical methods*

27  
28 The study conduct will be according to the intention-to-treat approach, where each participant  
29 randomised will be included in the analysis, regardless of protocol deviation. The primary  
30 analysis of live birth will be conducted using logistic regression, with live birth event  
31 regressed on pH groups, adjusted for study site and participant age, which will be  
32 standardised before being entered as a covariate. pH will be entered as a categorical  
33 covariate, allowing a Likelihood Ratio test of the association between pH and live birth rate  
34 across the three groups to be performed. Secondary supportive analyses will be conducted to  
35 try to characterise the nature of any association. This will include a test of a linear trend in  
36 live birth rates across pH groups, which would imply an optimal pH level for the lowest or  
37 highest value, as well as pairwise comparisons between each group (again, these analyses  
38 will be adjusted for site and age). The pairwise comparisons will focus on size and precision  
39 of the odds ratios. Although it would be desirable to power the study for all pairwise  
40 comparisons as the primary outcome, this yields impracticable sample sizes (> 4000  
41  
42  
43  
44  
45  
46  
47  
48  
49  
50  
51  
52  
53  
54  
55  
56  
57  
58  
59  
60

1  
2  
3 participants) against realistic effects. The study has therefore been designed to represent the  
4  
5 most informative test of the hypothesis that pH level affects live birth, that is practicable.  
6  
7 For secondary outcomes, binary variables will be analysed in an analogous fashion to the  
8  
9 primary analysis. Count variables will be analysed using Poisson regression, with zero-  
10  
11 inflated models wherever the outcome is structurally undefined for some participants. Again,  
12  
13 these will be adjusted for site and age. In the analysis of the number of usable embryos,  
14  
15 implanted embryos arising from the day 3 transfer will be included as formed and good  
16  
17 quality blastocysts, while those that do not implant in this portion will be considered blocked  
18  
19 at day 3. Utilisable embryos will be calculated as the total number of transferred embryos and  
20  
21 formed blastocysts. A 1% significance level will be employed. Due to the short treatment  
22  
23 duration, it is anticipated that loss to follow up will be minimal (it is unusual for patients not  
24  
25 to return to clinic to have their embryos transferred, for example). However, if any loss does  
26  
27 occur, these participants will be analysed as having a negative status for the primary  
28  
29 outcome, unless consent to use data is withdrawn. The follow-up period is identified as one  
30  
31 year from randomisation of the last participant provided that all pregnant women have given  
32  
33 birth.  
34  
35  
36  
37  
38

### 39 **Ethics and dissemination**

40  
41  
42 Ethics Review Board of Upper Egypt IVF Network relating to the participating sites  
43  
44 approved this trial (Approval No. 009/2016). An independent safety and monitoring  
45  
46 committee formed of five experts in reproductive endocrinology, reproductive biology,  
47  
48 embryo culture, biostatistics and trial methodology will oversee the trial conduct. All  
49  
50 participants will receive independent counselling from research instructors who are not  
51  
52 involved in patient care or laboratory work. Participants who will accept to participate will  
53  
54 sign a written informed consent before enrolment. Conducting this study will be in  
55  
56 accordance with the Declaration of Helsinki.<sup>21</sup> The trial reporting will be according to the  
57  
58  
59  
60

1  
2  
3 CONSORT statement.<sup>22</sup> No plan exists to amend this protocol and any amendments will  
4  
5 require approval of the safety committee, and will undergo detailed reporting on the trial  
6  
7 registry and in the final manuscript.  
8  
9

## 10 **Discussion**

11  
12 Given the lack of evidence for a superior pH level for human embryo culture and whether  
13  
14 the pH level could make a difference in live birth after IVF, a trial is warranted. This trial is  
15  
16 expected to fill the gap in this area, since at present embryologists must rely upon the  
17  
18 recommendations of manufactures of culture media rather than on a robust evidence base.  
19  
20 This trial is powered to a high level (>90%, with a 1% significance level) against clinically  
21  
22 important differences to minimize the risk for uninformative results. In the case of cleavage-  
23  
24 stage transfer, the calculation of formed blastocysts will be based on the assumption that  
25  
26 implanted embryos represent formed blastocysts, while any transferred embryos which fail to  
27  
28 implant will be counted as blocked at the cleavage stage. Although this definition will be  
29  
30 subject to some error, we believe it is a reasonable way to assess blastocyst formation without  
31  
32 excluding a portion of the data. This point will be further discussed when this trial is  
33  
34 reported. A large number of secondary outcomes will be measured and reported. This is  
35  
36 partially driven by adherence to a recently developed core outcome set for infertility trials,<sup>22</sup>  
37  
38 as well as by the inclusion of some embryological variables which might shed light on the  
39  
40 mechanism of any effects of pH levels. As is usual in clinical trials, Type 1 error is controlled  
41  
42 by the fact that the study inference will be based on the primary outcome variable, live birth.  
43  
44 Accordingly, we will interpret the results of secondary endpoints cautiously in the final  
45  
46 report, since these endpoints are not subject to Type 1 error control.  
47  
48  
49  
50  
51  
52  
53

## 54 **Funding and conflict of interest**

55  
56 The study receives no fund and the authors have no conflict of interest to declare.  
57  
58  
59  
60

### Authors' contributions

Mohamed is the creator of the concept and design of the study, and is the principal investigator of the study. Mohamed Fawzy is also a supervisor for the study conduct across the sites and will make sure that data is periodically sent to for storage in independent database. Jack Wilkinson is the statistician of the study who revised the study design and calculated the sample size and power of the study and he will be responsible for the data analysis and data transfer to the independent safety and monitoring committee. Mai Emad is a primary investigator at Banon IVF centre and a sub-investigator at Ibsina Centre, and she participated in revising the trial protocol and will participate in trial reporting thereafter. Ragaa Mansour is a primary investigator at the Egyptian IVF-ET Centre, and revised the trial protocol and provided advice during the protocol design. Ali Mahran is the andrologist of the study that will make sure all male partners are in line with the inclusion criteria, and revised the protocol and provided comments. Ahmed Fetih is a primary investigator at Banon IVF Centre and participated revising the protocol and provided comments. Mohamed AbdelRahman participated in the trial design and is a primary investigator at Amshaj IVF Centre. Hazem Abdelghafar is a primary investigator at Ibsina IVF Centre and participated in the trial design. All authors provided comments and agreed on the study design and protocol, and will participate in reporting this trial thereafter.

### References

1. Smith A, Tilling K, Nelson SM, et al. Live-Birth Rate Associated With Repeat In Vitro Fertilization Treatment Cycles. *JAMA* 2015;314(24):2654-62. doi: 10.1001/jama.2015.17296 [published Online First: 2015/12/31]
2. Berntsen S, Söderström-Anttila V, Wennerholm U-B, et al. The health of children conceived by ART: 'the chicken or the egg?'. *Human Reproduction Update* 2019;25(2):137-58. doi: 10.1093/humupd/dmz001
3. Pool TB, Schoolfield J, Han D. Human embryo culture media comparisons. *Methods Mol Biol* 2012;912:367-86. doi: 10.1007/978-1-61779-971-6\_21 [published Online First: 2012/07/26]
4. Swain JE. Is there an optimal pH for culture media used in clinical IVF? *Hum Reprod Update* 2012;18(3):333-9. doi: 10.1093/humupd/dmr053 [published Online First: 2012/02/09]



- 1  
2  
3 5. Tarahomi M, de Melker AA, van Wely M, et al. pH stability of human preimplantation  
4 embryo culture media: effects of culture and batches. *Reprod Biomed Online*  
5 2018;37(4):409-14. doi: 10.1016/j.rbmo.2018.08.011 [published Online First:  
6 2018/09/20]
- 7  
8 6. Shalgi R, Kraicer PF, Soferman N. Gases and electrolytes of human follicular fluid. *J*  
9 *Reprod Fertil* 1972;28(3):335-40. [published Online First: 1972/03/01]
- 10  
11 7. Phillips KP, Leveille MC, Claman P, et al. Intracellular pH regulation in human  
12 preimplantation embryos. *Hum Reprod* 2000;15(4):896-904. doi:  
13 10.1093/humrep/15.4.896 [published Online First: 2000/03/31]
- 14  
15 8. FitzHarris G, Siyanov V, Baltz JM. Granulosa cells regulate oocyte intracellular pH  
16 against acidosis in preantral follicles by multiple mechanisms. *Development*  
17 2007;134(23):4283-95. doi: 10.1242/dev.005272 [published Online First: 2007/11/06]
- 18  
19 9. Dale B, Menezo Y, Cohen J, et al. Intracellular pH regulation in the human oocyte. *Hum*  
20 *Reprod* 1998;13(4):964-70. doi: 10.1093/humrep/13.4.964 [published Online First:  
21 1998/06/10]
- 22  
23 10. Lane M, Baltz JM, Bavister BD. Na<sup>+</sup>/H<sup>+</sup> antiporter activity in hamster embryos is  
24 activated during fertilization. *Dev Biol* 1999;208(1):244-52. doi:  
25 10.1006/dbio.1999.9198 [published Online First: 1999/03/17]
- 26  
27 11. Swain JE, Pool TB. New pH-buffering system for media utilized during gamete and  
28 embryo manipulations for assisted reproduction. *Reprod Biomed Online*  
29 2009;18(6):799-810. [published Online First: 2009/06/06]
- 30  
31 12. Hentemann M, Mousavi K, Bertheussen K. Differential pH in embryo culture. *Fertil*  
32 *Steril* 2011;95(4):1291-4. doi: 10.1016/j.fertnstert.2010.10.018 [published Online  
33 First: 2010/11/12]
- 34  
35 13. Carney EW, Bavister BD. Regulation of hamster embryo development in vitro by carbon  
36 dioxide. *Biol Reprod* 1987;36(5):1155-63. doi: 10.1095/biolreprod36.5.1155  
37 [published Online First: 1987/06/01]
- 38  
39 14. Edwards LJ, Williams DA, Gardner DK. Intracellular pH of the mouse preimplantation  
40 embryo: amino acids act as buffers of intracellular pH. *Hum Reprod*  
41 1998;13(12):3441-8. doi: 10.1093/humrep/13.12.3441 [published Online First:  
42 1999/01/14]
- 43  
44 15. Edwards LJ, Williams DA, Gardner DK. Intracellular pH of the preimplantation mouse  
45 embryo: effects of extracellular pH and weak acids. *Mol Reprod Dev* 1998;50(4):434-  
46 42. doi: 10.1002/(SICI)1098-2795(199808)50:4<434::AID-MRD7>3.0.CO;2-J  
47 [published Online First: 1998/07/21]
- 48  
49 16. World Health Organization. WHO laboratory manual for the examination and processing  
50 of human semen. 5th ed. Geneva: World Health Organization 2010.
- 51  
52 17. Palermo G, Joris H, Devroey P, et al. Pregnancies after intracytoplasmic injection of  
53 single spermatozoon into an oocyte. *Lancet* 1992;340(8810):17-8. doi: 10.1016/0140-  
54 6736(92)92425-f [published Online First: 1992/07/04]
- 55  
56 18. Mortimer D, Cohen J, Mortimer ST, et al. Cairo consensus on the IVF laboratory  
57 environment and air quality: report of an expert meeting. *Reprod Biomed Online*  
58 2018;36(6):658-74. doi: 10.1016/j.rbmo.2018.02.005 [published Online First:  
59 2018/04/17]
- 60  
61 19. Medicine ASIR, Embryology ESIG. Istanbul consensus workshop on embryo assessment:  
62 proceedings of an expert meeting. *Reprod Biomed Online* 2011;22(6):632-46. doi:  
63 10.1016/j.rbmo.2011.02.001 [published Online First: 2011/04/13]
- 64  
65 20. Duffy JMN, Bhattacharya S, Curtis C, et al. A protocol developing, disseminating and  
66 implementing a core outcome set for infertility. *Hum Reprod Open*

- 1  
2  
3 2018;2018(3):hoy007. doi: 10.1093/hropen/hoy007 [published Online First:  
4 2019/03/22]  
5  
6 21. Williams JR. The Declaration of Helsinki and public health. *Bull World Health Organ*  
7 2008;86(8):650-2. doi: 10.2471/blt.08.050955 [published Online First: 2008/09/18]  
8 22. Schulz KF, Altman DG, Moher D, et al. CONSORT 2010 statement: updated guidelines  
9 for reporting parallel group randomised trials. *BMJ* 2010;340:c332. doi:  
10 10.1136/bmj.c332 [published Online First: 2010/03/25]  
11  
12

13 Figure Legend: Trial plan for enrolment  
14  
15  
16  
17  
18  
19  
20  
21  
22  
23  
24  
25  
26  
27  
28  
29  
30  
31  
32  
33  
34  
35  
36  
37  
38  
39  
40  
41  
42  
43  
44  
45  
46  
47  
48  
49  
50  
51  
52  
53  
54  
55  
56  
57  
58  
59  
60

Couples will receive detailed information on the possible risks and potential benefits.

Couples with primary acceptance will be randomized to the three pH arms of the study

Randomization will occur to assign ~ 2100 participants to undergo day-5 fresh embryo-transfer utilizing the blastocysts developed in the either 7.2, 7.3 or 7.4 pH levels.

### Women randomization

~ 700 participants will be randomized to undergo embryo culture in 7.2 pH level for 5 to 6 days and will receive fresh embryo transfer from this arm.

~ 700 participants will be randomized to undergo embryo culture in 7.3 pH level for 5 to 6 days and will receive fresh embryo transfer from this arm.

~ 700 participants will be randomized to undergo embryo culture in 7.4 pH level for 5 to 6 days and will receive fresh embryo transfer from this arm.

The intention-to-treat will include all randomized participants to 7.2 pH level group with the live birth rate as primary endpoint.

The intention-to-treat will include all randomized participants to 7.3 pH level group with the live birth rate as primary endpoint.

The intention-to-treat will include all randomized participants to 7.4 pH level group with the live birth rate as primary endpoint.

## pH trial plan for enrollment and outcomes – 7.2, 7.3 and 7.4 pH levels

# Reporting checklist for protocol of a clinical trial.

Based on the SPIRIT guidelines.

## Instructions to authors

Complete this checklist by entering the page numbers from your manuscript where readers will find each of the items listed below.

Your article may not currently address all the items on the checklist. Please modify your text to include the missing information. If you are certain that an item does not apply, please write "n/a" and provide a short explanation.

Upload your completed checklist as an extra file when you submit to a journal.

In your methods section, say that you used the SPIRIT reporting guidelines, and cite them as:

Chan A-W, Tetzlaff JM, Altman DG, Laupacis A, Gøtzsche PC, Krleža-Jerić K, Hróbjartsson A, Mann H, Dickersin K, Berlin J, Doré C, Parulekar W, Summerskill W, Groves T, Schulz K, Sox H, Rockhold FW, Rennie D, Moher D. SPIRIT 2013 Statement: Defining standard protocol items for clinical trials. *Ann Intern Med.* 2013;158(3):200-207

|                                             |                     | Reporting Item                                                                                               | Page Number |
|---------------------------------------------|---------------------|--------------------------------------------------------------------------------------------------------------|-------------|
| <b>Administrative information</b>           |                     |                                                                                                              |             |
| Title                                       | <a href="#">#1</a>  | Descriptive title identifying the study design, population, interventions, and, if applicable, trial acronym | 1           |
| Trial registration                          | <a href="#">#2a</a> | Trial identifier and registry name. If not yet registered, name of intended registry                         | 2           |
| Trial registration: data set                | <a href="#">#2b</a> | All items from the World Health Organization Trial Registration Data Set                                     | 4           |
| Protocol version                            | <a href="#">#3</a>  | Date and version identifier                                                                                  | 4           |
| Funding                                     | <a href="#">#4</a>  | Sources and types of financial, material, and other support                                                  | 13          |
| Roles and responsibilities: contributorship | <a href="#">#5a</a> | Names, affiliations, and roles of protocol contributors                                                      | 1           |

|    |                           |                     |                                                                    |       |
|----|---------------------------|---------------------|--------------------------------------------------------------------|-------|
| 1  | Roles and                 | <a href="#">#5b</a> | Name and contact information for the trial sponsor                 | 1     |
| 2  | responsibilities:         |                     |                                                                    |       |
| 3  | sponsor contact           |                     |                                                                    |       |
| 4  | information               |                     |                                                                    |       |
| 5  |                           |                     |                                                                    |       |
| 6  |                           |                     |                                                                    |       |
| 7  |                           |                     |                                                                    |       |
| 8  | Roles and                 | <a href="#">#5c</a> | Role of study sponsor and funders, if any, in study design;        | 13    |
| 9  | responsibilities:         |                     | collection, management, analysis, and interpretation of data;      |       |
| 10 | sponsor and funder        |                     | writing of the report; and the decision to submit the report for   |       |
| 11 |                           |                     | publication, including whether they will have ultimate authority   |       |
| 12 |                           |                     | over any of these activities                                       |       |
| 13 |                           |                     |                                                                    |       |
| 14 |                           |                     |                                                                    |       |
| 15 |                           |                     |                                                                    |       |
| 16 | Roles and                 | <a href="#">#5d</a> | Composition, roles, and responsibilities of the coordinating       | 4     |
| 17 | responsibilities:         |                     | centre, steering committee, endpoint adjudication committee,       |       |
| 18 | committees                |                     | data management team, and other individuals or groups              |       |
| 19 |                           |                     | overseeing the trial, if applicable (see Item 21a for data         |       |
| 20 |                           |                     | monitoring committee)                                              |       |
| 21 |                           |                     |                                                                    |       |
| 22 |                           |                     |                                                                    |       |
| 23 |                           |                     |                                                                    |       |
| 24 | <b>Introduction</b>       |                     |                                                                    |       |
| 25 |                           |                     |                                                                    |       |
| 26 |                           |                     |                                                                    |       |
| 27 | Background and            | <a href="#">#6a</a> | Description of research question and justification for undertaking | 2 & 3 |
| 28 | rationale                 |                     | the trial, including summary of relevant studies (published and    |       |
| 29 |                           |                     | unpublished) examining benefits and harms for each intervention    |       |
| 30 |                           |                     |                                                                    |       |
| 31 |                           |                     |                                                                    |       |
| 32 | Background and            | <a href="#">#6b</a> | Explanation for choice of comparators                              | 2 & 3 |
| 33 | rationale: choice of      |                     |                                                                    |       |
| 34 | comparators               |                     |                                                                    |       |
| 35 |                           |                     |                                                                    |       |
| 36 |                           |                     |                                                                    |       |
| 37 | Objectives                | <a href="#">#7</a>  | Specific objectives or hypotheses                                  | 3 & 4 |
| 38 |                           |                     |                                                                    |       |
| 39 |                           |                     |                                                                    |       |
| 40 | Trial design              | <a href="#">#8</a>  | Description of trial design including type of trial (eg, parallel  | 4     |
| 41 |                           |                     | group, crossover, factorial, single group), allocation ratio, and  |       |
| 42 |                           |                     | framework (eg, superiority, equivalence, non-inferiority,          |       |
| 43 |                           |                     | exploratory)                                                       |       |
| 44 |                           |                     |                                                                    |       |
| 45 |                           |                     |                                                                    |       |
| 46 | <b>Methods:</b>           |                     |                                                                    |       |
| 47 | <b>Participants,</b>      |                     |                                                                    |       |
| 48 | <b>interventions, and</b> |                     |                                                                    |       |
| 49 | <b>outcomes</b>           |                     |                                                                    |       |
| 50 |                           |                     |                                                                    |       |
| 51 |                           |                     |                                                                    |       |
| 52 |                           |                     |                                                                    |       |
| 53 | Study setting             | <a href="#">#9</a>  | Description of study settings (eg, community clinic, academic      | 4     |
| 54 |                           |                     | hospital) and list of countries where data will be collected.      |       |
| 55 |                           |                     | Reference to where list of study sites can be obtained             |       |
| 56 |                           |                     |                                                                    |       |
| 57 |                           |                     |                                                                    |       |
| 58 |                           |                     |                                                                    |       |
| 59 |                           |                     |                                                                    |       |
| 60 |                           |                     |                                                                    |       |

|    |                              |                      |                                                                                                                                                                                                                                                                                                                                                                                |         |
|----|------------------------------|----------------------|--------------------------------------------------------------------------------------------------------------------------------------------------------------------------------------------------------------------------------------------------------------------------------------------------------------------------------------------------------------------------------|---------|
| 1  | Eligibility criteria         | <a href="#">#10</a>  | Inclusion and exclusion criteria for participants. If applicable, eligibility criteria for study centres and individuals who will perform the interventions (eg, surgeons, psychotherapists)                                                                                                                                                                                   | 5 & 6   |
| 2  |                              |                      |                                                                                                                                                                                                                                                                                                                                                                                |         |
| 3  |                              |                      |                                                                                                                                                                                                                                                                                                                                                                                |         |
| 4  |                              |                      |                                                                                                                                                                                                                                                                                                                                                                                |         |
| 5  |                              |                      |                                                                                                                                                                                                                                                                                                                                                                                |         |
| 6  | Interventions:               | <a href="#">#11a</a> | Interventions for each group with sufficient detail to allow replication, including how and when they will be administered                                                                                                                                                                                                                                                     | 4 & 5   |
| 7  | description                  |                      |                                                                                                                                                                                                                                                                                                                                                                                |         |
| 8  |                              |                      |                                                                                                                                                                                                                                                                                                                                                                                |         |
| 9  |                              |                      |                                                                                                                                                                                                                                                                                                                                                                                |         |
| 10 | Interventions:               | <a href="#">#11b</a> | Criteria for discontinuing or modifying allocated interventions for a given trial participant (eg, drug dose change in response to harms, participant request, or improving / worsening disease)                                                                                                                                                                               | 4 & 5   |
| 11 | modifications                |                      |                                                                                                                                                                                                                                                                                                                                                                                |         |
| 12 |                              |                      |                                                                                                                                                                                                                                                                                                                                                                                |         |
| 13 |                              |                      |                                                                                                                                                                                                                                                                                                                                                                                |         |
| 14 |                              |                      |                                                                                                                                                                                                                                                                                                                                                                                |         |
| 15 | Interventions:               | <a href="#">#11c</a> | Strategies to improve adherence to intervention protocols, and any procedures for monitoring adherence (eg, drug tablet return; laboratory tests)                                                                                                                                                                                                                              | 4 & 5   |
| 16 | adherence                    |                      |                                                                                                                                                                                                                                                                                                                                                                                |         |
| 17 |                              |                      |                                                                                                                                                                                                                                                                                                                                                                                |         |
| 18 |                              |                      |                                                                                                                                                                                                                                                                                                                                                                                |         |
| 19 |                              |                      |                                                                                                                                                                                                                                                                                                                                                                                |         |
| 20 |                              |                      |                                                                                                                                                                                                                                                                                                                                                                                |         |
| 21 | Interventions:               | <a href="#">#11d</a> | Relevant concomitant care and interventions that are permitted or prohibited during the trial                                                                                                                                                                                                                                                                                  | 9       |
| 22 | concomitant care             |                      |                                                                                                                                                                                                                                                                                                                                                                                |         |
| 23 |                              |                      |                                                                                                                                                                                                                                                                                                                                                                                |         |
| 24 |                              |                      |                                                                                                                                                                                                                                                                                                                                                                                |         |
| 25 | Outcomes                     | <a href="#">#12</a>  | Primary, secondary, and other outcomes, including the specific measurement variable (eg, systolic blood pressure), analysis metric (eg, change from baseline, final value, time to event), method of aggregation (eg, median, proportion), and time point for each outcome. Explanation of the clinical relevance of chosen efficacy and harm outcomes is strongly recommended | 10 & 11 |
| 26 |                              |                      |                                                                                                                                                                                                                                                                                                                                                                                |         |
| 27 |                              |                      |                                                                                                                                                                                                                                                                                                                                                                                |         |
| 28 |                              |                      |                                                                                                                                                                                                                                                                                                                                                                                |         |
| 29 |                              |                      |                                                                                                                                                                                                                                                                                                                                                                                |         |
| 30 |                              |                      |                                                                                                                                                                                                                                                                                                                                                                                |         |
| 31 |                              |                      |                                                                                                                                                                                                                                                                                                                                                                                |         |
| 32 |                              |                      |                                                                                                                                                                                                                                                                                                                                                                                |         |
| 33 |                              |                      |                                                                                                                                                                                                                                                                                                                                                                                |         |
| 34 | Participant timeline         | <a href="#">#13</a>  | Time schedule of enrolment, interventions (including any run-ins and washouts), assessments, and visits for participants. A schematic diagram is highly recommended (see Figure)                                                                                                                                                                                               | 8       |
| 35 |                              |                      |                                                                                                                                                                                                                                                                                                                                                                                |         |
| 36 |                              |                      |                                                                                                                                                                                                                                                                                                                                                                                |         |
| 37 |                              |                      |                                                                                                                                                                                                                                                                                                                                                                                |         |
| 38 |                              |                      |                                                                                                                                                                                                                                                                                                                                                                                |         |
| 39 |                              |                      |                                                                                                                                                                                                                                                                                                                                                                                |         |
| 40 | Sample size                  | <a href="#">#14</a>  | Estimated number of participants needed to achieve study objectives and how it was determined, including clinical and statistical assumptions supporting any sample size calculations                                                                                                                                                                                          | 11 & 12 |
| 41 |                              |                      |                                                                                                                                                                                                                                                                                                                                                                                |         |
| 42 |                              |                      |                                                                                                                                                                                                                                                                                                                                                                                |         |
| 43 |                              |                      |                                                                                                                                                                                                                                                                                                                                                                                |         |
| 44 |                              |                      |                                                                                                                                                                                                                                                                                                                                                                                |         |
| 45 | Recruitment                  | <a href="#">#15</a>  | Strategies for achieving adequate participant enrolment to reach target sample size                                                                                                                                                                                                                                                                                            | 4       |
| 46 |                              |                      |                                                                                                                                                                                                                                                                                                                                                                                |         |
| 47 |                              |                      |                                                                                                                                                                                                                                                                                                                                                                                |         |
| 48 |                              |                      |                                                                                                                                                                                                                                                                                                                                                                                |         |
| 49 | <b>Methods: Assignment</b>   |                      |                                                                                                                                                                                                                                                                                                                                                                                |         |
| 50 | <b>of interventions (for</b> |                      |                                                                                                                                                                                                                                                                                                                                                                                |         |
| 51 | <b>controlled trials)</b>    |                      |                                                                                                                                                                                                                                                                                                                                                                                |         |
| 52 |                              |                      |                                                                                                                                                                                                                                                                                                                                                                                |         |
| 53 |                              |                      |                                                                                                                                                                                                                                                                                                                                                                                |         |
| 54 | Allocation: sequence         | <a href="#">#16a</a> | Method of generating the allocation sequence (eg, computer-generated random numbers), and list of any factors for stratification. To reduce predictability of a random sequence, details of any planned restriction (eg, blocking) should be                                                                                                                                   | 5       |
| 55 | generation                   |                      |                                                                                                                                                                                                                                                                                                                                                                                |         |
| 56 |                              |                      |                                                                                                                                                                                                                                                                                                                                                                                |         |
| 57 |                              |                      |                                                                                                                                                                                                                                                                                                                                                                                |         |
| 58 |                              |                      |                                                                                                                                                                                                                                                                                                                                                                                |         |
| 59 |                              |                      |                                                                                                                                                                                                                                                                                                                                                                                |         |
| 60 |                              |                      |                                                                                                                                                                                                                                                                                                                                                                                |         |

provided in a separate document that is unavailable to those who enrol participants or assign interventions

|    |                        |                      |                                                                     |
|----|------------------------|----------------------|---------------------------------------------------------------------|
| 1  |                        |                      |                                                                     |
| 2  |                        |                      |                                                                     |
| 3  |                        |                      |                                                                     |
| 4  | Allocation             | <a href="#">#16b</a> | Mechanism of implementing the allocation sequence (eg, central      |
| 5  | concealment            |                      | telephone; sequentially numbered, opaque, sealed envelopes),        |
| 6  |                        |                      | describing any steps to conceal the sequence until interventions    |
| 7  | mechanism              |                      | are assigned                                                        |
| 8  |                        |                      |                                                                     |
| 9  |                        |                      |                                                                     |
| 10 |                        |                      |                                                                     |
| 11 | Allocation:            | <a href="#">#16c</a> | Who will generate the allocation sequence, who will enrol           |
| 12 | implementation         |                      | participants, and who will assign participants to interventions     |
| 13 |                        |                      |                                                                     |
| 14 | Blinding (masking)     | <a href="#">#17a</a> | Who will be blinded after assignment to interventions (eg, trial    |
| 15 |                        |                      | participants, care providers, outcome assessors, data analysts),    |
| 16 |                        |                      | and how                                                             |
| 17 |                        |                      |                                                                     |
| 18 |                        |                      |                                                                     |
| 19 |                        |                      |                                                                     |
| 20 | Blinding (masking):    | <a href="#">#17b</a> | If blinded, circumstances under which unblinding is permissible,    |
| 21 | emergency unblinding   |                      | and procedure for revealing a participant's allocated intervention  |
| 22 |                        |                      | during the trial                                                    |
| 23 |                        |                      |                                                                     |
| 24 |                        |                      |                                                                     |
| 25 | <b>Methods: Data</b>   |                      |                                                                     |
| 26 | <b>collection,</b>     |                      |                                                                     |
| 27 | <b>management, and</b> |                      |                                                                     |
| 28 | <b>analysis</b>        |                      |                                                                     |
| 29 |                        |                      |                                                                     |
| 30 |                        |                      |                                                                     |
| 31 |                        |                      |                                                                     |
| 32 | Data collection plan   | <a href="#">#18a</a> | Plans for assessment and collection of outcome, baseline, and       |
| 33 |                        |                      | other trial data, including any related processes to promote data   |
| 34 |                        |                      | quality (eg, duplicate measurements, training of assessors) and a   |
| 35 |                        |                      | description of study instruments (eg, questionnaires, laboratory    |
| 36 |                        |                      | tests) along with their reliability and validity, if known.         |
| 37 |                        |                      | Reference to where data collection forms can be found, if not in    |
| 38 |                        |                      | the protocol                                                        |
| 39 |                        |                      |                                                                     |
| 40 |                        |                      |                                                                     |
| 41 |                        |                      |                                                                     |
| 42 |                        |                      |                                                                     |
| 43 | Data collection plan:  | <a href="#">#18b</a> | Plans to promote participant retention and complete follow-up,      |
| 44 | retention              |                      | including list of any outcome data to be collected for participants |
| 45 |                        |                      | who discontinue or deviate from intervention protocols              |
| 46 |                        |                      |                                                                     |
| 47 |                        |                      |                                                                     |
| 48 | Data management        | <a href="#">#19</a>  | Plans for data entry, coding, security, and storage, including any  |
| 49 |                        |                      | related processes to promote data quality (eg, double data entry;   |
| 50 |                        |                      | range checks for data values). Reference to where details of data   |
| 51 |                        |                      | management procedures can be found, if not in the protocol          |
| 52 |                        |                      |                                                                     |
| 53 |                        |                      |                                                                     |
| 54 |                        |                      |                                                                     |
| 55 | Statistics: outcomes   | <a href="#">#20a</a> | Statistical methods for analysing primary and secondary             |
| 56 |                        |                      | outcomes. Reference to where other details of the statistical       |
| 57 |                        |                      | analysis plan can be found, if not in the protocol                  |
| 58 |                        |                      |                                                                     |
| 59 |                        |                      |                                                                     |
| 60 |                        |                      |                                                                     |



|    |                            |                      |                                                                    |         |
|----|----------------------------|----------------------|--------------------------------------------------------------------|---------|
| 1  | Statistics: additional     | <a href="#">#20b</a> | Methods for any additional analyses (eg, subgroup and adjusted     | 11 & 12 |
| 2  | analyses                   |                      | analyses)                                                          |         |
| 3  |                            |                      |                                                                    |         |
| 4  | Statistics: analysis       | <a href="#">#20c</a> | Definition of analysis population relating to protocol non-        | 11 & 12 |
| 5  | population and missing     |                      | adherence (eg, as randomised analysis), and any statistical        |         |
| 6  | data                       |                      | methods to handle missing data (eg, multiple imputation)           |         |
| 7  |                            |                      |                                                                    |         |
| 8  |                            |                      |                                                                    |         |
| 9  |                            |                      |                                                                    |         |
| 10 | <b>Methods: Monitoring</b> |                      |                                                                    |         |
| 11 |                            |                      |                                                                    |         |
| 12 | Data monitoring:           | <a href="#">#21a</a> | Composition of data monitoring committee (DMC); summary of         | 4       |
| 13 | formal committee           |                      | its role and reporting structure; statement of whether it is       |         |
| 14 |                            |                      | independent from the sponsor and competing interests; and          |         |
| 15 |                            |                      | reference to where further details about its charter can be found, |         |
| 16 |                            |                      | if not in the protocol. Alternatively, an explanation of why a     |         |
| 17 |                            |                      | DMC is not needed                                                  |         |
| 18 |                            |                      |                                                                    |         |
| 19 |                            |                      |                                                                    |         |
| 20 |                            |                      |                                                                    |         |
| 21 |                            |                      |                                                                    |         |
| 22 | Data monitoring:           | <a href="#">#21b</a> | Description of any interim analyses and stopping guidelines,       | 4, 11 & |
| 23 | interim analysis           |                      | including who will have access to these interim results and make   | 12      |
| 24 |                            |                      | the final decision to terminate the trial                          |         |
| 25 |                            |                      |                                                                    |         |
| 26 |                            |                      |                                                                    |         |
| 27 | Harms                      | <a href="#">#22</a>  | Plans for collecting, assessing, reporting, and managing solicited | 4       |
| 28 |                            |                      | and spontaneously reported adverse events and other unintended     |         |
| 29 |                            |                      | effects of trial interventions or trial conduct                    |         |
| 30 |                            |                      |                                                                    |         |
| 31 |                            |                      |                                                                    |         |
| 32 |                            |                      |                                                                    |         |
| 33 | Auditing                   | <a href="#">#23</a>  | Frequency and procedures for auditing trial conduct, if any, and   | 4       |
| 34 |                            |                      | whether the process will be independent from investigators and     |         |
| 35 |                            |                      | the sponsor                                                        |         |
| 36 |                            |                      |                                                                    |         |
| 37 |                            |                      |                                                                    |         |
| 38 | <b>Ethics and</b>          |                      |                                                                    |         |
| 39 | <b>dissemination</b>       |                      |                                                                    |         |
| 40 |                            |                      |                                                                    |         |
| 41 |                            |                      |                                                                    |         |
| 42 | Research ethics            | <a href="#">#24</a>  | Plans for seeking research ethics committee / institutional review | 4       |
| 43 | approval                   |                      | board (REC / IRB) approval                                         |         |
| 44 |                            |                      |                                                                    |         |
| 45 |                            |                      |                                                                    |         |
| 46 | Protocol amendments        | <a href="#">#25</a>  | Plans for communicating important protocol modifications (eg,      | 4       |
| 47 |                            |                      | changes to eligibility criteria, outcomes, analyses) to relevant   |         |
| 48 |                            |                      | parties (eg, investigators, REC / IRBs, trial participants, trial  |         |
| 49 |                            |                      | registries, journals, regulators)                                  |         |
| 50 |                            |                      |                                                                    |         |
| 51 |                            |                      |                                                                    |         |
| 52 |                            |                      |                                                                    |         |
| 53 | Consent or assent          | <a href="#">#26a</a> | Who will obtain informed consent or assent from potential trial    | 4       |
| 54 |                            |                      | participants or authorised surrogates, and how (see Item 32)       |         |
| 55 |                            |                      |                                                                    |         |
| 56 |                            |                      |                                                                    |         |
| 57 |                            |                      |                                                                    |         |
| 58 |                            |                      |                                                                    |         |
| 59 |                            |                      |                                                                    |         |
| 60 |                            |                      |                                                                    |         |



|    |                          |                      |                                                                      |     |
|----|--------------------------|----------------------|----------------------------------------------------------------------|-----|
| 1  | Consent or assent:       | <a href="#">#26b</a> | Additional consent provisions for collection and use of              | 4   |
| 2  | ancillary studies        |                      | participant data and biological specimens in ancillary studies, if   |     |
| 3  |                          |                      | applicable                                                           |     |
| 4  |                          |                      |                                                                      |     |
| 5  |                          |                      |                                                                      |     |
| 6  | Confidentiality          | <a href="#">#27</a>  | How personal information about potential and enrolled                | 4   |
| 7  |                          |                      | participants will be collected, shared, and maintained in order to   |     |
| 8  |                          |                      | protect confidentiality before, during, and after the trial          |     |
| 9  |                          |                      |                                                                      |     |
| 10 |                          |                      |                                                                      |     |
| 11 | Declaration of interests | <a href="#">#28</a>  | Financial and other competing interests for principal investigators  | 13  |
| 12 |                          |                      | for the overall trial and each study site                            |     |
| 13 |                          |                      |                                                                      |     |
| 14 |                          |                      |                                                                      |     |
| 15 | Data access              | <a href="#">#29</a>  | Statement of who will have access to the final trial dataset, and    | 4   |
| 16 |                          |                      | disclosure of contractual agreements that limit such access for      |     |
| 17 |                          |                      | investigators                                                        |     |
| 18 |                          |                      |                                                                      |     |
| 19 |                          |                      |                                                                      |     |
| 20 | Ancillary and post trial | <a href="#">#30</a>  | Provisions, if any, for ancillary and post-trial care, and for       | 4   |
| 21 | care                     |                      | compensation to those who suffer harm from trial participation       |     |
| 22 |                          |                      |                                                                      |     |
| 23 |                          |                      |                                                                      |     |
| 24 | Dissemination policy:    | <a href="#">#31a</a> | Plans for investigators and sponsor to communicate trial results     | 4   |
| 25 | trial results            |                      | to participants, healthcare professionals, the public, and other     |     |
| 26 |                          |                      | relevant groups (eg, via publication, reporting in results           |     |
| 27 |                          |                      | databases, or other data sharing arrangements), including any        |     |
| 28 |                          |                      | publication restrictions                                             |     |
| 29 |                          |                      |                                                                      |     |
| 30 |                          |                      |                                                                      |     |
| 31 |                          |                      |                                                                      |     |
| 32 |                          |                      |                                                                      |     |
| 33 | Dissemination policy:    | <a href="#">#31b</a> | Authorship eligibility guidelines and any intended use of            | 1   |
| 34 | authorship               |                      | professional writers                                                 |     |
| 35 |                          |                      |                                                                      |     |
| 36 |                          |                      |                                                                      |     |
| 37 | Dissemination policy:    | <a href="#">#31c</a> | Plans, if any, for granting public access to the full protocol,      | n/a |
| 38 | reproducible research    |                      | participant-level dataset, and statistical code                      |     |
| 39 |                          |                      |                                                                      |     |
| 40 |                          |                      |                                                                      |     |
| 41 | <b>Appendices</b>        |                      |                                                                      |     |
| 42 |                          |                      |                                                                      |     |
| 43 | Informed consent         | <a href="#">#32</a>  | Model consent form and other related documentation given to          | 4   |
| 44 | materials                |                      | participants and authorised surrogates                               |     |
| 45 |                          |                      |                                                                      |     |
| 46 |                          |                      |                                                                      |     |
| 47 | Biological specimens     | <a href="#">#33</a>  | Plans for collection, laboratory evaluation, and storage of          | n/a |
| 48 |                          |                      | biological specimens for genetic or molecular analysis in the        |     |
| 49 |                          |                      | current trial and for future use in ancillary studies, if applicable |     |
| 50 |                          |                      |                                                                      |     |
| 51 |                          |                      |                                                                      |     |

The SPIRIT checklist is distributed under the terms of the Creative Commons Attribution License CC-BY-ND 3.0. This checklist was completed on 09. September 2019 using <https://www.goodreports.org/>, a tool made by the [EQUATOR Network](#) in collaboration with [Penelope.ai](#)

# BMJ Open

## Triple-arm trial of pH (Tri-pH) effect on live birth after ICSI in Egyptian IVF facilities: Protocol of a randomised controlled trial

|                                 |                                                                                                                                                                                                                                                                                                                                                                                                                                                                                                                                                                                                                                                                                                                                                   |
|---------------------------------|---------------------------------------------------------------------------------------------------------------------------------------------------------------------------------------------------------------------------------------------------------------------------------------------------------------------------------------------------------------------------------------------------------------------------------------------------------------------------------------------------------------------------------------------------------------------------------------------------------------------------------------------------------------------------------------------------------------------------------------------------|
| Journal:                        | <i>BMJ Open</i>                                                                                                                                                                                                                                                                                                                                                                                                                                                                                                                                                                                                                                                                                                                                   |
| Manuscript ID                   | bmjopen-2019-034194.R5                                                                                                                                                                                                                                                                                                                                                                                                                                                                                                                                                                                                                                                                                                                            |
| Article Type:                   | Protocol                                                                                                                                                                                                                                                                                                                                                                                                                                                                                                                                                                                                                                                                                                                                          |
| Date Submitted by the Author:   | 13-Jan-2020                                                                                                                                                                                                                                                                                                                                                                                                                                                                                                                                                                                                                                                                                                                                       |
| Complete List of Authors:       | Fawzy, Mohamed; IbnSina Hospital, Ibsina IVF Centre; Banon IVF Centre<br>Emad, Mai; IbnSina Hospital, Ibsina IVF Centre; Banon IVF Centre<br>Wilkinson, Jack; University of Manchester, Centre for Biostatistics; Salford Royal NHS Foundation Trust, Research and Development<br>Mansour, Ragaa; Egyptian IVF-ET Center<br>Mahran, Ali; Assiut University Faculty of Medicine, Department of Dermatology, Venereology and Andrology<br>Fetih, Ahmed; Assiut University Faculty of Medicine, Department of Obstetrics and Gynecology<br>Abdelrahman , Mohamed; Sohag University Faculty of Medicine, Department of Obstetrics and Gynecology<br>AbdelGhafar, Hazem; Sohag University Faculty of Medicine, Department of Obstetrics and Gynecology |
| <b>Primary Subject Heading</b>: | Obstetrics and gynaecology                                                                                                                                                                                                                                                                                                                                                                                                                                                                                                                                                                                                                                                                                                                        |
| Secondary Subject Heading:      | Reproductive medicine, Obstetrics and gynaecology                                                                                                                                                                                                                                                                                                                                                                                                                                                                                                                                                                                                                                                                                                 |
| Keywords:                       | Embryo culture, pH level, culture media, blastocyst formation                                                                                                                                                                                                                                                                                                                                                                                                                                                                                                                                                                                                                                                                                     |
|                                 |                                                                                                                                                                                                                                                                                                                                                                                                                                                                                                                                                                                                                                                                                                                                                   |

SCHOLARONE™  
Manuscripts



I, the Submitting Author has the right to grant and does grant on behalf of all authors of the Work (as defined in the below author licence), an exclusive licence and/or a non-exclusive licence for contributions from authors who are: i) UK Crown employees; ii) where BMJ has agreed a CC-BY licence shall apply, and/or iii) in accordance with the terms applicable for US Federal Government officers or employees acting as part of their official duties; on a worldwide, perpetual, irrevocable, royalty-free basis to BMJ Publishing Group Ltd ("BMJ") its licensees and where the relevant Journal is co-owned by BMJ to the co-owners of the Journal, to publish the Work in this journal and any other BMJ products and to exploit all rights, as set out in our [licence](#).

The Submitting Author accepts and understands that any supply made under these terms is made by BMJ to the Submitting Author unless you are acting as an employee on behalf of your employer or a postgraduate student of an affiliated institution which is paying any applicable article publishing charge ("APC") for Open Access articles. Where the Submitting Author wishes to make the Work available on an Open Access basis (and intends to pay the relevant APC), the terms of reuse of such Open Access shall be governed by a Creative Commons licence – details of these licences and which [Creative Commons](#) licence will apply to this Work are set out in our licence referred to above.

Other than as permitted in any relevant BMJ Author's Self Archiving Policies, I confirm this Work has not been accepted for publication elsewhere, is not being considered for publication elsewhere and does not duplicate material already published. I confirm all authors consent to publication of this Work and authorise the granting of this licence.

## pH-Study Protocol

**Title: Triple-arm trial of pH (Tri-pH) effect on live birth after ICSI in Egyptian IVF facilities: Protocol of a randomised controlled trial**

Mohamed Fawzy,<sup>ab</sup> Mai Emad,<sup>ab</sup> Jack Wilkinson,<sup>c</sup> Ragaa Mansour,<sup>d</sup> Ali Mahran,<sup>d</sup> Ahmed N. Fetih,<sup>f</sup> Mohamed Y. AbdelRahman,<sup>g</sup> Hazem Abdelghafar,<sup>g</sup>

*IbnSina IVF Centre, Sohag and Banon IVF Centre, Assuit, Egypt*

<sup>a</sup>IbnSina IVF Centre, IbnSina Hospital, Sohag, Egypt; <sup>b</sup>Banon IVF Centre, Assiut, Egypt;

<sup>c</sup>Centre for Biostatistics, University of Manchester, UK; <sup>d</sup>Egyptian IVF-ET Centre, Cairo,

Egypt; <sup>e</sup>Department of Dermatology, Venereology and Andrology, Faculty of Medicine,

Assiut University, Egypt; <sup>f</sup>Department of Obstetrics and Gynecology, Faculty of Medicine,

Assiut University, Egypt; <sup>g</sup>Department of Obstetrics and Gynecology, Faculty of Medicine,

Sohag University, Egypt

Corresponding Author: Dr. Mohamed Fawzy, IVF Laboratory Director (IbnSina and Banon

IVF Centres), IbnSina Hospital, 146 El Aref Square, Sohag, Egypt; Cell: +201011122286; E-

mail: [drfawzy001@me.com](mailto:drfawzy001@me.com)

## Abstract

### Introduction

One potential stressor that can affect pre- and post-implantation embryonic growth after in vitro fertilisation (IVF) is the pH of the human embryo culture medium, but no evidence exists to indicate which pH level is optimal for IVF. Based on anecdotal evidence or mouse models, culture media manufacturers recommend a pH range of 7.2 to 7.4, and IVF laboratories routinely use a pH range of 7.25 to 7.3. Given the lack of randomised trials evaluating the effect of pH on live birth rate after IVF, this trial examines the effect of three different pH levels on the live birth rate.

### Methods and analysis

This multicentre randomised trial will involve centres specialised in IVF in Egypt. Eligible couples for intracytoplasmic sperm injection (ICSI) will be randomised for embryo culture at pH 7.2, 7.3, or 7.4. The study is designed to detect 10 percentage points difference in live birth rate between the best and worst performing media with 93% power at a 1% significance level. The primary outcome is the rate of live birth (delivery of one or more viable infants beyond the 20<sup>th</sup> week of gestation) after ICSI. Secondary clinical outcomes include biochemical pregnancy, clinical pregnancy, ongoing pregnancy, miscarriage, preterm births, birth weight, stillbirth, congenital malformation, and cumulative live birth (within one year from randomisation). Embryo development outcomes include fertilisation, blastocyst formation and quality, and embryo cryopreservation and utilisation.

### Ethics and dissemination

The study was reviewed and approved by the Ethics Review Boards of the participating centres. Eligible women will sign a written informed consent before enrolment. This study has an independent data monitoring and safety committee comprised of international experts

1  
2  
3 in trial design and *in vitro* culture. No plan exists to disseminate results to participants or  
4  
5 health communities, except for the independent monitoring and safety committee of the trial.

6  
7  
8 **Trial registration number** NCT02896777.

9  
10 **Keywords**

11  
12 Embryo culture, pH level, culture media, blastocyst formation

13  
14  
15 **Strengths and limitations of this study**

- 16  
17  
18  
19  
20  
21  
22  
23  
24  
25  
26  
27  
28  
29  
30  
31  
32  
33  
34  
35  
36  
37  
38  
39  
40  
41  
42  
43  
44  
45  
46  
47  
48  
49  
50  
51  
52  
53  
54  
55  
56  
57  
58  
59  
60
- The study is a randomised controlled trial, which reduces the possibility of bias.
  - The study has an independent data monitoring committee with full access to the data.
  - Limitations of this study include the inclusion of only ICSI cycles because ICSI is the preferred method of insemination in the participating centres, and that the calculation of blastocyst formation rate is based on an assumption for cleavage-stage transfer cycles.
  - The embryologists will be aware of the pH level as the study is being conducted.

33  
34  
35  
36  
37  
38  
39  
40  
41  
42  
43  
44  
45  
46  
47  
48  
49  
50  
51  
52  
53  
54  
55  
56  
57  
58  
59  
60

33  
34 **Background**

35  
36 Assisted reproductive techniques (ART) result in a cumulative live birth rate of around 65%  
37  
38 within six cycles of *in vitro* fertilisation (IVF),<sup>1</sup> which is relatively suboptimal. In addition,  
39  
40 IVF has been associated with adverse perinatal outcomes, such as preterm birth and low birth  
41  
42 weight babies compared with the *in vivo* conception.<sup>2</sup> These adverse consequences can be  
43  
44 due to a range of factors including patient demographics, ovarian stimulation, and the culture  
45  
46 system. In relation to embryo culture conditions, over 200 variables have been identified as  
47  
48 having effects on cycle outcome.<sup>3</sup> One element that may influence embryo development *in*  
49  
50 *vitro* is the culture medium pH, which thus far has been determined by manufacturers of  
51  
52 culture media without recourse to a well-powered randomised clinical trial (RCT).<sup>4</sup> pH levels  
53  
54 are potential stressors that vary between media brands and from batch-to-batch depending on  
55  
56 the levels of bicarbonate in the culture media and of CO<sub>2</sub> in incubators.<sup>5</sup> Hence, pH levels can  
57  
58  
59  
60

1  
2  
3 vary between incubators within a laboratory. Recommendations for the frequency of pH  
4  
5 measurement for embryo culture vary from daily to monthly.<sup>4</sup>  
6

7  
8 The intracellular pH (pHi) of oocytes and embryos is modulated by the extracellular pH  
9  
10 (pHe),<sup>6</sup> which is affected by the culture conditions, including the concentrations of  
11  
12 bicarbonate, protein, and amino acids in culture media, and of the CO<sub>2</sub> in incubators.<sup>7</sup> The  
13  
14 mechanism of pHi in oocytes and embryos is complex, regulating enzymatic activity, cell  
15  
16 division and differentiation, protein synthesis, metabolism, mitochondrial function,  
17  
18 cytoskeletal regulation, and microtubule dynamics.<sup>7,8</sup> Drifts in pHe translate into changes in  
19  
20 pHi, which can adversely affect cell function if compensatory mechanisms fail to restore pHi  
21  
22 to a safe level.<sup>8</sup> These compensatory mechanisms include an active exchange among Na<sup>+</sup>,  
23  
24 HCO<sub>3</sub><sup>-</sup>/Cl<sup>-</sup> and Na<sup>+</sup>/H<sup>+</sup> to maintain pHi between 7 to 7.3.<sup>5,8</sup> Oocytes that have been denuded  
25  
26 of their surrounding corona and cumulus cells prior to insemination via ICSI, as well as  
27  
28 vitrified-warmed embryos, lack robust compensatory mechanisms for maintenance of pHi;  
29  
30 therefore, drastic differences between pHe and pHi in these cases can disrupt embryo  
31  
32 development.<sup>9-11</sup>  
33  
34  
35  
36

37  
38 That being said, the optimal pH level to support human embryo development *in vitro* is still  
39  
40 undefined.<sup>4,9,12-15</sup> Current recommendations are based on results derived using mouse models  
41  
42 and/or literature from culture medium manufacturers. Theoretically, a wide range of pHe  
43  
44 levels (7.0–7.5) could support human embryo development *in vitro*, but a narrower range of  
45  
46 pHe levels (7.2 to 7.4) is used in clinical practice. This is because a more acidic pHe ( $\leq 7$ )  
47  
48 can adversely affect the oocyte spindle, delaying or even blocking embryo development *in*  
49  
50 *vitro*.<sup>4</sup> Alkaline levels of pHe ( $\geq 7.5$ ) can similarly harm oocytes and embryos.<sup>4</sup> Although  
51  
52 these reports of the effects of extreme pHe levels rely on animal models, underpowered  
53  
54 studies, or anecdotal beliefs, we have decided to limit our investigation to the range of pHe  
55  
56 used in clinical practice (7.2 to 7.4) as the safer alternative. Despite the routine use of pHe 7.2  
57  
58  
59  
60

1  
2  
3 to 7.4 in clinical practice, there is no clear evidence as to whether there is a level within this  
4  
5 range that could better support human embryo development to result in a live birth. The aim  
6  
7 of this multicentre, randomised, clinical trial is to identify whether pHe 7.2, 7.3, or 7.4 results  
8  
9 in an improved live birth rate after ICSI in order to investigate the potential for optimisation.  
10  
11

## 12 **Methods and Design**

13  
14 This is a protocol of a multicentre, randomised, triple-arm, triple-blind clinical trial  
15  
16 (NCT02896777, registered at [www.ClinicalTrials.gov](http://www.ClinicalTrials.gov)) that will compare the effect of three  
17  
18 pH levels for human embryo culture *in vitro* on live birth after ICSI (Figure 1). In this  
19  
20 partially blind design, the clinicians, participants and outcome assessor will be unaware of the  
21  
22 study arms, but the embryologists will be aware. This multicentre trial will involve private  
23  
24 IVF facilities in Egypt (Ibnsina IVF Centre, Egyptian IVF-ET centre, Banon IVF Centre,  
25  
26 Qena IVF Centre and Amshaj IVF Centre) which will all have the study protocol prior to  
27  
28 enrolment of participants. If other IVF facilities join this trial before recruitment, this will be  
29  
30 reported in the study.  
31  
32  
33  
34

## 35 **Intervention**

36  
37 In each arm of the trial, which will only include intracytoplasmic sperm injection (ICSI)  
38  
39 cycles, oocytes and embryos will undergo continuous culture from day 0 through day 5 or 6  
40  
41 without medium renewal. The oocytes and resulting embryos after ICSI will be cultured in  
42  
43 either pHe  $7.2 \pm 0.02$  ("Arm I"), pHe  $7.3 \pm 0.02$  ("Arm II"), or pHe  $7.4 \pm 0.02$  ("Arm III").  
44  
45  
46

## 47 **Patient and Public Involvement**

48  
49 Patients have not been directly involved in the design, planning, and conception of this trial.  
50  
51

## 52 **Randomisation and Masking**

53  
54 Using an online tool, participants will be randomised to the experimental arms with a 1:1:1  
55  
56 allocation ratio. The allocation sequence of participants will be generated using a permuted  
57  
58 block randomisation of 3, 6 and 9 block sizes with unique identifiers in random order,  
59  
60



1  
2  
3 stratified by trial site. Randomisation of participants and storage of the results in sequentially  
4 numbered, opaque, sealed envelopes will be performed by a secretary with no involvement in  
5 patient care, and the sealed envelopes will be provided to trial sites before enrolment of the  
6 first participant. Eligible participants will be allocated to the relevant arms on the day of  
7 maturation trigger and the allocation result will be communicated to the laboratory team.  
8  
9  
10  
11  
12  
13  
14  
15  
16  
17  
18  
19  
20  
21  
22  
23  
24  
25  
26  
27  
28  
29  
30  
31  
32  
33  
34  
35  
36  
37  
38  
39  
40  
41  
42  
43  
44  
45  
46  
47  
48  
49  
50  
51  
52  
53  
54  
55  
56  
57  
58  
59  
60

Participants, clinicians and outcome assessors for the clinical outcomes will be unaware of the allocation, while embryologists who will assess embryo development will be aware of the allocation.

### **Participants**

The inclusion criteria include:

- 1) Women age of  $\geq 18$  to  $\leq 40$ ;
- 2) BMI of  $\leq 31$ ;
- 3) Anticipated normal responder ( $\geq 5$  antral follicle count or  $\geq 5.4$  pmol/L AMH);
- 4) Women with  $\geq 1$  year of primary or secondary infertility;
- 5) Fresh ejaculate sperm of any count provided that there is  $\geq 1\%$  normal forms with any motile fraction;
- 6) Women undergoing their first ICSI cycle or their second ICSI cycle after a previously successful treatment;
- 7) Women with  $> 7$  mm endometrial thickness at day of maturation trigger; and
- 8) Women with no detected uterine abnormality on transvaginal ultrasound (e.g. submucosal myomas, polyps or septa).

***Women will be excluded if they have:***

- 1) Unilateral oophorectomy;
- 2) Abnormal karyotyping for them or their male partners;
- 3) History of repeated abortions or implantation failure;

- 4) Uncontrolled diabetes;
- 5) Liver or renal disease;
- 6) History of severe ovarian hyperstimulation;
- 7) History of malignancy or borderline pathology;
- 8) Endometriosis;
- 9) Plan for PGD-A;
- 10) Severe male factor includes surgical sperm retrieval or cryopreserved sperm; or
- 11) PCOS, women with history of severe OHSS, and cycles with agonist trigger or any patient with a plan for a “freeze-all”.

### **Stimulation Protocol, Oocyte retrieval, and Luteal Phase Support**

Women will undergo controlled ovarian stimulation with agonist mid-luteal pituitary down-regulation (Decapeptyl® 0.1mg, Ferring, Switzerland) or antagonist (Cetrotide® 0.25 mg, Merck Serono) protocols. Agonist will start on day 19–21 of the preceding cycle and will continue through the day of maturation trigger. In the antagonist protocol, women will start the antagonist on stimulation day 6 of the treatment cycle. Women will begin follicular stimulating hormone (rFSH; Gonal-F, Merck Serono) and human menopausal gonadotropin (HMG; Menogon, Ferring) at 150-300 IU with a 2:1 ratio from cycle day 2 through maturation, with dosage adjustment according to ovarian response. When  $\geq 3$  follicles measure  $\geq 18$  mm mean diameter on ultrasound, women will be given a 10,000 IU hCG trigger shot (Choriomon, IBSA) for oocyte maturation. Oocyte retrieval will be performed 37 hours after hCG trigger under transvaginal sonographic guidance. Follicular aspirates will be handled in HEPES-buffered medium (global® HEPES, LifeGlobal, Canada) at 37°C using tube warmers. Luteal-phase support will be achieved with intramuscular progesterone (100 mg/mL [Prontogest, IBSA]) once daily or vaginal pessaries (400 mg Prontogest) twice daily,

1  
2  
3 starting on day 1 after retrieval (“day 1”) to 12 weeks of gestation, if a pregnancy is  
4  
5 established.  
6

### 7 **Sperm Preparation, Oocyte Denudation and ICSI**

8  
9  
10 Semen samples will be processed using density gradient centrifugation<sup>16</sup> (Puresperm,  
11  
12 Nidacon, Sweden). The pellet will undergo once washing and incubation at room temperature  
13  
14 in HEPES buffered medium (AllGrade Wash, LifeGlobal). Denudation of oocytes will occur  
15  
16 immediately after collection in 40 IU hyaluronidase (LifeGlobal, Canada) diluted in Global  
17  
18 HEPES using a 170-micrometre stripper (Cook, US). Metaphase II (MII) oocytes will  
19  
20 undergo ICSI in Global HEPES medium under an inverted microscope as previously  
21  
22 described.<sup>17</sup>  
23  
24  
25

### 26 **Incubator Management and pH Adjustment**

27  
28 We will use only humidified benchtop incubators for this study, involving Labo C-Top  
29  
30 (Labotect, Germany), Minc-1000 (Cook, US), and AD-3100 (Astec, Japan). Each centre will  
31  
32 use only one brand to account for incubators as a variable. It is possible that dry incubators  
33  
34 such as ESCO (Esco Micro Pte. Ltd, Singapore) are used in some centres, but we note that  
35  
36 our analysis will account for differences between centres by adjusting for trial sites.  
37  
38

39  
40 Incubators will undergo stringent control of temperature ( $36.9\pm 0.1^{\circ}\text{C}$ ) by daily validation  
41  
42 using certified thermometers. Incubator  $\text{CO}_2$  and  $\text{O}_2$  levels will be measured daily using a  
43  
44 certified gas analyser to ensure that  $\text{O}_2$  measures 5%, and  $\text{CO}_2$  concentration is at the  
45  
46 prespecified level to achieve the required pH. Well-trained persons across the sites will verify  
47  
48 all measurements (temperature,  $\text{CO}_2$ ,  $\text{O}_2$ , and pH levels). Incubators will be sterilised by 6%  
49  
50  $\text{H}_2\text{O}_2$  every four weeks, along with the installation of a new set of inline filters (Green,  
51  
52 Lifeglobal, CooperSurgical).<sup>18</sup>  
53  
54

55  
56 A minimum of 3 incubators of a single brand within each facility is obligatory to represent  
57  
58 the three pH arms:  $7.2\pm 0.02$  pH level (Incubator A),  $7.3\pm 0.02$  pH level (Incubator B), and  
59  
60

1  
2  
3 7.4±0.02 level (Incubator C). The three incubators will undergo strict adjustments to maintain  
4  
5 the required pH using a handheld blood gas analyser (Epoc® Reader and Host; BGEM card  
6  
7 US). Constant pH levels will be ensured by a twice-weekly measurement of pH using the  
8  
9 blood gas analyser along with daily measurement of CO<sub>2</sub> levels of incubators. Measurement  
10  
11 of pH will occur following overnight incubation of 1 mL culture media in a central well dish  
12  
13 covered with 0.4 mL oil. Before the opening of incubators, the handheld blood gas analyser  
14  
15 (Epoc® Reader and Host; BGEM card US) will be prepared for pH measurement as per the  
16  
17 manufacturer's protocol. Briefly, after switching on the device, the temperature will be set at  
18  
19 37°C, sample type set as arterial, and automatic calibration will be initiated. When the device  
20  
21 is ready, 0.5 mL calibrated culture media will be aspirated using a 1 mL syringe attached to a  
22  
23 wide calibre needle. The first droplet will be discarded and the remainder of the sample  
24  
25 injected into the device, for the assessment of pH, and partial pressures of CO<sub>2</sub> and O<sub>2</sub>. In  
26  
27 each laboratory, the partial pressures of CO<sub>2</sub> and O<sub>2</sub> will be compared with those on the  
28  
29 incubator display. The pH levels will be measured with every new batch of culture media.  
30  
31 Measurements of pH and CO<sub>2</sub> across centres will be performed using the same brand of  
32  
33 equipment with periodic calibration. To account for errors in measurement, one well-trained  
34  
35 staff member will be assigned to measure the pH and double-check the CO<sub>2</sub> level across trial  
36  
37 sites.  
38  
39  
40  
41  
42  
43

#### 44 **Culture Protocol and Embryo Scoring**

45  
46 Each culture dish (micro-droplet, Vitrolife) will hold 12 × 20 µl droplets of Global Total  
47  
48 culture medium (Lifeglobal, CooperSurgical, US) overlaid with 5 ml oil (NidOil, Nidacon).  
49  
50 If there is a decision to change culture media at any time during the study, this will be  
51  
52 performed at the same time across study sites. Dishes will be incubated overnight in the  
53  
54 relevant incubator adjusted to the proper pH as per randomisation. After ICSI, the injected  
55  
56 oocytes will undergo washing in culture medium followed by incubation from day 0 through  
57  
58  
59  
60

1  
2  
3 day 5 or 6 in the relevant pH arm, except for a small portion of embryos transferred on day 3.  
4  
5 The inseminated oocytes will undergo culture in groups of 3 each from days 0 to 5 or 6, with  
6  
7 the removal of the unfertilised, abnormally fertilised or degenerated oocytes at fertilisation  
8  
9 check. Two embryologists will perform the fertilisation check and embryo grading on day 1,  
10  
11 2, 3, and 5 of culture as per the Istanbul Consensus.<sup>19</sup> All laboratories will vitrify embryos no  
12  
13 earlier than day 5. Embryos will be suitable for transfer or vitrification on day 5 provided  
14  
15 they are graded 3 1 1 as per the Istanbul Consensus.<sup>19</sup> Images of embryos utilised for transfer  
16  
17 or cryopreservation will be recorded in the patient file. All the images from all centres will  
18  
19 undergo blind grading by two independent, experienced embryologists.  
20  
21  
22

### 23 **Embryo Transfer**

24  
25 One to two embryos will be transferred per cycle. Women with a reduced uterine cavity or  
26  
27 previous preterm birth will receive only one embryo. Trial sites will transfer blastocysts on  
28  
29 day 5 except for one participating site that will transfer embryos on day 3. This issue will be  
30  
31 accounted for by adjusting the analysis by trial site. Embryos will be transferred under  
32  
33 sonographic guidance using the Sydney IVF Transfer Set (Cook, US) as per the standard  
34  
35 transfer protocol in each site. Any remaining utilisable embryos will be vitrified for transfer  
36  
37 in subsequent cycles as we plan to monitor the cumulative live birth rate from fresh and  
38  
39 vitrified-warmed transfers within one year from randomisation. Women will test the level of  
40  
41 serum hCG for biochemical pregnancy 14 days after oocyte retrieval and will confirm clinical  
42  
43 pregnancy at  $\geq$  week 7 of gestation by detection of intrauterine sacs with a heartbeat on the  
44  
45 ultrasound.  
46  
47  
48  
49

### 50 **Outcome Measures**

51  
52 Each outcome will be calculated including all randomised participants in the arms to which  
53  
54 they were allocated, with the exception of implantation rate, which will be interpreted  
55  
56 cautiously due to concerns over its validity as a measure of treatment effect, and perinatal  
57  
58  
59  
60

1  
2  
3 outcomes, which by definition are only available in the subset of participants achieving live  
4  
5 birth. This study will adopt the definitions of outcomes included in a forthcoming core  
6  
7 outcome set for infertility trials<sup>20</sup> where appropriate. This outcome set was developed by  
8  
9 means of an international consensus process involving clinicians, clinical scientists, patients  
10  
11 and researchers.  
12  
13

### 14 ***Primary outcome***

15  
16 Live birth (delivery of one or more viable infants beyond the 20<sup>th</sup> week of gestation).  
17  
18

### 19 ***Secondary outcomes***

20  
21 All secondary outcomes will be cautiously reported, since statistical significance has limited  
22  
23 meaning in the context of a plurality of tests.  
24  
25

- 26 1) Biochemical pregnancy (positive  $\beta$ hCG  $\geq$  10 IU/L at 14 days after egg retrieval).
- 27 2) Clinical pregnancy (registered sacs with a heartbeat on ultrasound  $>$  7<sup>th</sup> week of gestation).
- 28 3) Ongoing pregnancy (continued viable pregnancy  $>$  20<sup>th</sup> week of gestation).
- 29 4) Miscarriage (loss of a clinical pregnancy  $\leq$  20<sup>th</sup> week of gestation).
- 30 5) Term live-birth (i.e. delivery of one or more viable infants  $\geq$  37 weeks of gestation).
- 31 6) Preterm birth (delivery of one or more viable infants  $<$  37<sup>th</sup> week of gestation).
- 32 7) Very preterm birth (delivery of one or more viable infants  $<$  32<sup>nd</sup> week of gestation).
- 33 8) Low birth weight babies (babies weighing  $<$  2500 gm within 24 hours of delivery)
- 34 9) Congenital malformation (delivery of congenitally malformed babies).
- 35 10) Stillbirth (delivery of nonviable babies  $>$  20 weeks of gestation).
- 36 11) Cumulative live birth (registered viable neonates after one fresh plus one vitrified-  
37 warmed embryo transfer within one year of randomisation).
- 38 12) Fertilisation (presence of 2 pronuclei  $17\pm 1$  hr after ICSI).
- 39 13) Embryo cleavage (cleaved embryos per fertilised oocyte).
- 40  
41  
42  
43  
44  
45  
46  
47  
48  
49  
50  
51  
52  
53  
54  
55  
56  
57  
58  
59  
60

- 1  
2  
3 14) Top-quality embryos on day 3 (7-8 cells with appropriate sizes blastomeres and less than  
4  
5 10% fragmentation by volume).  
6  
7  
8 15) Blastocyst formation on day 5 or 6 (formed blastocysts per fertilised oocyte).  
9  
10 16) Top-quality blastocyst on day 5 (rounded and dense inner cell mass with many  
11  
12 trophoctodermal cells creating a connected zone and a blastocoel more than 100% by  
13  
14 volume;  $\geq 3$  1 1 grade per fertilised oocyte).  
15  
16  
17 17) Cryopreservation (cryopreserved embryos per fertilised oocyte).  
18  
19 18) Live-birth-implantation rate (live birth per embryo transferred).  
20  
21 19) Utilised embryos (number of cryopreserved plus transferred embryos per fertilised  
22  
23 oocyte).  
24  
25  
26 20) Top-quality utilised embryos (number of high-quality embryos transferred plus blastocyst  
27  
28 cryopreserved of 3 1 1 grade per fertilised oocyte).  
29

## 30 **Statistical Analysis**

### 31 ***Sample size estimation***

32  
33 This is a three-arm study looking at pH over a range of 7.2 to 7.4. The hypothesis to be tested  
34  
35 is that adjusting the pH value to the edges of this range might result in improvements to the  
36  
37 live birth rate, although we remain in equipoise as to whether higher or lower values will be  
38  
39 optimal. On the basis of internal data, live birth rates in the region of 25-35% are typical, and  
40  
41 our goal is to investigate whether this is associated with varying pH levels.  
42  
43  
44  
45

46  
47 The study has been powered for a global test of the effect of pH, calculated using plausible  
48  
49 birth rates in the three groups of 25%, 30%, and 35%. 646 participants per arm yield 98%  
50  
51 power in this scenario, using a 5% significance level. This test makes no assumption about  
52  
53 the ordering of the live birth rates in relation to the ordering of the pH values. The high-  
54  
55 power level has been adopted to allow for some leeway in relation to the minimum effect  
56  
57 size. For illustration, if the birth rates were slightly less distinct, with 26%, 30%, 33% (a  
58  
59  
60

1  
2  
3 spread of just seven percentage points) this sample size yields 85% power against a 5%  
4  
5 significance level, and 65% at a 1% significance level. We have also been conservative in our  
6  
7 inflation of numbers for dropout. We have allowed for 5% loss to follow up, inflating our  
8  
9 group size to 680. In reality, we will conduct the analysis on an intention to treat basis,  
10  
11 including all randomised women. Women who do not complete treatment (for example, they  
12  
13 do not undergo embryo transfer) will be counted as not having a live birth, and so do not  
14  
15 represent a reduction in sample size. The only exceptions to this will be participants who  
16  
17 withdraw consent for their data to be used in the study. Our inflation for loss to follow up  
18  
19 reflects this possibility. We also note that adjustment for site and age in the analysis will  
20  
21 increase power further.  
22  
23  
24  
25

### 26 *Analytical methods*

27  
28 The study will be conducted according to the intention-to-treat approach, where each  
29  
30 participant randomised will be included in the analysis, regardless of protocol deviation. The  
31  
32 primary analysis of live birth will be conducted using logistic regression, with live birth event  
33  
34 regressed on pH groups, adjusted for study site and participant age, which will be  
35  
36 standardised before being entered as a covariate. pH will be entered as a categorical  
37  
38 covariate, allowing a Likelihood Ratio test of the association between pH and live birth rate  
39  
40 across the three groups to be performed. Secondary supportive analyses will be conducted to  
41  
42 try to characterise the nature of any association. This will include a test of a linear trend in  
43  
44 live birth rates across pH groups, which would imply an optimal pH level for the lowest or  
45  
46 highest value, as well as pairwise comparisons between each group (again, these analyses  
47  
48 will be adjusted for site and age). The pairwise comparisons will focus on size and precision  
49  
50 of the odds ratios. Although it would be desirable to power the study for all pairwise  
51  
52 comparisons as the primary outcome, this yields impracticable sample sizes (> 4000  
53  
54  
55  
56  
57  
58  
59  
60



1  
2  
3 participants) against realistic effects. The study has therefore been designed to represent the  
4  
5 most informative test of the hypothesis that pH level affects live birth, that is practicable.  
6  
7 For secondary outcomes, binary variables will be analysed in an analogous fashion to the  
8  
9 primary analysis. Count variables will be analysed using Poisson regression, with zero-  
10  
11 inflated models wherever the outcome is structurally undefined for some participants. Again,  
12  
13 these will be adjusted for site and age. In the analysis of the number of usable embryos,  
14  
15 implanted embryos arising from the day 3 transfer will be included as formed and good  
16  
17 quality blastocysts, while those that do not implant in this portion will be considered blocked  
18  
19 at day 3. Utilisable embryos will be calculated as the total number of transferred embryos and  
20  
21 formed blastocysts. A 1% significance level will be employed. Due to the short treatment  
22  
23 duration, it is anticipated that loss to follow up will be minimal (it is unusual for patients not  
24  
25 to return to clinic to have their embryos transferred, for example). However, if any loss does  
26  
27 occur, these participants will be analysed as having a negative status for the primary  
28  
29 outcome, unless consent to use data is withdrawn. The follow-up period is identified as one  
30  
31 year from randomisation of the last participant provided that all pregnant women have given  
32  
33 birth.  
34  
35  
36  
37  
38  
39

### 40 **Ethics and dissemination**

41  
42 The Ethics Review Board of the Upper Egypt IVF Network relating to the participating sites  
43  
44 approved this trial (Approval No. 009/2016). An independent safety and monitoring  
45  
46 committee formed of five experts in reproductive endocrinology, reproductive biology,  
47  
48 embryo culture, biostatistics and trial methodology will oversee the conduct of trial. All  
49  
50 participants will receive independent counselling from research instructors who are not  
51  
52 involved in patient care or laboratory work. Participants who agree to participate will sign a  
53  
54 written informed consent before enrolment. This study will be conducted in accordance with  
55  
56 the Declaration of Helsinki.<sup>21</sup> The trial reporting will be according to the CONSORT  
57  
58  
59  
60

1  
2  
3 statement.<sup>22</sup> No plan exists to amend this protocol and any amendments will require approval  
4  
5 of the safety committee, and will undergo detailed reporting on the trial registry and in the  
6  
7 final manuscript.  
8  
9

## 10 **Discussion**

11  
12 Given the lack of evidence for a superior pH level for human embryo culture and whether  
13  
14 the pH level could make a difference in live birth after IVF, a trial is warranted. This trial is  
15  
16 expected to fill the gap in this area, since at present embryologists must rely upon the  
17  
18 recommendations of culture media manufacturers rather than on a robust evidence base. This  
19  
20 trial is powered to a high level (>90%, with a 1% significance level) against clinically  
21  
22 important differences to minimize the risk for uninformative results. In the case of cleavage-  
23  
24 stage transfer, the calculation of formed blastocysts will be based on the assumption that  
25  
26 implanted embryos represent formed blastocysts, while any transferred embryos which fail to  
27  
28 implant will be counted as blocked at the cleavage stage. Although this definition will be  
29  
30 subject to some error, we believe it is a reasonable way to assess blastocyst formation without  
31  
32 excluding a portion of the data. This point will be further discussed when this trial is  
33  
34 reported. A large number of secondary outcomes will be measured and reported. This is  
35  
36 partially driven by adherence to a recently developed core outcome set for infertility trials,<sup>20</sup>  
37  
38 as well as by the inclusion of some embryological variables which might shed light on the  
39  
40 mechanism of any effects of pH levels. As is usual in clinical trials, Type 1 error is controlled  
41  
42 by the fact that the study inference will be based on the primary outcome variable, live birth.  
43  
44 Accordingly, we will interpret the results of secondary endpoints cautiously in the final  
45  
46 report, since these endpoints are not subject to Type 1 error control.  
47  
48  
49  
50  
51  
52

## 53 **Funding and conflict of interest**

54  
55 The study receives no funding and the authors have no conflict of interest to declare.  
56  
57  
58  
59  
60

## Authors' contributions

Mohamed Fawzy is the creator of the concept and design of the study, and is the principal investigator of the study. Mohamed Fawzy is also a supervisor for the conduct of the study across the sites and will ensure that data is periodically sent for storage in an independent database. Jack Wilkinson is the statistician of the study who revised the study design and calculated the sample size and power of the study and he will be responsible for the data analysis and data transfer to the independent safety and monitoring committee. Mai Emad is a primary investigator at Banon IVF centre and a sub-investigator at Ibsina Centre, and she participated in revising the trial protocol and will participate in trial reporting thereafter. Ragaa Mansour is a primary investigator at the Egyptian IVF-ET Centre, and revised the trial protocol and provided advice during the protocol design. Ali Mahran is the andrologist of the study who will ensure all male partners meet the inclusion criteria, and revised the protocol and provided comments. Ahmed Fetih is a primary investigator at Banon IVF Centre and participated revising the protocol and provided comments. Mohamed AbdelRahman participated in the trial design and is a primary investigator at Amshaj IVF Centre. Hazem Abdelghafar is a primary investigator at Ibsina IVF Centre and participated in the trial design. All authors provided comments and agreed on the study design and protocol, and will participate in reporting this trial hereafter.

## References

1. Smith A, Tilling K, Nelson SM, et al. Live-Birth Rate Associated With Repeat In Vitro Fertilization Treatment Cycles. *JAMA* 2015;314(24):2654-62. doi: 10.1001/jama.2015.17296 [published Online First: 2015/12/31]
2. Berntsen S, Söderström-Anttila V, Wennerholm U-B, et al. The health of children conceived by ART: 'the chicken or the egg?'. *Human Reproduction Update* 2019;25(2):137-58. doi: 10.1093/humupd/dmz001
3. Pool TB, Schoolfield J, Han D. Human embryo culture media comparisons. *Methods Mol Biol* 2012;912:367-86. doi: 10.1007/978-1-61779-971-6\_21 [published Online First: 2012/07/26]
4. Swain JE. Is there an optimal pH for culture media used in clinical IVF? *Hum Reprod Update* 2012;18(3):333-9. doi: 10.1093/humupd/dmr053 [published Online First: 2012/02/09]

- 1  
2  
3 5. Tarahomi M, de Melker AA, van Wely M, et al. pH stability of human preimplantation  
4 embryo culture media: effects of culture and batches. *Reprod Biomed Online*  
5 2018;37(4):409-14. doi: 10.1016/j.rbmo.2018.08.011 [published Online First:  
6 2018/09/20]
- 7  
8 6. Shalgi R, Kraicer PF, Soferman N. Gases and electrolytes of human follicular fluid. *J*  
9 *Reprod Fertil* 1972;28(3):335-40. [published Online First: 1972/03/01]
- 10  
11 7. Phillips KP, Leveille MC, Claman P, et al. Intracellular pH regulation in human  
12 preimplantation embryos. *Hum Reprod* 2000;15(4):896-904. doi:  
13 10.1093/humrep/15.4.896 [published Online First: 2000/03/31]
- 14  
15 8. FitzHarris G, Siyanov V, Baltz JM. Granulosa cells regulate oocyte intracellular pH  
16 against acidosis in preantral follicles by multiple mechanisms. *Development*  
17 2007;134(23):4283-95. doi: 10.1242/dev.005272 [published Online First: 2007/11/06]
- 18  
19 9. Dale B, Menezo Y, Cohen J, et al. Intracellular pH regulation in the human oocyte. *Hum*  
20 *Reprod* 1998;13(4):964-70. doi: 10.1093/humrep/13.4.964 [published Online First:  
21 1998/06/10]
- 22  
23 10. Lane M, Baltz JM, Bavister BD. Na<sup>+</sup>/H<sup>+</sup> antiporter activity in hamster embryos is  
24 activated during fertilization. *Dev Biol* 1999;208(1):244-52. doi:  
25 10.1006/dbio.1999.9198 [published Online First: 1999/03/17]
- 26  
27 11. Swain JE, Pool TB. New pH-buffering system for media utilized during gamete and  
28 embryo manipulations for assisted reproduction. *Reprod Biomed Online*  
29 2009;18(6):799-810. [published Online First: 2009/06/06]
- 30  
31 12. Hentemann M, Mousavi K, Bertheussen K. Differential pH in embryo culture. *Fertil*  
32 *Steril* 2011;95(4):1291-4. doi: 10.1016/j.fertnstert.2010.10.018 [published Online  
33 First: 2010/11/12]
- 34  
35 13. Carney EW, Bavister BD. Regulation of hamster embryo development in vitro by carbon  
36 dioxide. *Biol Reprod* 1987;36(5):1155-63. doi: 10.1095/biolreprod36.5.1155  
37 [published Online First: 1987/06/01]
- 38  
39 14. Edwards LJ, Williams DA, Gardner DK. Intracellular pH of the mouse preimplantation  
40 embryo: amino acids act as buffers of intracellular pH. *Hum Reprod*  
41 1998;13(12):3441-8. doi: 10.1093/humrep/13.12.3441 [published Online First:  
42 1999/01/14]
- 43  
44 15. Edwards LJ, Williams DA, Gardner DK. Intracellular pH of the preimplantation mouse  
45 embryo: effects of extracellular pH and weak acids. *Mol Reprod Dev* 1998;50(4):434-  
46 42. doi: 10.1002/(SICI)1098-2795(199808)50:4<434::AID-MRD7>3.0.CO;2-J  
47 [published Online First: 1998/07/21]
- 48  
49 16. World Health Organization. WHO laboratory manual for the examination and processing  
50 of human semen. 5th ed. Geneva: World Health Organization 2010.
- 51  
52 17. Palermo G, Joris H, Devroey P, et al. Pregnancies after intracytoplasmic injection of  
53 single spermatozoon into an oocyte. *Lancet* 1992;340(8810):17-8. doi: 10.1016/0140-  
54 6736(92)92425-f [published Online First: 1992/07/04]
- 55  
56 18. Mortimer D, Cohen J, Mortimer ST, et al. Cairo consensus on the IVF laboratory  
57 environment and air quality: report of an expert meeting. *Reprod Biomed Online*  
58 2018;36(6):658-74. doi: 10.1016/j.rbmo.2018.02.005 [published Online First:  
59 2018/04/17]
- 60  
61 19. Medicine ASIR, Embryology ESIG. Istanbul consensus workshop on embryo assessment:  
62 proceedings of an expert meeting. *Reprod Biomed Online* 2011;22(6):632-46. doi:  
63 10.1016/j.rbmo.2011.02.001 [published Online First: 2011/04/13]
- 64  
65 20. Duffy JMN, Bhattacharya S, Curtis C, et al. A protocol developing, disseminating and  
66 implementing a core outcome set for infertility. *Hum Reprod Open*

- 1  
2  
3 2018;2018(3):hoy007. doi: 10.1093/hropen/hoy007 [published Online First:  
4 2019/03/22]  
5  
6 21. Williams JR. The Declaration of Helsinki and public health. *Bull World Health Organ*  
7 2008;86(8):650-2. doi: 10.2471/blt.08.050955 [published Online First: 2008/09/18]  
8 22. Schulz KF, Altman DG, Moher D, et al. CONSORT 2010 statement: updated guidelines  
9 for reporting parallel group randomised trials. *BMJ* 2010;340:c332. doi:  
10 10.1136/bmj.c332 [published Online First: 2010/03/25]  
11  
12

13 Figure Legend: Trial plan for enrolment  
14  
15  
16  
17  
18  
19  
20  
21  
22  
23  
24  
25  
26  
27  
28  
29  
30  
31  
32  
33  
34  
35  
36  
37  
38  
39  
40  
41  
42  
43  
44  
45  
46  
47  
48  
49  
50  
51  
52  
53  
54  
55  
56  
57  
58  
59  
60

For peer review only

1  
2  
3  
4  
5  
6  
7  
8  
9  
10  
11  
12  
13  
14  
15  
16  
17  
18  
19  
20  
21  
22  
23  
24  
25  
26  
27  
28  
29  
30  
31  
32  
33  
34  
35  
36  
37  
38  
39  
40  
41  
42  
43  
44  
45  
46  
47  
48  
49  
50  
51  
52  
53  
54  
55  
56  
57  
58  
59  
60

Couples will receive detailed information on the possible risks and potential benefits.

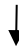

Couples with primary acceptance will be randomized to the three pH arms of the study

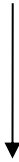

Randomization will occur to assign ~ 2100 participants to undergo day-5 fresh embryo-transfer utilizing the blastocysts developed in the either 7.2, 7.3 or 7.4 pH levels.

**Women randomization**

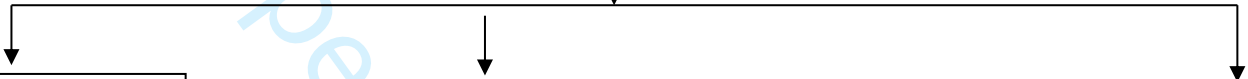

~ 700 participants will be randomized to undergo embryo culture in 7.2 pH level for 5 to 6 days and will receive fresh embryo transfer from this arm.

~ 700 participants will be randomized to undergo embryo culture in 7.3 pH level for 5 to 6 days and will receive fresh embryo transfer from this arm.

~ 700 participants will be randomized to undergo embryo culture in 7.4 pH level for 5 to 6 days and will receive fresh embryo transfer from this arm.

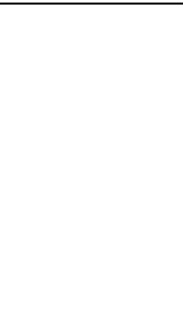

The intention-to-treat will include all randomized participants to 7.2 pH level group with the live birth rate as primary endpoint.

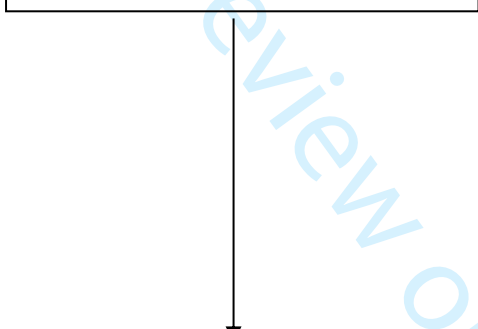

The intention-to-treat will include all randomized participants to 7.3 pH level group with the live birth rate as primary endpoint.

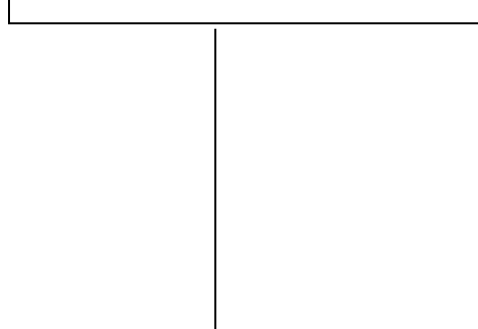

The intention-to-treat will include all randomized participants to 7.4 pH level group with the live birth rate as primary endpoint.

**pH trial plan for enrollment and outcomes – 7.2, 7.3 and 7.4 pH levels**

# Reporting checklist for protocol of a clinical trial.

Based on the SPIRIT guidelines.

## Instructions to authors

Complete this checklist by entering the page numbers from your manuscript where readers will find each of the items listed below.

Your article may not currently address all the items on the checklist. Please modify your text to include the missing information. If you are certain that an item does not apply, please write "n/a" and provide a short explanation.

Upload your completed checklist as an extra file when you submit to a journal.

In your methods section, say that you used the SPIRIT reporting guidelines, and cite them as:

Chan A-W, Tetzlaff JM, Altman DG, Laupacis A, Gøtzsche PC, Krleža-Jerić K, Hróbjartsson A, Mann H, Dickersin K, Berlin J, Doré C, Parulekar W, Summerskill W, Groves T, Schulz K, Sox H, Rockhold FW, Rennie D, Moher D. SPIRIT 2013 Statement: Defining standard protocol items for clinical trials. *Ann Intern Med.* 2013;158(3):200-207

|                                             |                     | Reporting Item                                                                                               | Page Number |
|---------------------------------------------|---------------------|--------------------------------------------------------------------------------------------------------------|-------------|
| <b>Administrative information</b>           |                     |                                                                                                              |             |
| Title                                       | <a href="#">#1</a>  | Descriptive title identifying the study design, population, interventions, and, if applicable, trial acronym | 1           |
| Trial registration                          | <a href="#">#2a</a> | Trial identifier and registry name. If not yet registered, name of intended registry                         | 2           |
| Trial registration: data set                | <a href="#">#2b</a> | All items from the World Health Organization Trial Registration Data Set                                     | 4           |
| Protocol version                            | <a href="#">#3</a>  | Date and version identifier                                                                                  | 4           |
| Funding                                     | <a href="#">#4</a>  | Sources and types of financial, material, and other support                                                  | 13          |
| Roles and responsibilities: contributorship | <a href="#">#5a</a> | Names, affiliations, and roles of protocol contributors                                                      | 1           |

|    |                           |                     |                                                                    |       |
|----|---------------------------|---------------------|--------------------------------------------------------------------|-------|
| 1  | Roles and                 | <a href="#">#5b</a> | Name and contact information for the trial sponsor                 | 1     |
| 2  | responsibilities:         |                     |                                                                    |       |
| 3  | sponsor contact           |                     |                                                                    |       |
| 4  | information               |                     |                                                                    |       |
| 5  |                           |                     |                                                                    |       |
| 6  |                           |                     |                                                                    |       |
| 7  |                           |                     |                                                                    |       |
| 8  | Roles and                 | <a href="#">#5c</a> | Role of study sponsor and funders, if any, in study design;        | 13    |
| 9  | responsibilities:         |                     | collection, management, analysis, and interpretation of data;      |       |
| 10 | sponsor and funder        |                     | writing of the report; and the decision to submit the report for   |       |
| 11 |                           |                     | publication, including whether they will have ultimate authority   |       |
| 12 |                           |                     | over any of these activities                                       |       |
| 13 |                           |                     |                                                                    |       |
| 14 |                           |                     |                                                                    |       |
| 15 |                           |                     |                                                                    |       |
| 16 | Roles and                 | <a href="#">#5d</a> | Composition, roles, and responsibilities of the coordinating       | 4     |
| 17 | responsibilities:         |                     | centre, steering committee, endpoint adjudication committee,       |       |
| 18 | committees                |                     | data management team, and other individuals or groups              |       |
| 19 |                           |                     | overseeing the trial, if applicable (see Item 21a for data         |       |
| 20 |                           |                     | monitoring committee)                                              |       |
| 21 |                           |                     |                                                                    |       |
| 22 |                           |                     |                                                                    |       |
| 23 |                           |                     |                                                                    |       |
| 24 | <b>Introduction</b>       |                     |                                                                    |       |
| 25 |                           |                     |                                                                    |       |
| 26 |                           |                     |                                                                    |       |
| 27 | Background and            | <a href="#">#6a</a> | Description of research question and justification for undertaking | 2 & 3 |
| 28 | rationale                 |                     | the trial, including summary of relevant studies (published and    |       |
| 29 |                           |                     | unpublished) examining benefits and harms for each intervention    |       |
| 30 |                           |                     |                                                                    |       |
| 31 |                           |                     |                                                                    |       |
| 32 | Background and            | <a href="#">#6b</a> | Explanation for choice of comparators                              | 2 & 3 |
| 33 | rationale: choice of      |                     |                                                                    |       |
| 34 | comparators               |                     |                                                                    |       |
| 35 |                           |                     |                                                                    |       |
| 36 |                           |                     |                                                                    |       |
| 37 | Objectives                | <a href="#">#7</a>  | Specific objectives or hypotheses                                  | 3 & 4 |
| 38 |                           |                     |                                                                    |       |
| 39 |                           |                     |                                                                    |       |
| 40 | Trial design              | <a href="#">#8</a>  | Description of trial design including type of trial (eg, parallel  | 4     |
| 41 |                           |                     | group, crossover, factorial, single group), allocation ratio, and  |       |
| 42 |                           |                     | framework (eg, superiority, equivalence, non-inferiority,          |       |
| 43 |                           |                     | exploratory)                                                       |       |
| 44 |                           |                     |                                                                    |       |
| 45 |                           |                     |                                                                    |       |
| 46 | <b>Methods:</b>           |                     |                                                                    |       |
| 47 | <b>Participants,</b>      |                     |                                                                    |       |
| 48 | <b>interventions, and</b> |                     |                                                                    |       |
| 49 | <b>outcomes</b>           |                     |                                                                    |       |
| 50 |                           |                     |                                                                    |       |
| 51 |                           |                     |                                                                    |       |
| 52 |                           |                     |                                                                    |       |
| 53 | Study setting             | <a href="#">#9</a>  | Description of study settings (eg, community clinic, academic      | 4     |
| 54 |                           |                     | hospital) and list of countries where data will be collected.      |       |
| 55 |                           |                     | Reference to where list of study sites can be obtained             |       |
| 56 |                           |                     |                                                                    |       |
| 57 |                           |                     |                                                                    |       |
| 58 |                           |                     |                                                                    |       |
| 59 |                           |                     |                                                                    |       |
| 60 |                           |                     |                                                                    |       |



|    |                              |                      |                                                                                                                                                                                                                                                                                                                                                                                |         |
|----|------------------------------|----------------------|--------------------------------------------------------------------------------------------------------------------------------------------------------------------------------------------------------------------------------------------------------------------------------------------------------------------------------------------------------------------------------|---------|
| 1  | Eligibility criteria         | <a href="#">#10</a>  | Inclusion and exclusion criteria for participants. If applicable, eligibility criteria for study centres and individuals who will perform the interventions (eg, surgeons, psychotherapists)                                                                                                                                                                                   | 5 & 6   |
| 2  |                              |                      |                                                                                                                                                                                                                                                                                                                                                                                |         |
| 3  |                              |                      |                                                                                                                                                                                                                                                                                                                                                                                |         |
| 4  |                              |                      |                                                                                                                                                                                                                                                                                                                                                                                |         |
| 5  |                              |                      |                                                                                                                                                                                                                                                                                                                                                                                |         |
| 6  | Interventions:               | <a href="#">#11a</a> | Interventions for each group with sufficient detail to allow replication, including how and when they will be administered                                                                                                                                                                                                                                                     | 4 & 5   |
| 7  | description                  |                      |                                                                                                                                                                                                                                                                                                                                                                                |         |
| 8  |                              |                      |                                                                                                                                                                                                                                                                                                                                                                                |         |
| 9  |                              |                      |                                                                                                                                                                                                                                                                                                                                                                                |         |
| 10 | Interventions:               | <a href="#">#11b</a> | Criteria for discontinuing or modifying allocated interventions for a given trial participant (eg, drug dose change in response to harms, participant request, or improving / worsening disease)                                                                                                                                                                               | 4 & 5   |
| 11 | modifications                |                      |                                                                                                                                                                                                                                                                                                                                                                                |         |
| 12 |                              |                      |                                                                                                                                                                                                                                                                                                                                                                                |         |
| 13 |                              |                      |                                                                                                                                                                                                                                                                                                                                                                                |         |
| 14 |                              |                      |                                                                                                                                                                                                                                                                                                                                                                                |         |
| 15 | Interventions:               | <a href="#">#11c</a> | Strategies to improve adherence to intervention protocols, and any procedures for monitoring adherence (eg, drug tablet return; laboratory tests)                                                                                                                                                                                                                              | 4 & 5   |
| 16 | adherence                    |                      |                                                                                                                                                                                                                                                                                                                                                                                |         |
| 17 |                              |                      |                                                                                                                                                                                                                                                                                                                                                                                |         |
| 18 |                              |                      |                                                                                                                                                                                                                                                                                                                                                                                |         |
| 19 |                              |                      |                                                                                                                                                                                                                                                                                                                                                                                |         |
| 20 |                              |                      |                                                                                                                                                                                                                                                                                                                                                                                |         |
| 21 | Interventions:               | <a href="#">#11d</a> | Relevant concomitant care and interventions that are permitted or prohibited during the trial                                                                                                                                                                                                                                                                                  | 9       |
| 22 | concomitant care             |                      |                                                                                                                                                                                                                                                                                                                                                                                |         |
| 23 |                              |                      |                                                                                                                                                                                                                                                                                                                                                                                |         |
| 24 |                              |                      |                                                                                                                                                                                                                                                                                                                                                                                |         |
| 25 | Outcomes                     | <a href="#">#12</a>  | Primary, secondary, and other outcomes, including the specific measurement variable (eg, systolic blood pressure), analysis metric (eg, change from baseline, final value, time to event), method of aggregation (eg, median, proportion), and time point for each outcome. Explanation of the clinical relevance of chosen efficacy and harm outcomes is strongly recommended | 10 & 11 |
| 26 |                              |                      |                                                                                                                                                                                                                                                                                                                                                                                |         |
| 27 |                              |                      |                                                                                                                                                                                                                                                                                                                                                                                |         |
| 28 |                              |                      |                                                                                                                                                                                                                                                                                                                                                                                |         |
| 29 |                              |                      |                                                                                                                                                                                                                                                                                                                                                                                |         |
| 30 |                              |                      |                                                                                                                                                                                                                                                                                                                                                                                |         |
| 31 |                              |                      |                                                                                                                                                                                                                                                                                                                                                                                |         |
| 32 |                              |                      |                                                                                                                                                                                                                                                                                                                                                                                |         |
| 33 |                              |                      |                                                                                                                                                                                                                                                                                                                                                                                |         |
| 34 | Participant timeline         | <a href="#">#13</a>  | Time schedule of enrolment, interventions (including any run-ins and washouts), assessments, and visits for participants. A schematic diagram is highly recommended (see Figure)                                                                                                                                                                                               | 8       |
| 35 |                              |                      |                                                                                                                                                                                                                                                                                                                                                                                |         |
| 36 |                              |                      |                                                                                                                                                                                                                                                                                                                                                                                |         |
| 37 |                              |                      |                                                                                                                                                                                                                                                                                                                                                                                |         |
| 38 |                              |                      |                                                                                                                                                                                                                                                                                                                                                                                |         |
| 39 |                              |                      |                                                                                                                                                                                                                                                                                                                                                                                |         |
| 40 | Sample size                  | <a href="#">#14</a>  | Estimated number of participants needed to achieve study objectives and how it was determined, including clinical and statistical assumptions supporting any sample size calculations                                                                                                                                                                                          | 11 & 12 |
| 41 |                              |                      |                                                                                                                                                                                                                                                                                                                                                                                |         |
| 42 |                              |                      |                                                                                                                                                                                                                                                                                                                                                                                |         |
| 43 |                              |                      |                                                                                                                                                                                                                                                                                                                                                                                |         |
| 44 |                              |                      |                                                                                                                                                                                                                                                                                                                                                                                |         |
| 45 | Recruitment                  | <a href="#">#15</a>  | Strategies for achieving adequate participant enrolment to reach target sample size                                                                                                                                                                                                                                                                                            | 4       |
| 46 |                              |                      |                                                                                                                                                                                                                                                                                                                                                                                |         |
| 47 |                              |                      |                                                                                                                                                                                                                                                                                                                                                                                |         |
| 48 |                              |                      |                                                                                                                                                                                                                                                                                                                                                                                |         |
| 49 | <b>Methods: Assignment</b>   |                      |                                                                                                                                                                                                                                                                                                                                                                                |         |
| 50 | <b>of interventions (for</b> |                      |                                                                                                                                                                                                                                                                                                                                                                                |         |
| 51 | <b>controlled trials)</b>    |                      |                                                                                                                                                                                                                                                                                                                                                                                |         |
| 52 |                              |                      |                                                                                                                                                                                                                                                                                                                                                                                |         |
| 53 |                              |                      |                                                                                                                                                                                                                                                                                                                                                                                |         |
| 54 | Allocation: sequence         | <a href="#">#16a</a> | Method of generating the allocation sequence (eg, computer-generated random numbers), and list of any factors for stratification. To reduce predictability of a random sequence, details of any planned restriction (eg, blocking) should be                                                                                                                                   | 5       |
| 55 | generation                   |                      |                                                                                                                                                                                                                                                                                                                                                                                |         |
| 56 |                              |                      |                                                                                                                                                                                                                                                                                                                                                                                |         |
| 57 |                              |                      |                                                                                                                                                                                                                                                                                                                                                                                |         |
| 58 |                              |                      |                                                                                                                                                                                                                                                                                                                                                                                |         |
| 59 |                              |                      |                                                                                                                                                                                                                                                                                                                                                                                |         |
| 60 |                              |                      |                                                                                                                                                                                                                                                                                                                                                                                |         |

provided in a separate document that is unavailable to those who enrol participants or assign interventions

|    |                        |                      |                                                                     |
|----|------------------------|----------------------|---------------------------------------------------------------------|
| 1  |                        |                      |                                                                     |
| 2  |                        |                      |                                                                     |
| 3  |                        |                      |                                                                     |
| 4  | Allocation             | <a href="#">#16b</a> | Mechanism of implementing the allocation sequence (eg, central      |
| 5  | concealment            |                      | telephone; sequentially numbered, opaque, sealed envelopes),        |
| 6  |                        |                      | describing any steps to conceal the sequence until interventions    |
| 7  | mechanism              |                      | are assigned                                                        |
| 8  |                        |                      |                                                                     |
| 9  |                        |                      |                                                                     |
| 10 |                        |                      |                                                                     |
| 11 | Allocation:            | <a href="#">#16c</a> | Who will generate the allocation sequence, who will enrol           |
| 12 | implementation         |                      | participants, and who will assign participants to interventions     |
| 13 |                        |                      |                                                                     |
| 14 | Blinding (masking)     | <a href="#">#17a</a> | Who will be blinded after assignment to interventions (eg, trial    |
| 15 |                        |                      | participants, care providers, outcome assessors, data analysts),    |
| 16 |                        |                      | and how                                                             |
| 17 |                        |                      |                                                                     |
| 18 |                        |                      |                                                                     |
| 19 |                        |                      |                                                                     |
| 20 | Blinding (masking):    | <a href="#">#17b</a> | If blinded, circumstances under which unblinding is permissible,    |
| 21 | emergency unblinding   |                      | and procedure for revealing a participant's allocated intervention  |
| 22 |                        |                      | during the trial                                                    |
| 23 |                        |                      |                                                                     |
| 24 |                        |                      |                                                                     |
| 25 | <b>Methods: Data</b>   |                      |                                                                     |
| 26 | <b>collection,</b>     |                      |                                                                     |
| 27 | <b>management, and</b> |                      |                                                                     |
| 28 | <b>analysis</b>        |                      |                                                                     |
| 29 |                        |                      |                                                                     |
| 30 |                        |                      |                                                                     |
| 31 |                        |                      |                                                                     |
| 32 | Data collection plan   | <a href="#">#18a</a> | Plans for assessment and collection of outcome, baseline, and       |
| 33 |                        |                      | other trial data, including any related processes to promote data   |
| 34 |                        |                      | quality (eg, duplicate measurements, training of assessors) and a   |
| 35 |                        |                      | description of study instruments (eg, questionnaires, laboratory    |
| 36 |                        |                      | tests) along with their reliability and validity, if known.         |
| 37 |                        |                      | Reference to where data collection forms can be found, if not in    |
| 38 |                        |                      | the protocol                                                        |
| 39 |                        |                      |                                                                     |
| 40 |                        |                      |                                                                     |
| 41 |                        |                      |                                                                     |
| 42 |                        |                      |                                                                     |
| 43 | Data collection plan:  | <a href="#">#18b</a> | Plans to promote participant retention and complete follow-up,      |
| 44 | retention              |                      | including list of any outcome data to be collected for participants |
| 45 |                        |                      | who discontinue or deviate from intervention protocols              |
| 46 |                        |                      |                                                                     |
| 47 |                        |                      |                                                                     |
| 48 | Data management        | <a href="#">#19</a>  | Plans for data entry, coding, security, and storage, including any  |
| 49 |                        |                      | related processes to promote data quality (eg, double data entry;   |
| 50 |                        |                      | range checks for data values). Reference to where details of data   |
| 51 |                        |                      | management procedures can be found, if not in the protocol          |
| 52 |                        |                      |                                                                     |
| 53 |                        |                      |                                                                     |
| 54 |                        |                      |                                                                     |
| 55 | Statistics: outcomes   | <a href="#">#20a</a> | Statistical methods for analysing primary and secondary             |
| 56 |                        |                      | outcomes. Reference to where other details of the statistical       |
| 57 |                        |                      | analysis plan can be found, if not in the protocol                  |
| 58 |                        |                      |                                                                     |
| 59 |                        |                      |                                                                     |
| 60 |                        |                      |                                                                     |

|    |                            |                      |                                                                    |         |
|----|----------------------------|----------------------|--------------------------------------------------------------------|---------|
| 1  | Statistics: additional     | <a href="#">#20b</a> | Methods for any additional analyses (eg, subgroup and adjusted     | 11 & 12 |
| 2  | analyses                   |                      | analyses)                                                          |         |
| 3  |                            |                      |                                                                    |         |
| 4  | Statistics: analysis       | <a href="#">#20c</a> | Definition of analysis population relating to protocol non-        | 11 & 12 |
| 5  | population and missing     |                      | adherence (eg, as randomised analysis), and any statistical        |         |
| 6  | data                       |                      | methods to handle missing data (eg, multiple imputation)           |         |
| 7  |                            |                      |                                                                    |         |
| 8  |                            |                      |                                                                    |         |
| 9  |                            |                      |                                                                    |         |
| 10 | <b>Methods: Monitoring</b> |                      |                                                                    |         |
| 11 |                            |                      |                                                                    |         |
| 12 | Data monitoring:           | <a href="#">#21a</a> | Composition of data monitoring committee (DMC); summary of         | 4       |
| 13 | formal committee           |                      | its role and reporting structure; statement of whether it is       |         |
| 14 |                            |                      | independent from the sponsor and competing interests; and          |         |
| 15 |                            |                      | reference to where further details about its charter can be found, |         |
| 16 |                            |                      | if not in the protocol. Alternatively, an explanation of why a     |         |
| 17 |                            |                      | DMC is not needed                                                  |         |
| 18 |                            |                      |                                                                    |         |
| 19 |                            |                      |                                                                    |         |
| 20 |                            |                      |                                                                    |         |
| 21 |                            |                      |                                                                    |         |
| 22 | Data monitoring:           | <a href="#">#21b</a> | Description of any interim analyses and stopping guidelines,       | 4, 11 & |
| 23 | interim analysis           |                      | including who will have access to these interim results and make   | 12      |
| 24 |                            |                      | the final decision to terminate the trial                          |         |
| 25 |                            |                      |                                                                    |         |
| 26 |                            |                      |                                                                    |         |
| 27 | Harms                      | <a href="#">#22</a>  | Plans for collecting, assessing, reporting, and managing solicited | 4       |
| 28 |                            |                      | and spontaneously reported adverse events and other unintended     |         |
| 29 |                            |                      | effects of trial interventions or trial conduct                    |         |
| 30 |                            |                      |                                                                    |         |
| 31 |                            |                      |                                                                    |         |
| 32 |                            |                      |                                                                    |         |
| 33 | Auditing                   | <a href="#">#23</a>  | Frequency and procedures for auditing trial conduct, if any, and   | 4       |
| 34 |                            |                      | whether the process will be independent from investigators and     |         |
| 35 |                            |                      | the sponsor                                                        |         |
| 36 |                            |                      |                                                                    |         |
| 37 |                            |                      |                                                                    |         |
| 38 | <b>Ethics and</b>          |                      |                                                                    |         |
| 39 | <b>dissemination</b>       |                      |                                                                    |         |
| 40 |                            |                      |                                                                    |         |
| 41 |                            |                      |                                                                    |         |
| 42 | Research ethics            | <a href="#">#24</a>  | Plans for seeking research ethics committee / institutional review | 4       |
| 43 | approval                   |                      | board (REC / IRB) approval                                         |         |
| 44 |                            |                      |                                                                    |         |
| 45 |                            |                      |                                                                    |         |
| 46 | Protocol amendments        | <a href="#">#25</a>  | Plans for communicating important protocol modifications (eg,      | 4       |
| 47 |                            |                      | changes to eligibility criteria, outcomes, analyses) to relevant   |         |
| 48 |                            |                      | parties (eg, investigators, REC / IRBs, trial participants, trial  |         |
| 49 |                            |                      | registries, journals, regulators)                                  |         |
| 50 |                            |                      |                                                                    |         |
| 51 |                            |                      |                                                                    |         |
| 52 |                            |                      |                                                                    |         |
| 53 | Consent or assent          | <a href="#">#26a</a> | Who will obtain informed consent or assent from potential trial    | 4       |
| 54 |                            |                      | participants or authorised surrogates, and how (see Item 32)       |         |
| 55 |                            |                      |                                                                    |         |
| 56 |                            |                      |                                                                    |         |
| 57 |                            |                      |                                                                    |         |
| 58 |                            |                      |                                                                    |         |
| 59 |                            |                      |                                                                    |         |
| 60 |                            |                      |                                                                    |         |

|    |                          |                      |                                                                      |     |
|----|--------------------------|----------------------|----------------------------------------------------------------------|-----|
| 1  | Consent or assent:       | <a href="#">#26b</a> | Additional consent provisions for collection and use of              | 4   |
| 2  | ancillary studies        |                      | participant data and biological specimens in ancillary studies, if   |     |
| 3  |                          |                      | applicable                                                           |     |
| 4  |                          |                      |                                                                      |     |
| 5  |                          |                      |                                                                      |     |
| 6  | Confidentiality          | <a href="#">#27</a>  | How personal information about potential and enrolled                | 4   |
| 7  |                          |                      | participants will be collected, shared, and maintained in order to   |     |
| 8  |                          |                      | protect confidentiality before, during, and after the trial          |     |
| 9  |                          |                      |                                                                      |     |
| 10 |                          |                      |                                                                      |     |
| 11 | Declaration of interests | <a href="#">#28</a>  | Financial and other competing interests for principal investigators  | 13  |
| 12 |                          |                      | for the overall trial and each study site                            |     |
| 13 |                          |                      |                                                                      |     |
| 14 |                          |                      |                                                                      |     |
| 15 | Data access              | <a href="#">#29</a>  | Statement of who will have access to the final trial dataset, and    | 4   |
| 16 |                          |                      | disclosure of contractual agreements that limit such access for      |     |
| 17 |                          |                      | investigators                                                        |     |
| 18 |                          |                      |                                                                      |     |
| 19 |                          |                      |                                                                      |     |
| 20 | Ancillary and post trial | <a href="#">#30</a>  | Provisions, if any, for ancillary and post-trial care, and for       | 4   |
| 21 | care                     |                      | compensation to those who suffer harm from trial participation       |     |
| 22 |                          |                      |                                                                      |     |
| 23 |                          |                      |                                                                      |     |
| 24 | Dissemination policy:    | <a href="#">#31a</a> | Plans for investigators and sponsor to communicate trial results     | 4   |
| 25 | trial results            |                      | to participants, healthcare professionals, the public, and other     |     |
| 26 |                          |                      | relevant groups (eg, via publication, reporting in results           |     |
| 27 |                          |                      | databases, or other data sharing arrangements), including any        |     |
| 28 |                          |                      | publication restrictions                                             |     |
| 29 |                          |                      |                                                                      |     |
| 30 |                          |                      |                                                                      |     |
| 31 |                          |                      |                                                                      |     |
| 32 |                          |                      |                                                                      |     |
| 33 | Dissemination policy:    | <a href="#">#31b</a> | Authorship eligibility guidelines and any intended use of            | 1   |
| 34 | authorship               |                      | professional writers                                                 |     |
| 35 |                          |                      |                                                                      |     |
| 36 |                          |                      |                                                                      |     |
| 37 | Dissemination policy:    | <a href="#">#31c</a> | Plans, if any, for granting public access to the full protocol,      | n/a |
| 38 | reproducible research    |                      | participant-level dataset, and statistical code                      |     |
| 39 |                          |                      |                                                                      |     |
| 40 |                          |                      |                                                                      |     |
| 41 | <b>Appendices</b>        |                      |                                                                      |     |
| 42 |                          |                      |                                                                      |     |
| 43 | Informed consent         | <a href="#">#32</a>  | Model consent form and other related documentation given to          | 4   |
| 44 | materials                |                      | participants and authorised surrogates                               |     |
| 45 |                          |                      |                                                                      |     |
| 46 |                          |                      |                                                                      |     |
| 47 | Biological specimens     | <a href="#">#33</a>  | Plans for collection, laboratory evaluation, and storage of          | n/a |
| 48 |                          |                      | biological specimens for genetic or molecular analysis in the        |     |
| 49 |                          |                      | current trial and for future use in ancillary studies, if applicable |     |
| 50 |                          |                      |                                                                      |     |
| 51 |                          |                      |                                                                      |     |

The SPIRIT checklist is distributed under the terms of the Creative Commons Attribution License CC-BY-ND 3.0. This checklist was completed on 09. September 2019 using <https://www.goodreports.org/>, a tool made by the [EQUATOR Network](#) in collaboration with [Penelope.ai](#)
